# Supplementary material
Source: PubMed Central journal article supplement (PMC3370752)
Supplement: supp_56.6.2894_TableS1.pdf [file supp_56.6.2894_TableS1.pdf]

| <b>Supplemental Table S1. Gene Expression Responses to 6NDA in <i>S.cerevisiae</i></b> |                    |                                                                                                                                                                  |                    |
|----------------------------------------------------------------------------------------|--------------------|------------------------------------------------------------------------------------------------------------------------------------------------------------------|--------------------|
| <b>ORF</b>                                                                             | <b>Gene symbol</b> | <b>Description</b>                                                                                                                                               | <b>Fold Change</b> |
| YOR134W                                                                                | BAG7               | Rho GTPase activating protein (RhoGAP), stimulates the intrinsic GTPase activity of Rho1p, which plays a role in actin cytoskeleton organization and             | 156.5              |
| YGR213C                                                                                | RTA1               | Protein involved in 7-aminocholesterol resistance; has seven potential membrane-spanning regions                                                                 | 84.1               |
| YGR043C                                                                                |                    | Putative protein of unknown function; transcription is repressed by MOT1/YPL082C and induced by alpha-factor and during diauxic shift; green                     | 73.0               |
| YLR054C                                                                                | OSW2               | Protein of unknown function proposed to be involved in the assembly of the spore wall                                                                            | 44.4               |
| YFL014W                                                                                | HSP12              | Plasma membrane localized protein that protects membranes from desiccation; induced by heat shock, oxidative stress, osmostress, stationary                      | 42.1               |
| YAR050W                                                                                | FLO1               | Lectin-like protein involved in flocculation, cell wall protein that binds to mannose chains on the surface of other cells, confers floc-forming ability that is | 32.9               |
| YDR034W-B                                                                              |                    | Protein of unknown function; green fluorescent protein (GFP)-fusion protein localizes to the cell periphery                                                      | 31.7               |
| YJL116C                                                                                | NCA3               | Protein that functions with Nca2p to regulate mitochondrial expression of subunits 6 (Atp6p) and 8 (Atp8p) of the Fo-F1 ATP synthase; member of the              | 23.2               |
| YOL101C                                                                                | IZH4               | Membrane protein involved in zinc metabolism, member of the four-protein IZH family, expression induced by fatty acids and altered zinc levels; deletion         | 22.7               |
| YIL101C                                                                                | XBP1               | Transcriptional repressor that binds to promoter sequences of the cyclin genes, CYS3, and SMF2; expression is induced by stress or starvation during mitosis,    | 22.5               |
| YHR139C                                                                                | SPS100             | Protein required for spore wall maturation; expressed during sporulation; may be a component of the spore wall                                                   | 22.5               |
| YHR087W                                                                                |                    | Protein involved in RNA metabolism, one of two yeast homologs (with Sdo1p/Ylr022cp) of the human protein SBDS responsible for autosomal                          | 21.5               |
| YGR236C                                                                                | SPG1               | Protein required for survival at high temperature during stationary phase; not required for growth on nonfermentable carbon sources; the authentic, non-         | 21.2               |
| YNL160W                                                                                | YGP1               | Cell wall-related secretory glycoprotein; induced by nutrient deprivation-associated growth arrest and upon entry into stationary phase; may be involved         | 18.9               |
| YGL156W                                                                                | AMS1               | Vacuolar alpha mannosidase, involved in free oligosaccharide (fOS) degradation; delivered to the vacuole in a novel pathway separate from the                    | 18.8               |
| YJL144W                                                                                |                    | Cytoplasmic hydrophilin of unknown function, proposed to be involved in the dessication response; expression induced by osmotic stress, starvation               | 18.6               |
| YLR121C                                                                                | YPS3               | Aspartic protease, attached to the plasma membrane via a glycosylphosphatidylinositol (GPI) anchor                                                               | 18.2               |
| YHR209W                                                                                |                    | Putative S-adenosylmethionine-dependent methyltransferase                                                                                                        | 18.0               |
| YNL093W                                                                                | YPT53              | GTPase, similar to Ypt51p and Ypt52p and to mammalian rab5; required for vacuolar protein sorting and endocytosis                                                | 17.9               |
| YGL121C                                                                                | GPG1               | Proposed gamma subunit of the heterotrimeric G protein that interacts with the receptor Grp1p; involved in regulation of pseudohyphal growth; requires Gpb1p     | 17.8               |
| YMR315W-A                                                                              |                    | Putative protein of unknown function                                                                                                                             | 17.6               |
| YHR096C                                                                                | HXT5               | Hexose transporter with moderate affinity for glucose, may function in accumulation of reserve carbohydrates during stress, expression induced by a              | 17.0               |
| YKL163W                                                                                | PIR3               | O-glycosylated covalently-bound cell wall protein required for cell wall stability; expression is cell cycle regulated, peaking in M/G1 and also subject to      | 16.1               |
| YER037W                                                                                | PHM8               | Protein of unknown function, expression is induced by low phosphate levels and by inactivation of Pho85p                                                         | 13.8               |
| YOL052C-A                                                                              | DDR2               | Multistress response protein, expression is activated by a variety of xenobiotic agents and environmental or physiological stresses                              | 13.8               |
| YGR256W                                                                                | GND2               | 6-phosphogluconate dehydrogenase (decarboxylating), catalyzes an NADPH regenerating reaction in the pentose phosphate pathway; required for growth               | 13.6               |

|           |       |                                                                                                                                                                     |      |
|-----------|-------|---------------------------------------------------------------------------------------------------------------------------------------------------------------------|------|
| YAL061W   |       | putative polyol dehydrogenase                                                                                                                                       | 13.2 |
| YJL107C   |       | Putative protein of unknown function; expression is induced by activation of the HOG1 mitogen-activated signaling pathway and this induction is Hog1p/Pbs2p         | 12.8 |
| YOL047C   |       | Protein of unknown function; green fluorescent protein (GFP)-fusion protein localizes to the cytoplasm in a punctate pattern                                        | 12.6 |
| YNL194C   |       | Integral membrane protein localized to eisosomes, large immobile protein structures at the cell cortex associated with endocytosis; sporulation and                 | 12.4 |
| YOR049C   | RSB1  | Suppressor of sphingoid long chain base (LCB) sensitivity of an LCB-lyase mutation; putative integral membrane transporter or flippase that may transport           | 12.0 |
| YER185W   |       | Hypothetical protein                                                                                                                                                | 11.5 |
| YLR327C   | TMA10 | Protein of unknown function that associates with ribosomes                                                                                                          | 11.4 |
| YPL088W   |       | Putative aryl alcohol dehydrogenase; transcription is activated by paralogous transcription factors Yrm1p and Yrr1p along with genes involved in multidrug          | 10.8 |
| YJR078W   | BNA2  | Tryptophan 2,3-dioxygenase, required for biosynthesis of nicotinic acid from tryptophan via kynurenine pathway                                                      | 10.7 |
| YJL108C   | PRM10 | Pheromone-regulated protein, predicted to have 5 transmembrane segments                                                                                             | 10.5 |
| YNR064C   |       | Epoxide hydrolase, member of the alpha/beta hydrolase fold family; may have a role in detoxification of epoxides                                                    | 10.1 |
| YLR194C   |       | Structural constituent of the cell wall attached to the plasma membrane by a GPI-anchor; expression is upregulated in response to cell wall stress                  | 10.1 |
| YAL063C   | FLO9  | Lectin-like protein with similarity to Flo1p, thought to be expressed and involved in flocculation                                                                  | 9.7  |
| YDR380W   | ARO10 | Phenylpyruvate decarboxylase, catalyzes decarboxylation of phenylpyruvate to phenylacetaldehyde, which is the first specific step in the Ehrlich pathway            | 9.7  |
| YGR032W   | GSC2  | Catalytic subunit of 1,3-beta-glucan synthase, involved in formation of the inner layer of the spore wall; activity positively regulated by Rho1p and negatively by | 9.5  |
| YLR099C   | ICT1  | Protein of unknown function, null mutation leads to an increase in sensitivity to Calcofluor white; expression of the gene is induced in the presence of            | 9.4  |
| YHR138C   |       | Putative protein of unknown function; has similarity to Pbi2p; double null mutant lacking Pbi2p and Yhr138p exhibits highly fragmented vacuoles                     | 9.4  |
| YLR149C   |       | Putative protein of unknown function; YLR149C is not an essential gene                                                                                              | 9.3  |
| YCR007C   |       | Putative integral membrane protein, member of DUP240 gene family; YCR007C is not an essential gene                                                                  | 9.1  |
| YMR169C   | ALD3  | Cytoplasmic aldehyde dehydrogenase, involved in beta-alanine synthesis; uses NAD+ as the preferred coenzyme; very similar to Ald2p; expression is induced           | 9.1  |
| YKR091W   | SRL3  | Cytoplasmic protein that, when overexpressed, suppresses the lethality of a rad53 null mutation; potential Cdc28p substrate                                         | 9.1  |
| YNL237W   | YTP1  | Probable type-III integral membrane protein of unknown function, has regions of similarity to mitochondrial electron transport proteins                             | 8.9  |
| YLR136C   | TIS11 | mRNA-binding protein expressed during iron starvation; binds to a sequence element in the 3'-untranslated regions of specific mRNAs to mediate their                | 8.8  |
| YHR160C   | PEX18 | Part of a two-member peroxin family (Pex18p and Pex21p) specifically required for peroxisomal targeting of the Pex7p peroxisomal signal recognition factor          | 8.8  |
| YKL161C   |       | Protein kinase implicated in the Sit2p mitogen-activated (MAP) kinase signaling pathway; associates with Rlm1p                                                      | 8.7  |
| YBR085C-A |       | Hypothetical protein                                                                                                                                                | 8.7  |
| YBL049W   | MOH1  | Protein of unknown function, has homology to kinase Snf7p; not required for growth on nonfermentable carbon sources; essential for viability in stationary          | 8.2  |
| YMR316W   | DIA1  | Protein of unknown function, involved in invasive and pseudohyphal growth; green fluorescent protein (GFP)-fusion protein localizes to the cytoplasm in a           | 8.1  |

|         |       |                                                                                                                                                                    |     |
|---------|-------|--------------------------------------------------------------------------------------------------------------------------------------------------------------------|-----|
| YMR107W | SPG4  | Protein required for survival at high temperature during stationary phase; not required for growth on nonfermentable carbon sources                                | 8.1 |
| YDL244W | THI13 | Protein involved in synthesis of the thiamine precursor hydroxymethylpyrimidine (HMP); member of a subtelomeric gene family                                        | 7.9 |
| YBR054W | YRO2  | Putative plasma membrane protein of unknown function, transcriptionally regulated by Haa1p; green fluorescent protein (GFP)-fusion protein localizes to            | 7.7 |
| YOL151W | GRE2  | NADPH-dependent methylglyoxal reductase (D-lactaldehyde dehydrogenase); stress induced (osmotic, ionic, oxidative, heat shock and heavy metals);                   | 7.7 |
| YOR237W | HES1  | Protein implicated in the regulation of ergosterol biosynthesis; one of a seven member gene family with a common essential function and non-essential              | 7.6 |
| YGR146C |       | Putative protein of unknown function; induced by iron homeostasis transcription factor Aft2p; multicopy suppressor of a temperature sensitive <i>hsf1</i> mutant   | 7.6 |
| YIR039C | YPS6  | Putative GPI-anchored aspartic protease                                                                                                                            | 7.5 |
| YKR076W | ECM4  | Putative omega class glutathione transferase; not essential; similar to Ygr154cp; green fluorescent protein (GFP)-fusion protein localizes to the                  | 7.5 |
| YMR174C | PAI3  | Cytoplasmic proteinase A inhibitor, dependent on Pbs2p and Hog1p protein kinases for osmotic induction; intrinsically unstructured, N-terminal half                | 7.4 |
| YLR346C |       | Putative protein of unknown function found in mitochondria; expression is regulated by transcription factors involved in pleiotropic drug resistance, Pdr1p        | 7.4 |
| YOR273C | TPO4  | Polyamine transport protein, recognizes spermine, putrescine, and spermidine; localizes to the plasma membrane; member of the major facilitator superfamily        | 7.3 |
| YMR008C | PLB1  | Phospholipase B (lysophospholipase) involved in lipid metabolism, required for deacylation of phosphatidylcholine and phosphatidylethanolamine but not             | 7.3 |
| YMR084W |       | Hypothetical protein                                                                                                                                               | 7.3 |
| YDR453C | TSA2  | Stress inducible cytoplasmic thioredoxin peroxidase; cooperates with Tsa1p in the removal of reactive oxygen, nitrogen and sulfur species using thioredoxin        | 7.3 |
| YGR088W | CTT1  | Cytosolic catalase T, has a role in protection from oxidative damage by hydrogen peroxide                                                                          | 7.2 |
| YMR034C |       | Putative protein of unknown function with similarity to transporters; identified in a transposon mutagenesis screen as a gene involved in azole resistance;        | 7.2 |
| YEL057C |       | Protein of unknown function involved in telomere maintenance; target of UME6 regulation                                                                            | 6.9 |
| YGR131W |       | Hypothetical protein                                                                                                                                               | 6.7 |
| YBR117C | TKL2  | Transketolase, similar to Tkl1p; catalyzes conversion of xylulose-5-phosphate and ribose-5-phosphate to sedoheptulose-7-phosphate and glyceraldehyde-3-            | 6.6 |
| YLR031W |       | Hypothetical protein                                                                                                                                               | 6.6 |
| YBR214W | SDS24 | One of two <i>S. cerevisiae</i> homologs (Sds23p and Sds24p) of the <i>Schizosaccharomyces pombe</i> Sds23 protein, which genetic studies have                     | 6.6 |
| YMR085W |       | Hypothetical protein                                                                                                                                               | 6.6 |
| YPL240C | HSP82 | Cytoplasmic chaperone (Hsp90 family) required for pheromone signaling and negative regulation of Hsf1p; docks with the mitochondrial import receptor               | 6.6 |
| YLR461W | PAU4  | Part of 23-member seripauperin multigene family encoded mainly in subtelomeric regions, active during alcoholic fermentation, regulated by                         | 6.4 |
| YMR322C | SNO4  | Possible chaperone and cysteine protease with similarity to <i>E. coli</i> Hsp31 and <i>S. cerevisiae</i> Hsp31p, Hsp32p, and Hsp33p; member of the DJ-1/ThiJ/Pfpl | 6.4 |
| YLL039C | UBI4  | Ubiquitin, becomes conjugated to proteins, marking them for selective degradation via the ubiquitin-26S proteasome system; essential for the cellular              | 6.3 |
| YKR049C | FMP46 | Mitochondrial protein of unknown function; putative redox protein containing a thioredoxin fold                                                                    | 6.3 |
| YOL084W | PHM7  | Protein of unknown function, expression is regulated by phosphate levels; green fluorescent protein (GFP)-fusion protein localizes to the cell periphery           | 6.1 |

|         |       |                                                                                                                                                               |     |
|---------|-------|---------------------------------------------------------------------------------------------------------------------------------------------------------------|-----|
| YDR055W | PST1  | Cell wall protein that contains a putative GPI-attachment site; secreted by regenerating protoplasts; up-regulated by activation of the cell integrity        | 6.0 |
| YER150W | SPI1  | GPI-anchored, serine/threonine rich cell wall protein of unknown function; basal expression requires Msn2p/Msn4p; expression is induced under conditions of   | 6.0 |
| YNR075W | COS10 | Protein of unknown function, member of the DUP380 subfamily of conserved, often subtelomerically-encoded proteins                                             | 6.0 |
| YOR173W | DCS2  | Non-essential protein containing a HIT (histidine triad) motif; regulated by Msn2p, Msn4p, and the Ras-cAMP-cAPK signaling pathway, transcript                | 6.0 |
| YOR338W |       | Hypothetical protein                                                                                                                                          | 6.0 |
| YBR072W | HSP26 | Small heat shock protein with chaperone activity that is regulated by a heat induced transition from an inactive oligomeric (24-mer) complex to an active     | 6.0 |
| YDR223W | CRF1  | Transcriptional corepressor involved in the regulation of ribosomal protein gene transcription via the TOR signaling pathway and protein kinase A,            | 5.9 |
| YOL016C | CMK2  | Calmodulin-dependent protein kinase; may play a role in stress response, many CA <sup>++</sup> /calmodulin dependent phosphorylation substrates demonstrated  | 5.9 |
| YML100W | TSL1  | Large subunit of trehalose 6-phosphate synthase (Tps1p)/phosphatase (Tps2p) complex, which converts uridine-5'-diphosphoglucose and glucose 6-phosphate       | 5.9 |
| YBR033W |       | Non-essential protein of unknown function                                                                                                                     | 5.8 |
| YGL179C | TOS3  | Protein kinase, related to and functionally redundant with Elm1p and Sak1p for the phosphorylation and activation of Snf1p; functionally orthologous to LKB1, | 5.8 |
| YBR295W | PCA1  | P-type metal-transporting ATPase with a role in copper and iron homeostasis; R970G-substitution in the C-terminal region confers cadmium resistance           | 5.8 |
| YAL068C |       | Hypothetical protein                                                                                                                                          | 5.6 |
| YKL096W | CWP1  | Cell wall mannoprotein, linked to a beta-1,3- and beta-1,6-glucan heteropolymer through a phosphodiester bond; involved in cell wall                          | 5.6 |
| YOR289W |       | Hypothetical protein                                                                                                                                          | 5.5 |
| YEL060C | PRB1  | Vacuolar proteinase B (yscB), a serine protease of the subtilisin family; involved in protein degradation in the vacuole and required for full protein        | 5.5 |
| YER184C |       | Hypothetical protein                                                                                                                                          | 5.4 |
| YJL161W |       | The authentic, non-tagged protein was localized to the mitochondria                                                                                           | 5.3 |
| YKL159C | RCN1  | Protein involved in calcineurin regulation during calcium signaling; has similarity to H. sapiens DSCR1 which is found in the Down Syndrome                   | 5.2 |
| YPR001W | CIT3  | Citrate synthase, catalyzes the condensation of acetyl coenzyme A and oxaloacetate to form citrate, mitochondrial isozyme involved in the TCA cycle           | 5.2 |
| YBR056W |       | Hypothetical protein                                                                                                                                          | 5.2 |
| YGR059W | SPR3  | Sporulation-specific homolog of the yeast CDC3/10/11/12 family of bud neck microfilament genes; septin protein involved in sporulation; regulated by ABFI     | 5.1 |
| YNR060W | FRE4  | Ferric reductase, reduces a specific subset of siderophore-bound iron prior to uptake by transporters; expression induced by low iron levels                  | 5.1 |
| YBL078C | ATG8  | Protein required for autophagy; modified by the serial action of Atg4p, Atg7p, and Atg3p, and conjugated at the C terminus with phosphatidylethanolamine,     | 5.1 |
| YLR205C | HMX1  | ER localized, heme-binding peroxidase involved in the degradation of heme; does not exhibit heme oxygenase activity despite similarity to heme                | 5.1 |
| YMR053C | STB2  | Protein that interacts with Sin3p in a two-hybrid assay and is part of a large protein complex with Sin3p and Stb1p                                           | 5.1 |
| YKL151C |       | Putative protein of unknown function; green fluorescent protein (GFP)-fusion protein localizes to the cytoplasm                                               | 5.0 |
| YHR097C |       | Putative protein of unknown function; green fluorescent protein (GFP)-fusion protein localizes to the cytoplasm and the nucleus                               | 5.0 |

|         |       |                                                                                                                                                              |     |
|---------|-------|--------------------------------------------------------------------------------------------------------------------------------------------------------------|-----|
| YKL107W |       | Putative protein of unknown function                                                                                                                         | 5.0 |
| YOR385W |       | Hypothetical protein                                                                                                                                         | 5.0 |
| YMR040W | YET2  | Endoplasmic reticulum transmembrane protein, homolog of human BAP31 protein                                                                                  | 4.9 |
| YGR144W | THI4  | Protein required for thiamine biosynthesis and for mitochondrial genome stability                                                                            | 4.8 |
| YLL064C | PAU6  | Hypothetical protein /// Part of 23-member seripauperin multigene family encoded mainly in subtelomeric regions, active during alcoholic fermentation,       | 4.8 |
| YKR061W | KTR2  | Mannosyltransferase involved in N-linked protein glycosylation; member of the KRE2/MNT1 mannosyltransferase family                                           | 4.8 |
| YOR152C |       | Hypothetical protein                                                                                                                                         | 4.8 |
| YDR085C | AFR1  | Alpha-factor pheromone receptor regulator, negatively regulates pheromone receptor signaling; required for normal mating projection (shmoo) formation;       | 4.7 |
| YNR002C | ATO2  | Putative transmembrane protein, involved in the export of ammonia, a starvation signal that promotes cell death in the center of aging colonies;             | 4.7 |
| YOR220W |       | protein that interacts genetically with the Pat1 mRNA-decapping factor                                                                                       | 4.7 |
| YJL153C | INO1  | Inositol 1-phosphate synthase, involved in synthesis of inositol phosphates and inositol-containing phospholipids; transcription is coregulated with other   | 4.6 |
| YGL183C | MND1  | Protein required for recombination and meiotic nuclear division; forms a complex with Hop2p, which is involved in chromosome pairing and repair of           | 4.6 |
| YNR019W | ARE2  | Acyl-CoA:sterol acyltransferase, isozyme of Are1p; endoplasmic reticulum enzyme that contributes the major sterol esterification activity in the presence    | 4.6 |
| YER106W | MAM1  | Monopolin, kinetochore associated protein involved in chromosome attachment to meiotic spindle                                                               | 4.6 |
| YER062C | HOR2  | One of two redundant DL-glycerol-3-phosphatases (RHR2/GPP1 encodes the other) involved in glycerol biosynthesis; induced in response to hyperosmotic         | 4.6 |
| YNL092W |       | Putative S-adenosylmethionine-dependent methyltransferase of the seven beta-strand family; YNL092W is not an essential gene                                  | 4.6 |
| YOR377W | ATF1  | Alcohol acetyltransferase with potential roles in lipid and sterol metabolism; responsible for the major part of volatile acetate ester production during    | 4.5 |
| YHR124W | NDT80 | Meiosis-specific transcription factor required for exit from pachytene and for full meiotic recombination; activates middle sporulation genes; competes with | 4.5 |
| YDL246C | SOR2  | Protein of unknown function, computational analysis of large-scale protein-protein interaction data suggests a possible role in fructose or mannose          | 4.5 |
| YMR250W | GAD1  | Glutamate decarboxylase, converts glutamate into gamma-aminobutyric acid (GABA) during glutamate catabolism; involved in response to oxidative stress        | 4.5 |
| YDR171W | HSP42 | Small cytosolic stress-induced chaperone that forms barrel-shaped oligomers and suppresses the aggregation of non-native proteins; oligomer dissociation is  | 4.5 |
| YCR104W | PAU3  | Part of 23-member seripauperin multigene family encoded mainly in subtelomeric regions, active during alcoholic fermentation, regulated by                   | 4.4 |
| YGL039W |       | Oxidoreductase, catalyzes NADPH-dependent reduction of the bicyclic diketone bicyclo[2.2.2]octane-2,6-dione (BCO <sub>2,6D</sub> ) to the chiral ketoalcohol | 4.4 |
| YNL202W | SPS19 | Peroxisomal 2,4-dienoyl-CoA reductase, auxiliary enzyme of fatty acid beta-oxidation; homodimeric enzyme required for growth and sporulation on              | 4.4 |
| YFR022W | ROG3  | Protein that binds to Rsp5p, which is a hect-type ubiquitin ligase, via its 2 PY motifs; has similarity to Rod1p; mutation suppresses the temperature        | 4.4 |
| YLR030W |       | Hypothetical protein                                                                                                                                         | 4.4 |
| YMR102C |       | Protein of unknown function; transcription is activated by paralogous transcription factors Yrm1p and Yrr1p along with genes involved in multidrug           | 4.3 |
| YOR185C | GSP2  | GTP binding protein (mammalian Ranp homolog) involved in the maintenance of nuclear organization, RNA processing and transport; interacts with Kap121p,      | 4.3 |

|           |        |                                                                                                                                                                |     |
|-----------|--------|----------------------------------------------------------------------------------------------------------------------------------------------------------------|-----|
| YLR307W   | CDA1   | Chitin deacetylase, together with Cda2p involved in the biosynthesis ascospore wall component, chitosan; required for proper rigidity of the ascospore wall    | 4.3 |
| YKR003W   | OSH6   | Member of an oxysterol-binding protein family with overlapping, redundant functions in sterol metabolism and which collectively perform a function             | 4.3 |
| YGL258W-A |        | Putative protein of unknown function                                                                                                                           | 4.3 |
| YGR174W-A |        | Putative protein of unknown function                                                                                                                           | 4.2 |
| YDR379C-A |        | Hypothetical protein identified by homology. See FEBS Letters [2000] 487:31-36.                                                                                | 4.2 |
| YDL114W   |        | Putative protein of unknown function with similarity to acyl-carrier-protein reductases; YDL114W is not an essential gene                                      | 4.2 |
| YOR036W   | PEP12  | Target membrane receptor (t-SNARE) for vesicular intermediates traveling between the Golgi apparatus and the vacuole; controls entry of biosynthetic,          | 4.2 |
| YBR203W   | COS111 | Protein required for wild-type resistance to the antifungal drug ciclopirox olamine; not related to the COS family of subtelomerically-encoded proteins        | 4.2 |
| YNL192W   | CHS1   | Chitin synthase I, requires activation from zymogenic form in order to catalyze the transfer of N-acetylglucosamine (GlcNAc) to chitin; required for repairing | 4.2 |
| YHL021C   |        | The authentic, non-tagged protein was localized to the mitochondria                                                                                            | 4.1 |
| YMR196W   |        | Putative protein of unknown function; green fluorescent protein (GFP)-fusion protein localizes to the cytoplasm; YMR196W is not an essential gene              | 4.1 |
| YPL223C   | GRE1   | Hydrophilin of unknown function; stress induced (osmotic, ionic, oxidative, heat shock and heavy metals); regulated by the HOG pathway                         | 4.1 |
| YLR178C   | TFS1   | Carboxypeptidase Y inhibitor, function requires acetylation by the NatB N-terminal acetyltransferase; phosphatidylethanolamine-binding protein involved        | 4.1 |
| YOL083W   |        | Hypothetical protein                                                                                                                                           | 4.0 |
| YHR030C   | SLT2   | Serine/threonine MAP kinase involved in regulating the maintenance of cell wall integrity and progression through the cell cycle; regulated by the PKC1-       | 4.0 |
| YLR120C   | YPS1   | Aspartic protease, attached to the plasma membrane via a glycosylphosphatidylinositol (GPI) anchor                                                             | 4.0 |
| YIL099W   | SGA1   | Intracellular sporulation-specific glucoamylase involved in glycogen degradation; induced during starvation of a/a diploids late in sporulation, but           | 4.0 |
| YDL110C   | TMA17  | Protein of unknown function that associates with ribosomes                                                                                                     | 4.0 |
| YLR267W   |        | Protein of unknown function, overproduction suppresses a pam1 slv3 double null mutation                                                                        | 3.9 |
| YDL234C   | GYP7   | GTPase-activating protein for yeast Rab family members including: Ypt7p (most effective), Ypt1p, Ypt31p, and Ypt32p (in vitro); involved in vesicle            | 3.9 |
| YDR258C   | HSP78  | Oligomeric mitochondrial matrix chaperone that cooperates with Ssc1p in mitochondrial thermotolerance after heat shock; prevents the aggregation of            | 3.9 |
| YLL026W   | HSP104 | Heat shock protein that cooperates with Ydj1p (Hsp40) and Ssa1p (Hsp70) to refold and reactivate previously denatured, aggregated proteins; responsive to      | 3.9 |
| YIL176C   | PAU1   | Hypothetical protein /// Part of 23-member seripauperin multigene family encoded mainly in subtelomeric regions, active during alcoholic fermentation,         | 3.9 |
| YKR046C   | PET10  | Protein of unknown function that co-purifies with lipid particles; expression pattern suggests a role in respiratory growth; computational analysis of large-  | 3.9 |
| YLR080W   | EMP46  | Integral membrane component of endoplasmic reticulum-derived COPII-coated vesicles, which function in ER to Golgi transport                                    | 3.9 |
| YMR323W   | ERR3   | Protein of unknown function, has similarity to enolases /// Protein of unknown function, has similarity to enolases /// Protein of unknown function, has       | 3.9 |
| YGL157W   |        | Oxidoreductase, catalyzes NADPH-dependent reduction of the bicyclic diketone bicyclo[2.2.2]octane-2,6-dione (BCO <sub>2,6</sub> D) to the chiral ketoalcohol   | 3.8 |
| YDL222C   | FMP45  | Integral membrane protein localized to mitochondria (untagged protein) and eisosomes, immobile patches at the cortex associated with endocytosis;              | 3.8 |

|         |       |                                                                                                                                                                  |     |
|---------|-------|------------------------------------------------------------------------------------------------------------------------------------------------------------------|-----|
| YNR059W | MNT4  | Putative alpha-1,3-mannosyltransferase, not required for protein O-glycosylation                                                                                 | 3.8 |
| YGR142W | BTN2  | Cytosolic coiled-coil protein that modulates arginine uptake, interacts with Rhb1p, possible role in mediating pH homeostasis between the vacuole and            | 3.8 |
| YGR268C | HUA1  | Cytoplasmic protein containing a zinc finger domain with sequence similarity to that of Type I J-proteins; computational analysis of large-scale protein-protein | 3.8 |
| YGR243W |       | The authentic, non-tagged protein was localized to mitochondria                                                                                                  | 3.8 |
| YGL053W | PRM8  | Pheromone-regulated protein with 2 predicted transmembrane segments and an FF sequence, a motif involved in COPII binding; forms a complex with                  | 3.8 |
| YGR110W |       | Putative protein of unknown function; transcription is increased in response to genotoxic stress                                                                 | 3.8 |
| YGR052W |       | The authentic, non-tagged protein was localized to the mitochondria                                                                                              | 3.8 |
| YMR181C |       | Protein of unknown function; mRNA transcribed as part of a bicistronic transcript with a predicted transcriptional repressor RGM1/YMR182C; mRNA is               | 3.8 |
| YPL170W | DAP1  | Heme-binding protein involved in regulation of cytochrome P450 protein Erg11p; damage response protein, related to mammalian membrane                            | 3.8 |
| YDL223C | HBT1  | Substrate of the Hub1p ubiquitin-like protein that localizes to the shmoo tip (mating projection); mutants are defective for mating projection formation,        | 3.8 |
| YML128C | MSC1  | Protein of unknown function, green fluorescent protein (GFP)-fusion protein localizes to the endoplasmic reticulum; msc1 mutants are defective in directing      | 3.8 |
| YJR096W |       | Putative xylose and arabinose reductase                                                                                                                          | 3.8 |
| YJL048C | UBX6  | UBX (ubiquitin regulatory X) domain-containing protein that interacts with Cdc48p, transcription is repressed when cells are grown in media containing           | 3.7 |
| YIR033W | MGA2  | ER membrane protein involved, with its homolog Spt23p, in regulation of OLE1 transcription; inactive ER form dimerizes and one subunit is then activated by      | 3.7 |
| YAL005C | SSA1  | ATPase involved in protein folding and nuclear localization signal (NLS)-directed nuclear transport; member of heat shock protein 70 (HSP70) family;             | 3.7 |
| YER179W | DMC1  | Meiosis-specific protein required for repair of double-strand breaks and pairing between homologous chromosomes; homolog of Rad51p and the bacterial             | 3.7 |
| YDR074W | TPS2  | Phosphatase subunit of the trehalose-6-phosphate synthase/phosphatase complex, which synthesizes the storage carbohydrate trehalose; expression is               | 3.7 |
| YIL160C | POT1  | 3-ketoacyl-CoA thiolase with broad chain length specificity, cleaves 3-ketoacyl-CoA into acyl-CoA and acetyl-CoA during beta-oxidation of fatty acids            | 3.6 |
| YDR001C | NTH1  | Neutral trehalase, degrades trehalose; required for thermotolerance and may mediate resistance to other cellular stresses; may be phosphorylated by              | 3.6 |
| YGR149W |       | Putative protein of unknown function; predicted to be an integral membrane protein                                                                               | 3.6 |
| YMR020W | FMS1  | Polyamine oxidase, converts spermine to spermidine, which is required for the essential hypusination modification of translation factor eIF-5A; also involved in | 3.6 |
| YCL048W | SPS22 | Protein of unknown function, redundant with Sps2p for the organization of the beta-glucan layer of the spore wall                                                | 3.6 |
| YGR189C | CRH1  | Putative glycosidase of the cell wall, may have a role in cell wall architecture                                                                                 | 3.5 |
| YMR175W | SIP18 | Protein of unknown function whose expression is induced by osmotic stress                                                                                        | 3.5 |
| YDR058C | TGL2  | Protein with lipolytic activity towards triacylglycerols and diacylglycerols when expressed in E. coli; role in yeast lipid degradation is unclear               | 3.5 |
| YOR208W | PTP2  | Phosphotyrosine-specific protein phosphatase involved in the inactivation of mitogen-activated protein kinase (MAPK) during osmolarity sensing;                  | 3.5 |
| YJR019C | TES1  | Peroxisomal acyl-CoA thioesterase likely to be involved in fatty acid oxidation rather than fatty acid synthesis; conserved protein also found in human          | 3.5 |
| YDR391C |       | Hypothetical protein                                                                                                                                             | 3.5 |

|           |       |                                                                                                                                                                |     |
|-----------|-------|----------------------------------------------------------------------------------------------------------------------------------------------------------------|-----|
| YDR402C   | DIT2  | N-formyltyrosine oxidase, sporulation-specific microsomal enzyme required for spore wall maturation, involved in the production of a soluble LL-dityrosine-    | 3.5 |
| YFL041W-A |       | Putative protein of unknown function; identified by fungal homology and RT-PCR                                                                                 | 3.5 |
| YPL149W   | ATG5  | Conserved autophagy-related protein that undergoes conjugation with Atg12p and then associates with Atg16p to form a cytosolic complex essential for           | 3.5 |
| YBL064C   | PRX1  | Mitochondrial peroxiredoxin (1-Cys Prx) with thioredoxin peroxidase activity, has a role in reduction of hydroperoxides; induced during respiratory growth     | 3.4 |
| YFL030W   | AGX1  | Alanine : glyoxylate aminotransferase, catalyzes the synthesis of glycine from glyoxylate, which is one of three pathways for glycine biosynthesis in yeast;   | 3.4 |
| YGR161C   | RTS3  | Putative component of the protein phosphatase type 2A complex                                                                                                  | 3.4 |
| YDR070C   |       | The authentic, non-tagged protein was localized to the mitochondria                                                                                            | 3.4 |
| YGL166W   | CUP2  | Copper-binding transcription factor; activates transcription of the metallothionein genes CUP1-1 and CUP1-2 in response to elevated copper                     | 3.4 |
| YNL115C   |       | Putative protein of unknown function; green fluorescent protein (GFP)-fusion protein localizes to mitochondria; YNL115C is not an essential gene               | 3.4 |
| YBL093C   | ROX3  | RNA polymerase II holoenzyme component                                                                                                                         | 3.4 |
| YIL055C   |       | Hypothetical protein                                                                                                                                           | 3.4 |
| YCR018C   | SRD1  | Protein involved in the processing of pre-rRNA to mature rRNA; contains a C2/C2 zinc finger motif; srd1 mutation suppresses defects caused by the rrp1-        | 3.4 |
| YBR053C   |       | Hypothetical protein                                                                                                                                           | 3.3 |
| YBR169C   | SSE2  | Member of the heat shock protein 70 (HSP70) family; may be involved in protein folding; localized to the cytoplasm; highly homologous to the heat              | 3.3 |
| YAL008W   | FUN14 | Mitochondrial protein of unknown function                                                                                                                      | 3.3 |
| YML118W   | NGL3  | Putative endonuclease, has a domain similar to a magnesium-dependent endonuclease motif in mRNA deadenylase Ccr4p; similar to Ngl1p and Ngl2p                  | 3.3 |
| YKL086W   | SRX1  | Sulfiredoxin, contributes to oxidative stress resistance by reducing cysteine-sulfenic acid groups in the peroxiredoxins Tsa1p and Ahp1p that are formed       | 3.3 |
| YDL124W   |       | NADPH-dependent alpha-keto amide reductase; reduces aromatic alpha-keto amides, aliphatic alpha-keto esters, and aromatic alpha-keto esters                    | 3.3 |
| YGL248W   | PDE1  | Low-affinity cyclic AMP phosphodiesterase, controls glucose and intracellular acidification-induced cAMP signaling, target of the cAMP-protein kinase A        | 3.3 |
| YDR358W   | GGA1  | Golgi-localized protein with homology to gamma-adaptin, interacts with and regulates Arf1p and Arf2p in a GTP-dependent manner in order to facilitate          | 3.3 |
| YLR414C   |       | Putative protein of unknown function; green fluorescent protein (GFP)-fusion protein localizes to the bud and cytoplasm; Hog1p is required for transcriptional | 3.2 |
| YOL002C   | IZH2  | Membrane protein involved in zinc metabolism, member of the four-protein IZH family, direct target of the Zap1p transcription factor, expression induced by    | 3.2 |
| YLR107W   | REX3  | RNA exonuclease; required for maturation of the RNA component of RNase MRP; functions redundantly with Rnh70p and Rex2p in processing of U5                    | 3.2 |
| YBR005W   | RCR1  | Protein of the endoplasmic reticulum membrane involved in chitin deposition in the cell wall; overproduction confers resistance to Congo Red                   | 3.2 |
| YGR008C   | STF2  | Protein involved in regulation of the mitochondrial F1F0-ATP synthase; Stf1p and Stf2p act as stabilizing factors that enhance inhibitory action of the Inh1p  | 3.2 |
| YIL072W   | HOP1  | Meiosis-specific DNA binding protein that displays Red1p dependent localization to the unsynapsed axial-lateral elements of the synaptonemal                   | 3.2 |
| YCL038C   | ATG22 | Protein required for the breakdown of autophagic vesicles in the vacuole during autophagy, putative integral membrane protein that localizes to vacuolar       | 3.2 |
| YGL104C   | VPS73 | Mitochondrial protein of unknown function involved in vacuolar protein sorting                                                                                 | 3.2 |



|           |       |                                                                                                                                                                              |     |
|-----------|-------|------------------------------------------------------------------------------------------------------------------------------------------------------------------------------|-----|
| YDL204W   | RTN2  | Protein of unknown function; has similarity to mammalian reticulon proteins; member of the RTNLA (reticulon-like A) subfamily                                                | 3.2 |
| YGR249W   | MGA1  | Protein similar to heat shock transcription factor; multicopy suppressor of pseudohyphal growth defects of ammonium permease mutants                                         | 3.2 |
| YOL155C   | HPF1  | Haze-protective mannoprotein that reduces the particle size of aggregated proteins in white wines                                                                            | 3.2 |
| YGR126W   |       | Putative protein of unknown function; green fluorescent protein (GFP)-fusion protein localizes to both the cytoplasm and the nucleus                                         | 3.2 |
| YBR280C   | SAF1  | F-Box protein involved in proteasome-dependent degradation of Aah1p during entry of cells into quiescence; interacts with Skp1                                               | 3.2 |
| YGR138C   | TPO2  | Polyamine transport protein specific for spermine; localizes to the plasma membrane; transcription of TPO2 is regulated by Haa1p; member of the major                        | 3.2 |
| YOL131W   |       | Hypothetical protein                                                                                                                                                         | 3.1 |
| YJL066C   | MPM1  | Mitochondrial membrane protein of unknown function, contains no hydrophobic stretches                                                                                        | 3.1 |
| YOR120W   | GCY1  | Putative NADP(+) coupled glycerol dehydrogenase, proposed to be involved in an alternative pathway for glycerol catabolism                                                   | 3.1 |
| YPL221W   | FLC1  | Putative FAD transporter; required for uptake of FAD into endoplasmic reticulum; involved in cell wall maintenance                                                           | 3.1 |
| YKL221W   | MCH2  | Protein with similarity to mammalian monocarboxylate permeases, which are involved in transport of monocarboxylic acids across the plasma membrane;                          | 3.1 |
| YGL126W   | SCS3  | Protein required for inositol prototrophy, appears to be involved in the synthesis of inositol phospholipids from inositol but not in the control of inositol synthesis      | 3.1 |
| YJL082W   | IML2  | Protein of unknown function, green fluorescent protein (GFP)-fusion protein localizes to the cytoplasm and nucleus                                                           | 3.1 |
| YGR066C   |       | Putative protein of unknown function                                                                                                                                         | 3.1 |
| YGL006W   | PMC1  | Vacuolar Ca <sup>2+</sup> ATPase involved in depleting cytosol of Ca <sup>2+</sup> ions; prevents growth inhibition by activation of calcineurin in the presence of elevated | 3.1 |
| YIL169C   |       | Putative protein of unknown function; serine/threonine rich and highly similar to YOL155C, a putative glucan alpha-1,4-glucosidase; transcript is induced in                 | 3.1 |
| YDL113C   | ATG20 | Protein required for transport of aminopeptidase I (Lap4p) through the cytoplasm-to-vacuole targeting pathway; binds phosphatidylinositol-3-                                 | 3.1 |
| YBR046C   | ZTA1  | Zeta-crystallin homolog, found in the cytoplasm and nucleus; has similarity to E. coli quinone oxidoreductase and to human zeta-crystallin, which has                        | 3.1 |
| YJR116W   |       | Hypothetical protein                                                                                                                                                         | 3.1 |
| YCR061W   |       | Protein of unknown function; green fluorescent protein (GFP)-fusion protein localizes to the cytoplasm in a punctate pattern                                                 | 3.1 |
| YGL015C   |       | Hypothetical protein                                                                                                                                                         | 3.0 |
| YLL019C   | KNS1  | Nonessential putative protein kinase of unknown cellular role; member of the LAMMER family of protein kinases, which are serine/threonine kinases also                       | 3.0 |
| YLR251W   | SYM1  | Protein required for ethanol metabolism; induced by heat shock and localized to the inner mitochondrial membrane; homologous to mammalian peroxisomal                        | 3.0 |
| YAL037C-A |       | Identified by SAGE                                                                                                                                                           | 3.0 |
| YJL163C   |       | Hypothetical protein                                                                                                                                                         | 3.0 |
| YGR237C   |       | Putative protein of unknown function; green fluorescent protein (GFP)-fusion protein localizes to the cytoplasm                                                              | 3.0 |
| YDL169C   | UGX2  | Protein of unknown function, transcript accumulates in response to any combination of stress conditions                                                                      | 3.0 |
| YJL057C   | IKS1  | Putative serine/threonine kinase; expression is induced during mild heat stress; deletion mutants are hypersensitive to copper sulphate and resistant to                     | 3.0 |

|           |        |                                                                                                                                                                                       |     |
|-----------|--------|---------------------------------------------------------------------------------------------------------------------------------------------------------------------------------------|-----|
| YKR098C   | UBP11  | Ubiquitin-specific protease that cleaves ubiquitin from ubiquitinated proteins                                                                                                        | 3.0 |
| YKL183C-A |        | Putative protein of unknown function; identified by fungal homology and RT-PCR                                                                                                        | 3.0 |
| YNL036W   | NCE103 | Carbonic anhydrase; poorly transcribed under aerobic conditions and at an undetectable level under anaerobic conditions; involved in non-classical protein                            | 3.0 |
| YIL136W   | OM45   | Protein of unknown function, major constituent of the mitochondrial outer membrane; located on the outer (cytosolic) face of the outer membrane                                       | 2.9 |
| YBR076W   | ECM8   | Non-essential protein of unknown function                                                                                                                                             | 2.9 |
| YBR149W   | ARA1   | Large subunit of NADP <sup>+</sup> dependent arabinose dehydrogenase, involved in carbohydrate metabolism; small subunit is unidentified                                              | 2.9 |
| YHR140W   |        | Putative integral membrane protein of unknown function                                                                                                                                | 2.9 |
| YGR087C   | PDC6   | Minor isoform of pyruvate decarboxylase, key enzyme in alcoholic fermentation, decarboxylates pyruvate to acetaldehyde, regulation is glucose-                                        | 2.9 |
| YKR053C   | YSR3   | Dihydro sphingosine 1-phosphate phosphatase, membrane protein involved in sphingolipid metabolism; has similarity to Lcb3p                                                            | 2.9 |
| YJR142W   |        | Putative protein of unknown function                                                                                                                                                  | 2.9 |
| YCR068W   | ATG15  | Lipase, required for intravacuolar lysis of autophagic bodies; located in the endoplasmic reticulum membrane and targeted to intravacuolar vesicles during                            | 2.9 |
| YDL020C   | RPN4   | Transcription factor that stimulates expression of proteasome genes; Rpn4p levels are in turn regulated by the 26S proteasome in a negative feedback                                  | 2.9 |
| YDL130W-A | STF1   | Protein involved in regulation of the mitochondrial F1F0-ATP synthase; Stf1p and Stf2p act as stabilizing factors that enhance inhibitory action of the Inh1p                         | 2.9 |
| YBR284W   |        | Putative protein of unknown function; YBR284W is not an essential gene; null mutant exhibits decreased resistance to rapamycin and wortmannin                                         | 2.9 |
| YPL230W   |        | Up in StarVation                                                                                                                                                                      | 2.9 |
| YCL049C   |        | Protein of unknown function; localizes to membrane fraction; YCL049C is not an essential gene;                                                                                        | 2.9 |
| YOR019W   |        | Hypothetical protein                                                                                                                                                                  | 2.9 |
| YMR173W   | DDR48  | DNA damage-responsive protein, expression is increased in response to heat-shock stress or treatments that produce DNA lesions; contains multiple repeats                             | 2.9 |
| YDR072C   | IPT1   | Inositolphosphotransferase 1, involved in synthesis of mannose-(inositol-P) <sub>2</sub> -ceramide (M(IP) <sub>2</sub> C), which is the most abundant sphingolipid in cells, mutation | 2.9 |
| YKL026C   | GPX1   | Phospholipid hydroperoxide glutathione peroxidase induced by glucose starvation that protects cells from phospholipid hydroperoxides and                                              | 2.9 |
| YMR104C   | YPK2   | Protein kinase with similarity to serine/threonine protein kinase Ypk1p; functionally redundant with YPK1 at the genetic level; participates in a signaling                           | 2.9 |
| YMR096W   | SNZ1   | Protein involved in vitamin B6 biosynthesis; member of a stationary phase-induced gene family; coregulated with SNO1; interacts with Sno1p and with                                   | 2.9 |
| YDR018C   |        | Hypothetical protein                                                                                                                                                                  | 2.9 |
| YPL070W   | MUK1   | Protein of unknown function, localized to the cytoplasm; computational analysis of large-scale protein-protein interaction data suggests a possible role in                           | 2.8 |
| YER035W   | EDC2   | RNA-binding protein, activates mRNA decapping directly by binding to the mRNA substrate and enhancing the activity of the decapping proteins Dcp1p                                    | 2.8 |
| YJR149W   |        | Putative protein of unknown function; green fluorescent protein (GFP)-fusion protein localizes to the cytoplasm                                                                       | 2.8 |
| YIL154C   | IMP2   | Transcriptional activator involved in maintenance of ion homeostasis and protection against DNA damage caused by bleomycin and other oxidants,                                        | 2.8 |
| YNL208W   |        | Hypothetical protein                                                                                                                                                                  | 2.8 |

|           |      |                                                                                                                                                              |     |
|-----------|------|--------------------------------------------------------------------------------------------------------------------------------------------------------------|-----|
| YGR136W   | LSB1 | Protein containing an N-terminal SH3 domain; binds Las17p, which is a homolog of human Wiskott-Aldrich Syndrome protein involved in actin patch              | 2.8 |
| YNL094W   | APP1 | Protein of unknown function, interacts with Rvs161p and Rvs167p; computational analysis of protein-protein interactions in large-scale studies               | 2.8 |
| YLR162W-A |      | Putative protein of unknown function identified by fungal homology comparisons and RT-PCR                                                                    | 2.8 |
| YPL186C   | UIP4 | Protein of unknown function that interacts with Ulp1p, a Ubl (ubiquitin-like protein)-specific protease for Smt3p protein conjugates                         | 2.8 |
| YNL012W   | SPO1 | Meiosis-specific protein with similarity to phospholipase B, required for meiotic spindle pole body duplication and separation; required for spore formation | 2.8 |
| YJL164C   | TPK1 | Subunit of cytoplasmic cAMP-dependent protein kinase, which contains redundant catalytic subunits Tpk1p, Tpk2p, and Tpk3p and regulatory subunit             | 2.8 |
| YJL020C   | BBC1 | Protein possibly involved in assembly of actin patches; interacts with an actin assembly factor Las17p and with the SH3 domains of Type I myosins Myo3p      | 2.8 |
| YJL149W   |      | Putative SCF ubiquitin ligase F-box protein of unknown function; interacts physically with both Cdc53p and Skp1 and genetically with CDC34; similar to       | 2.8 |
| YMR140W   | SIP5 | Protein of unknown function; interacts with both the Reg1p/Glc7p phosphatase and the Snf1p kinase                                                            | 2.8 |
| YER144C   | UBP5 | Putative ubiquitin-specific protease that does not associate with the proteasome                                                                             | 2.7 |
| YDR255C   | RMD5 | Cytosolic protein required for sporulation; also required for the ubiquitination of the gluconeogenic enzyme fructose-1,6-bisphosphatase, which is degraded  | 2.7 |
| YDL024C   | DIA3 | Protein of unknown function, involved in invasive and pseudohyphal growth                                                                                    | 2.7 |
| YPR078C   |      | Hypothetical protein                                                                                                                                         | 2.7 |
| YOL048C   |      | Hypothetical protein                                                                                                                                         | 2.7 |
| YDR222W   |      | Protein of unknown function; green fluorescent protein (GFP)-fusion protein localizes to the cytoplasm in a punctate pattern                                 | 2.7 |
| YAL062W   | GDH3 | NADP(+)-dependent glutamate dehydrogenase, synthesizes glutamate from ammonia and alpha-ketoglutarate; rate of alpha-ketoglutarate utilization differs       | 2.7 |
| YOL107W   |      | Hypothetical protein                                                                                                                                         | 2.7 |
| YMR170C   | ALD2 | Cytoplasmic aldehyde dehydrogenase, involved in ethanol oxidation and beta-alanine biosynthesis; uses NAD+ as the preferred coenzyme; expression is          | 2.7 |
| YBR108W   |      | Protein interacting with Rsv167p                                                                                                                             | 2.7 |
| YAR027W   | UIP3 | Putative integral membrane protein of unknown function; interacts with Ulp1p at the nuclear periphery; member of DUP240 gene family                          | 2.7 |
| YGR010C   | ADY2 | Acetate transporter required for normal sporulation                                                                                                          | 2.7 |
| YER103W   | SSA4 | Heat shock protein that is highly induced upon stress; plays a role in SRP-dependent cotranslational protein-membrane targeting and translocation;           | 2.7 |
| YLR099W-A |      | Putative protein of unknown function                                                                                                                         | 2.7 |
| YDR435C   | PPM1 | Carboxyl methyl transferase, methylates the C terminus of the protein phosphatase 2A catalytic subunit (Pph21p or Pph22p), which is important for            | 2.7 |
| YKR013W   | PRY2 | Protein of unknown function, has similarity to Pry1p and Pry3p and to the plant PR-1 class of pathogen related proteins                                      | 2.7 |
| YAL053W   | FLC2 | Putative FAD transporter; required for uptake of FAD into endoplasmic reticulum; involved in cell wall maintenance                                           | 2.7 |
| YFL059W   | SNZ3 | Member of a stationary phase-induced gene family; transcription of SNZ2 is induced prior to diauxic shift, and also in the absence of thiamin in a Thi2p-    | 2.7 |
| YDL057W   |      | Putative protein of unknown function; YDL057W is not an essential gene                                                                                       | 2.7 |

|         |       |                                                                                                                                                               |     |
|---------|-------|---------------------------------------------------------------------------------------------------------------------------------------------------------------|-----|
| YOR394W |       | Hypothetical protein /// Hypothetical protein                                                                                                                 | 2.7 |
| YNL015W | PBI2  | Cytosolic inhibitor of vacuolar proteinase B, required for efficient vacuole inheritance; with thioredoxin forms protein complex LMA1, which assists in       | 2.7 |
| YJL103C |       | Putative zinc cluster protein of unknown function; computationally predicted involvement in oxidative phosphorylation, based on patterns of expression and    | 2.7 |
| YKR011C |       | Putative protein of unknown function; green fluorescent protein (GFP)-fusion protein localizes to the nucleus                                                 | 2.7 |
| YMR303C | ADH2  | Glucose-repressible alcohol dehydrogenase II, catalyzes the conversion of ethanol to acetaldehyde; involved in the production of certain carboxylate          | 2.7 |
| YDL085W | NDE2  | Mitochondrial external NADH dehydrogenase, catalyzes the oxidation of cytosolic NADH; Nde1p and Nde2p are involved in providing the cytosolic                 | 2.7 |
| YNL024C |       | Putative protein of unknown function with seven beta-strand methyltransferase motif; green fluorescent protein (GFP)-fusion protein localizes to the          | 2.7 |
| YLR270W | DCS1  | Non-essential hydrolase involved in mRNA decapping, may function in a feedback mechanism to regulate deadenylation, contains pyrophosphatase                  | 2.7 |
| YDL027C |       | Putative protein of unknown function; green fluorescent protein (GFP)-fusion protein localizes to the mitochondrion; YDL027C is not an essential gene         | 2.6 |
| YIL117C | PRM5  | Pheromone-regulated protein, predicted to have 1 transmembrane segment; induced during cell integrity signaling                                               | 2.6 |
| YPL123C | RNY1  | RNAse; member of the T(2) family of endoribonucleases                                                                                                         | 2.6 |
| YPL166W | ATG29 | Protein specifically required for autophagy; may function in autophagosome formation at the pre-autophagosomal structure in collaboration with other          | 2.6 |
| YDR317W | HIM1  | Protein of unknown function involved in DNA repair                                                                                                            | 2.6 |
| YIL108W |       | Putative metalloprotease                                                                                                                                      | 2.6 |
| YPL222W |       | The authentic, non-tagged protein was localized to the mitochondria.                                                                                          | 2.6 |
| YJR008W |       | Putative protein of unknown function; expression repressed by inosine and choline in an Opi1p-dependent manner; expression induced by mild heat-stress        | 2.6 |
| YGR019W | UGA1  | Gamma-aminobutyrate (GABA) transaminase (4-aminobutyrate aminotransferase) involved in the 4-aminobutyrate and glutamate degradation                          | 2.6 |
| YER019W | ISC1  | Inositol phosphosphingolipid phospholipase C, hydrolyzes inositolphosphosphingolipids, activated by phosphatidylserine, cardiolipin, and                      | 2.6 |
| YDR275W | BSC2  | Protein of unknown function, ORF exhibits genomic organization compatible with a translational readthrough-dependent mode of expression                       | 2.6 |
| YPR198W | SGE1  | Membrane-associated multidrug transporter, acts as an extrusion permease, member of the drug-resistance protein family within the major facilitator           | 2.6 |
| YHR075C | PPE1  | Protein with carboxyl methyl esterase activity that may have a role in demethylation of the phosphoprotein phosphatase catalytic subunit; also                | 2.6 |
| YKL126W | YPK1  | Serine/threonine protein kinase required for receptor-mediated endocytosis; involved in sphingolipid-mediated and cell integrity signaling pathways;          | 2.6 |
| YOR035C | SHE4  | Protein containing a UCS (UNC-45/CRO1/SHE4) domain, binds to myosin motor domains to regulate myosin function; involved in endocytosis,                       | 2.6 |
| YML054C | CYB2  | Cytochrome b2 (L-lactate cytochrome-c oxidoreductase), component of the mitochondrial intermembrane space, required for lactate utilization; expression       | 2.6 |
| YBR045C | GIP1  | Meiosis-specific regulatory subunit of the Glc7p protein phosphatase, regulates spore wall formation and septin organization, required for expression of some | 2.6 |
| YKL091C |       | Putative homolog of Sec14p, which is a phosphatidylinositol/phosphatidylcholine transfer protein involved in lipid                                            | 2.6 |
| YPL067C |       | Hypothetical protein                                                                                                                                          | 2.6 |
| YKL142W | MRP8  | Putative mitochondrial ribosomal protein, has similarity to E. coli ribosomal protein S2                                                                      | 2.6 |

|           |       |                                                                                                                                                              |     |
|-----------|-------|--------------------------------------------------------------------------------------------------------------------------------------------------------------|-----|
| YNL014W   | HEF3  | Translational elongation factor EF-3; paralog of YEF3 and member of the ABC superfamily; stimulates EF-1 alpha-dependent binding of aminoacyl-tRNA by        | 2.6 |
| YJR079W   |       | Putative protein of unknown function; mutation results in impaired mitochondrial respiration                                                                 | 2.5 |
| YGL259W   | YPS5  | Protein with similarity to GPI-anchored aspartic proteases such as Yap1p and Yap3p                                                                           | 2.5 |
| YNR010W   | CSE2  | Component of the Med9/10 module, which is a subcomplex within the RNA polymerase II Mediator complex; required for regulation of RNA polymerase II           | 2.5 |
| YJL045W   |       | Minor succinate dehydrogenase isozyme; homologous to Sdh1p, the major isozyme responsible for the oxidation of succinate and transfer of electrons to        | 2.5 |
| YLR214W   | FRE1  | Ferric reductase and cupric reductase, reduces siderophore-bound iron and oxidized copper prior to uptake by transporters; expression induced by low         | 2.5 |
| YPL171C   | OYE3  | Widely conserved NADPH oxidoreductase containing flavin mononucleotide (FMN), homologous to Oye2p with slight differences in ligand binding and              | 2.5 |
| YDR030C   | RAD28 | Protein involved in transcription-coupled repair nucleotide excision repair of UV-induced DNA lesions; homolog of human CSA protein                          | 2.5 |
| YFL040W   |       | Putative protein of unknown function; YFL040W is not an essential gene                                                                                       | 2.5 |
| YGL051W   | MST27 | Putative integral membrane protein, involved in vesicle formation; forms complex with Mst28p; member of DUP240 gene family; binds COPI and COPII             | 2.5 |
| YDL239C   | ADY3  | Protein required for spore wall formation, thought to mediate assembly of a Don1p-containing structure at the leading edge of the prospore membrane via      | 2.5 |
| YPR154W   | PIN3  | Protein that induces appearance of [PIN+] prion when overproduced                                                                                            | 2.5 |
| YLR417W   | VPS36 | Component of the ESCRT-II complex; contains the GLUE (GRAM Like Ubiquitin binding in EAP45) domain which is involved in interactions with                    | 2.5 |
| YPR081C   | GRS2  | Protein with sequence similarity to Grs1p, which is a glycyl-tRNA synthetase; cannot substitute for Grs1p; possible pseudogene that is expressed at very low | 2.5 |
| YPR030W   | CSR2  | Nuclear protein with a potential regulatory role in utilization of galactose and nonfermentable carbon sources; overproduction suppresses the lethality at   | 2.5 |
| YGL038C   | OCH1  | Mannosyltransferase of the cis-Golgi apparatus, initiates the polymannose outer chain elongation of N-linked oligosaccharides of glycoproteins               | 2.5 |
| YCR083W   | TRX3  | Mitochondrial thioredoxin, highly conserved oxidoreductase required to maintain the redox homeostasis of the cell, forms the mitochondrial thioredoxin       | 2.5 |
| YKL103C   | LAP4  | Vacuolar aminopeptidase, often used as a marker protein in studies of autophagy and cytosol to vacuole targeting (CVT) pathway                               | 2.5 |
| YMR087W   |       | Putative ADP-ribose-1"-monophosphatase that converts ADP-ribose-1"-monophosphate to ADP-ribose; may have a role in tRNA splicing; contains an                | 2.5 |
| YDL238C   | GUD1  | Guanine deaminase, a catabolic enzyme of the guanine salvage pathway producing xanthine and ammonia from guanine; activity is low in exponentially-          | 2.4 |
| YMR090W   |       | Putative protein of unknown function with similarity to DTDP-glucose 4,6-dehydratases; green fluorescent protein (GFP)-fusion protein localizes to the       | 2.4 |
| YLR271W   |       | Putative protein of unknown function; green fluorescent protein (GFP)-fusion protein localizes to the cytoplasm and the nucleus; YLR271W is not an           | 2.4 |
| YDR285W   | ZIP1  | Transverse filament protein of the synaptonemal complex; required for normal levels of meiotic recombination and pairing between homologous chromosome       | 2.4 |
| YLR241W   |       | Hypothetical protein                                                                                                                                         | 2.4 |
| YLR213C   | CRR1  | Putative glycoside hydrolase of the spore wall envelope; required for normal spore wall assembly, possibly for cross-linking between the glucan and          | 2.4 |
| YDR077W   | SED1  | Major stress-induced structural GPI-cell wall glycoprotein in stationary-phase cells, associates with translating ribosomes, possible role in mitochondrial  | 2.4 |
| YJL094C   | KHA1  | Putative K <sup>+</sup> /H <sup>+</sup> antiporter                                                                                                           | 2.4 |
| YLR307C-A |       | Putative protein of unknown function                                                                                                                         | 2.4 |

|         |       |                                                                                                                                                             |     |
|---------|-------|-------------------------------------------------------------------------------------------------------------------------------------------------------------|-----|
| YLR094C | GIS3  | Protein of unknown function                                                                                                                                 | 2.4 |
| YDR218C | SPR28 | Sporulation-specific homolog of the yeast CDC3/10/11/12 family of bud neck microfilament genes; meiotic septin expressed at high levels during meiotic      | 2.4 |
| YER169W | RPH1  | Transcriptional repressor of PHR1, which is a photolyase induced by DNA damage; binds to AG(4) (C(4)T) sequence upstream of PHR1; Rph1p                     | 2.4 |
| YML130C | ERO1  | Glycoprotein required for oxidative protein folding in the endoplasmic reticulum                                                                            | 2.4 |
| YGL242C |       | Putative protein of unknown function; deletion mutant is viable                                                                                             | 2.4 |
| YAL028W | FRT2  | Tail-anchored endoplasmic reticulum membrane protein, interacts with homolog Frt1p but is not a substrate of calcineurin (unlike Frt1p), promotes           | 2.4 |
| YGL037C | PNC1  | Nicotinamidase that converts nicotinamide to nicotinic acid as part of the NAD(+) salvage pathway, required for life span extension by calorie restriction; | 2.4 |
| YNL157W |       | Hypothetical protein                                                                                                                                        | 2.4 |
| YIR038C | GTT1  | ER associated glutathione S-transferase capable of homodimerization; expression induced during the diauxic shift and throughout stationary phase;           | 2.4 |
| YKR097W | PCK1  | Phosphoenolpyruvate carboxykinase, key enzyme in gluconeogenesis, catalyzes early reaction in carbohydrate biosynthesis, glucose represses                  | 2.4 |
| YKL129C | MYO3  | One of two type I myosins; localizes to actin cortical patches; deletion of MYO3 has little effect on growth, but myo3 myo5 double deletion causes severe   | 2.4 |
| YMR009W | ADI1  | Acireductone dioxygenase involved in the methionine salvage pathway; ortholog of human MTCBP-1; transcribed with YMR010W and regulated post-                | 2.4 |
| YGL249W | ZIP2  | Meiosis-specific protein involved in normal synaptonemal complex formation and pairing between homologous chromosomes during meiosis                        | 2.4 |
| YLR345W |       | Similar to 6-phosphofructo-2-kinase/fructose-2,6-bisphosphatase enzymes responsible for the metabolism of fructoso-2,6-bisphosphate; mRNA                   | 2.4 |
| YCL033C |       | Putative protein-methionine-R-oxide reductase; involved in response to oxidative stress; similar to mouse Sepx1p and fly SelRp; YCL033C is not an           | 2.4 |
| YML042W | CAT2  | Carnitine acetyl-CoA transferase present in both mitochondria and peroxisomes, transfers activated acetyl groups to carnitine to form                       | 2.4 |
| YDR122W | KIN1  | Serine/threonine protein kinase involved in regulation of exocytosis; localizes to the cytoplasmic face of the plasma membrane; closely related to Kin2p    | 2.4 |
| YFL020C | PAU5  | Part of 23-member seripauperin multigene family encoded mainly in subtelomeric regions, active during alcoholic fermentation, regulated by                  | 2.4 |
| YFL012W |       | Putative protein of unknown function; transcribed during sporulation; null mutant exhibits increased resistance to rapamycin                                | 2.3 |
| YMR258C |       | Protein of unknown function with similarity to F-box proteins; physically interacts with Skp1p; green fluorescent protein (GFP)-fusion protein localizes    | 2.3 |
| YNL165W |       | Hypothetical protein                                                                                                                                        | 2.3 |
| YDR486C | VPS60 | Cytoplasmic and vacuolar membrane protein involved in late endosome to vacuole transport; required for normal filament maturation during pseudohyphal       | 2.3 |
| YDR436W | PPZ2  | Serine/threonine protein phosphatase Z, isoform of Ppz1p; involved in regulation of potassium transport, which affects osmotic stability, cell cycle        | 2.3 |
| YMR114C |       | Protein of unknown function; green fluorescent protein (GFP)-fusion protein localizes to the nucleus and cytoplasm; YMR114C is not an essential gene        | 2.3 |
| YOL082W | ATG19 | Protein involved in the cytoplasm-to-vacuole targeting pathway and in autophagy, recognizes cargo proteins and delivers them to the                         | 2.3 |
| YNL305C |       | Hypothetical protein                                                                                                                                        | 2.3 |
| YGL045W | RIM8  | Protein of unknown function, involved in the proteolytic activation of Rim101p in response to alkaline pH; has similarity to A. nidulans PalF               | 2.3 |
| YDL243C | AAD4  | Putative aryl-alcohol dehydrogenase with similarity to P. chrysosporium aryl-alcohol dehydrogenase, involved in the oxidative stress response               | 2.3 |

|         |       |                                                                                                                                                                                     |     |
|---------|-------|-------------------------------------------------------------------------------------------------------------------------------------------------------------------------------------|-----|
| YEL020C |       | Hypothetical protein with low sequence identity to Pdc1p                                                                                                                            | 2.3 |
| YDL010W |       | Putative thiol-disulfide oxidoreductase; green fluorescent protein (GFP)-fusion protein localizes to the vacuole; YDL010W is not an essential gene                                  | 2.3 |
| YOR275C | RIM20 | Protein involved in proteolytic activation of Rim101p in response to alkaline pH; member of the PalA/AIP1/Alix family; interacts with the ESCRT-III subunits                        | 2.3 |
| YIL017C | VID28 | Protein involved in proteasome-dependent catabolite degradation of fructose-1,6-bisphosphatase (FBPase); localized to the nucleus and the cytoplasm                                 | 2.3 |
| YLR216C | CPR6  | Peptidyl-prolyl cis-trans isomerase (cyclophilin), catalyzes the cis-trans isomerization of peptide bonds N-terminal to proline residues; binds to Hsp82p                           | 2.3 |
| YHR104W | GRE3  | Aldose reductase involved in methylglyoxal, d-xylose and arabinose metabolism; stress induced (osmotic, ionic, oxidative, heat shock, starvation)                                   | 2.3 |
| YBR269C |       | The authentic, non-tagged protein was localized to the mitochondria                                                                                                                 | 2.3 |
| YIL010W | DOT5  | Nuclear thiol peroxidase which functions as an alkyl-hydroperoxide reductase during post-diauxic growth                                                                             | 2.3 |
| YJL165C | HAL5  | Putative protein kinase; overexpression increases sodium and lithium tolerance, whereas gene disruption increases cation and low pH sensitivity and                                 | 2.3 |
| YMR165C | PAH1  | Mg <sup>2+</sup> -dependent phosphatidate (PA) phosphatase, catalyzes the dephosphorylation of PA to yield diacylglycerol and Pi, responsible for de novo                           | 2.3 |
| YDR059C | UBC5  | Ubiquitin-conjugating enzyme that mediates selective degradation of short-lived and abnormal proteins, central component of the cellular stress response;                           | 2.3 |
| YDR403W | DIT1  | Sporulation-specific enzyme required for spore wall maturation, involved in the production of a soluble LL-dityrosine-containing precursor of the spore wall;                       | 2.3 |
| YNL020C | ARK1  | Serine/threonine protein kinase involved in regulation of the cortical actin cytoskeleton; involved in control of endocytosis                                                       | 2.3 |
| YOR389W |       | Hypothetical protein                                                                                                                                                                | 2.3 |
| YHR004C | NEM1  | Protein of the nuclear envelope required for the spherical shape of the nucleus; required for normal sporulation                                                                    | 2.3 |
| YIL073C | SPO22 | Meiosis-specific protein with similarity to phospholipase A2, involved in completion of nuclear divisions during meiosis; induced early in meiosis                                  | 2.3 |
| YPR134W | MSS18 | Nuclear encoded protein needed for efficient splicing of mitochondrial COX1 a15beta intron; mss18 mutations block cleavage of 5' exon - intron junction;                            | 2.3 |
| YPL154C | PEP4  | Vacuolar aspartyl protease (proteinase A), required for the posttranslational precursor maturation of vacuolar proteinases; synthesized as a zymogen, self-                         | 2.3 |
| YER130C |       | Hypothetical protein                                                                                                                                                                | 2.3 |
| YPL110C | GDE1  | Major cellular glycerophosphocholine (GroPCho) phosphodiesterase; hydrolyzes GroPCho to choline and glycerolphosphate after its uptake by Git1p                                     | 2.3 |
| YOL032W | OPI10 | Protein with a possible role in phospholipid biosynthesis, based on inositol-excreting phenotype of the null mutant and its suppression by exogenous                                | 2.3 |
| YOR177C | MPC54 | Component of the meiotic outer plaque, a membrane-organizing center which is assembled on the cytoplasmic face of the spindle pole body during meiosis II                           | 2.3 |
| YLR350W | ORM2  | Evolutionarily conserved protein with similarity to Orm1p, required for resistance to agents that induce the unfolded protein response; human                                       | 2.3 |
| YGL227W | VID30 | Protein involved in proteasome-dependent catabolite degradation of fructose-1,6-bisphosphatase (FBPase); shifts the balance of nitrogen metabolism                                  | 2.3 |
| YJL036W | SNX4  | Sorting nexin, involved in the retrieval of late-Golgi SNAREs from the post-Golgi endosome to the trans-Golgi network and in cytoplasm to vacuole                                   | 2.3 |
| YOR162C | YRR1  | Zn <sup>2+</sup> -Cys <sup>6</sup> zinc-finger transcription factor that activates genes involved in multidrug resistance; paralog of Yrm1p, acting on an overlapping set of target | 2.3 |
| YOR062C |       | Protein of unknown function; similar to YKR075Cp and Reg1p; expression regulated by glucose and Rgt1p                                                                               | 2.3 |
| YGR057C | LST7  | Protein possibly involved in a post-Golgi secretory pathway; required for the transport of nitrogen-regulated amino acid permease Gap1p from the Golgi to                           | 2.3 |

|           |       |                                                                                                                                                                      |     |
|-----------|-------|----------------------------------------------------------------------------------------------------------------------------------------------------------------------|-----|
| YFL044C   | OTU1  | Deubiquitylation enzyme that binds to the chaperone-ATPase Cdc48p; may contribute to regulation of protein degradation by deubiquitylating substrates                | 2.3 |
| YMR105W-A |       | Putative protein of unknown function                                                                                                                                 | 2.3 |
| YML057W   | CMP2  | Calcineurin A; one isoform (the other is CNA1) of the catalytic subunit of calcineurin, a Ca <sup>++</sup> /calmodulin-regulated protein phosphatase which regulates | 2.3 |
| YAL034C   | FUN19 | Non-essential protein of unknown function                                                                                                                            | 2.3 |
| YOR274W   | MOD5  | Delta 2-isopentenyl pyrophosphate:tRNA isopentenyl transferase, required for biosynthesis of the modified base isopentenyladenosine in mitochondrial and             | 2.3 |
| YPL167C   | REV3  | Catalytic subunit of DNA polymerase zeta, which is involved in DNA repair and translesion synthesis; required for mutagenesis induced by DNA damage                  | 2.3 |
| YKL150W   | MCR1  | Mitochondrial NADH-cytochrome b5 reductase, involved in ergosterol biosynthesis                                                                                      | 2.2 |
| YER143W   | DDI1  | DNA damage-inducible v-SNARE binding protein, contains a ubiquitin-associated (UBA) domain, may act as a negative regulator of constitutive                          | 2.2 |
| YML131W   |       | Putative protein of unknown function with similarity to oxidoreductases; mRNA expression is increased in a HOG1 and SKO1-dependent manner after osmotic              | 2.2 |
| YEL012W   | UBC8  | Ubiquitin-conjugating enzyme that negatively regulates gluconeogenesis by mediating the glucose-induced ubiquitination of fructose-1,6-bisphosphatase                | 2.2 |
| YNL134C   |       | Putative protein of unknown function with similarity to dehydrogenases from other model organisms; green fluorescent protein (GFP)-fusion protein                    | 2.2 |
| YGR036C   | CAX4  | Dolichyl pyrophosphate (Dol-P-P) phosphatase with a lumenally oriented active site in the ER, cleaves the anhydride linkage in Dol-P-P, required for Dol-P-P-        | 2.2 |
| YMR095C   | SNO1  | Protein of unconfirmed function, involved in pyridoxine metabolism; expression is induced during stationary phase; forms a putative glutamine                        | 2.2 |
| YBR006W   | UGA2  | Succinate semialdehyde dehydrogenase involved in the utilization of gamma-aminobutyrate (GABA) as a nitrogen source; part of the 4-aminobutyrate and                 | 2.2 |
| YHR105W   | YPT35 | Endosomal protein of unknown function that contains a phox (PX) homology domain and binds to both phosphatidylinositol-3-phosphate (PtdIns(3)P) and                  | 2.2 |
| YJR151C   | DAN4  | Cell wall mannoprotein with similarity to Tir1p, Tir2p, Tir3p, and Tir4p; expressed under anaerobic conditions, completely repressed during aerobic                  | 2.2 |
| YPL249C   | GYP5  | GTPase-activating protein (GAP) for yeast Rab family members, involved in ER to Golgi trafficking; exhibits GAP activity toward Ypt1p that is stimulated by          | 2.2 |
| YLR337C   | VRP1  | Proline-rich actin-associated protein involved in cytoskeletal organization and cytokinesis; related to mammalian Wiskott-Aldrich syndrome protein (WASP)-           | 2.2 |
| YML070W   | DAK1  | Dihydroxyacetone kinase, required for detoxification of dihydroxyacetone (DHA); involved in stress adaptation                                                        | 2.2 |
| YAL010C   | MDM10 | Subunit of the mitochondrial sorting and assembly machinery (SAM complex); has a role in assembly of the TOM complex, which mediates protein import                  | 2.2 |
| YHR016C   | YSC84 | Protein involved in the organization of the actin cytoskeleton; contains SH3 domain similar to Rvs167p                                                               | 2.2 |
| YMR304W   | UBP15 | Ubiquitin-specific protease that may play a role in ubiquitin precursor processing                                                                                   | 2.2 |
| YOR018W   | ROD1  | Membrane protein; overexpression confers resistance to the GST substrate o-dinitrobenzene as well as to zinc and calcium; contains 2 PY motifs, which are            | 2.2 |
| YLR225C   |       | Putative protein of unknown function; green fluorescent protein (GFP)-fusion protein localizes to the cytoplasm; YLR225C is not an essential gene                    | 2.2 |
| YPL087W   | YDC1  | Alkaline dihydroceramidase, involved in sphingolipid metabolism; preferentially hydrolyzes dihydroceramide to a free fatty acid and dihydrosphingosine; has a        | 2.2 |
| YLR047C   | FRE8  | Protein with sequence similarity to iron/copper reductases, involved in iron homeostasis; deletion mutant has iron deficiency/accumulation growth defects;           | 2.2 |
| YOL132W   | GAS4  | Putative 1,3-beta-glucanosyltransferase, has similarity to Gas1p; localizes to the cell wall                                                                         | 2.2 |
| YOR175C   |       | Member of the MBOAT family of putative membrane-bound O-acyltransferases                                                                                             | 2.2 |



|           |       |                                                                                                                                                                |     |
|-----------|-------|----------------------------------------------------------------------------------------------------------------------------------------------------------------|-----|
| YOL104C   | NDJ1  | Meiosis-specific telomere protein, required for bouquet formation, effective homolog pairing, ordered cross-over distribution (interference), sister chromatid | 2.2 |
| YPR127W   |       | Hypothetical protein                                                                                                                                           | 2.2 |
| YFL057C   | AAD16 | alcohol dehydrogenase; mutational analysis has not yet revealed a physiological role                                                                           | 2.2 |
| YDL072C   | YET3  | Endoplasmic reticulum transmembrane protein, homolog of human BAP31 protein                                                                                    | 2.2 |
| YER015W   | FAA2  | Long chain fatty acyl-CoA synthetase; accepts a wider range of acyl chain lengths than Faa1p, preferring C9:0-C13:0; involved in the activation of             | 2.2 |
| YBR170C   | NPL4  | Endoplasmic reticulum and nuclear membrane protein, forms a complex with Cdc48p and Ufd1p that recognizes ubiquitinated proteins in the endoplasmic            | 2.2 |
| YGL056C   | SDS23 | One of two <i>S. cerevisiae</i> homologs (Sds23p and Sds24p) of the <i>Schizosaccharomyces pombe</i> Sds23 protein, which genetic studies have                 | 2.2 |
| YGR223C   | HSV2  | Phosphatidylinositol 3,5-bisphosphate-binding protein, predicted to fold as a seven-bladed beta-propeller; displays punctate cytoplasmic localization          | 2.1 |
| YOR020W-A |       | Identified by homology to <i>Ashbya gossypii</i>                                                                                                               | 2.1 |
| YER142C   | MAG1  | 3-methyl-adenine DNA glycosylase involved in protecting DNA against alkylating agents; initiates base excision repair by removing damaged bases to             | 2.1 |
| YCL035C   | GRX1  | Hydroperoxide and superoxide-radical responsive heat-stable glutathione-dependent disulfide oxidoreductase with active site cysteine pair; protects cells      | 2.1 |
| YJR106W   | ECM27 | Non-essential protein of unknown function                                                                                                                      | 2.1 |
| YPR026W   | ATH1  | Acid trehalase required for utilization of extracellular trehalose                                                                                             | 2.1 |
| YOL087C   |       | Hypothetical protein                                                                                                                                           | 2.1 |
| YDR490C   | PKH1  | Serine/threonine protein kinase involved in sphingolipid-mediated signaling pathway that controls endocytosis; activates Ypk1p and Ykr2p, components of        | 2.1 |
| YGL144C   | ROG1  | Protein with putative serine active lipase domain                                                                                                              | 2.1 |
| YOL071W   | EMI5  | Non-essential protein of unknown function required for transcriptional induction of the early meiotic-specific transcription factor IME1, also required for    | 2.1 |
| YOL013C   | HRD1  | Ubiquitin-protein ligase required for endoplasmic reticulum-associated degradation (ERAD) of misfolded proteins; genetically linked to the unfolded            | 2.1 |
| YKL133C   |       | Hypothetical protein                                                                                                                                           | 2.1 |
| YPL163C   | SVS1  | Cell wall and vacuolar protein, required for wild-type resistance to vanadate                                                                                  | 2.1 |
| YDR530C   | APA2  | Diadenosine 5',5''-P1,P4-tetraphosphate phosphorylase II (AP4A phosphorylase), involved in catabolism of bis(5'-nucleosidyl) tetraphosphates;                  | 2.1 |
| YLR438W   | CAR2  | L-ornithine transaminase (OTase), catalyzes the second step of arginine degradation, expression is dually-regulated by allophanate induction and a             | 2.1 |
| YHL002W   | HSE1  | Subunit of the endosomal Vps27p-Hse1p complex required for sorting of ubiquitinated membrane proteins into intraluminal vesicles prior to vacuolar             | 2.1 |
| YKL037W   |       | Putative protein of unknown function                                                                                                                           | 2.1 |
| YOR347C   | PYK2  | Pyruvate kinase that appears to be modulated by phosphorylation; PYK2 transcription is repressed by glucose, and Pyk2p may be active under low                 | 2.1 |
| YMR238W   | DFG5  | Putative mannosidase, essential glycosylphosphatidylinositol (GPI)-anchored membrane protein required for cell wall biogenesis in bud formation, involved in   | 2.1 |
| YER163C   |       | Hypothetical protein                                                                                                                                           | 2.1 |
| YOL018C   | TLG2  | Syntaxin-like t-SNARE that forms a complex with Tlg1p and Vti1p and mediates fusion of endosome-derived vesicles with the late Golgi; binds                    | 2.1 |

|           |       |                                                                                                                                                               |     |
|-----------|-------|---------------------------------------------------------------------------------------------------------------------------------------------------------------|-----|
| YPL119C-A |       | Identified by expression profiling and mass spectrometry                                                                                                      | 2.1 |
| YNL195C   |       | Hypothetical protein                                                                                                                                          | 2.1 |
| YDR123C   | INO2  | Component of the heteromeric Ino2p/Ino4p basic helix-loop-helix transcription activator that binds inositol/choline-responsive elements (ICREs), required for | 2.1 |
| YJL171C   |       | GPI-anchored cell wall protein of unknown function; induced in response to cell wall damaging agents and by mutations in genes involved in cell wall          | 2.1 |
| YKL007W   | CAP1  | Alpha subunit of the capping protein (CP) heterodimer (Cap1p and Cap2p) which binds to the barbed ends of actin filaments preventing further                  | 2.1 |
| YBR223C   | TDP1  | Tyrosyl-DNA Phosphodiesterase I, hydrolyzes 3'-phosphotyrosyl bonds to generate 3'-phosphate DNA and tyrosine, involved in the repair of DNA lesions          | 2.1 |
| YLR257W   |       | Hypothetical protein                                                                                                                                          | 2.1 |
| YIL107C   | PFK26 | 6-phosphofructo-2-kinase, inhibited by phosphoenolpyruvate and sn-glycerol 3-phosphate, has negligible fructose-2,6-bisphosphatase activity, transcriptional  | 2.1 |
| YIL065C   | FIS1  | Mitochondrial outer membrane protein involved in membrane fission, required for localization of Dnm1p and Mdv1p during mitochondrial division                 | 2.1 |
| YOL055C   | THI20 | Hydroxymethylpyrimidine phosphate kinase, involved in the last steps in thiamine biosynthesis; member of a gene family with THI21 and THI22;                  | 2.1 |
| YJL016W   |       | Putative protein of unknown function; GFP-fusion protein localizes to the cytoplasm; conserved in closely related Saccharomyces species                       | 2.1 |
| YLR362W   | STE11 | Signal transducing MEK kinase involved in pheromone response and pseudohyphal/invasive growth pathways where it phosphorylates Ste7p, and                     | 2.1 |
| YFR012W-A |       | Putative protein of unknown function; identified by homology                                                                                                  | 2.1 |
| YPL017C   |       | Putative S-adenosylmethionine-dependent methyltransferase of the seven beta-strand family; null mutant displays increased levels of spontaneous Rad52 foci    | 2.1 |
| YHR015W   | MIP6  | Putative RNA-binding protein, interacts with Mex67p, which is a component of the nuclear pore involved in nuclear mRNA export                                 | 2.1 |
| YDL206W   |       | Hypothetical protein                                                                                                                                          | 2.1 |
| YCR036W   | RBK1  | Putative ribokinase                                                                                                                                           | 2.1 |
| YPL119C   | DBP1  | Putative ATP-dependent RNA helicase of the DEAD-box protein family; mutants show reduced stability of the 40S ribosomal subunit scanning through              | 2.1 |
| YKL064W   | MNR2  | Putative magnesium transporter; has similarity to Alr1p and Alr2p, which mediate influx of Mg <sup>2+</sup> and other divalent cations                        | 2.1 |
| YOL015W   |       | Hypothetical protein; null mutant displays increased levels of spontaneous Rad52 foci                                                                         | 2.1 |
| YDR107C   |       | multispanning membrane protein                                                                                                                                | 2.1 |
| YOR153W   | PDR5  | Short-lived membrane ABC (ATP-binding cassette) transporter, actively exports various drugs, expression regulated by Pdr1p; also involved in steroid          | 2.1 |
| YFL056C   | AAD6  | Putative aryl-alcohol dehydrogenase with similarity to P. chrysosporium aryl-alcohol dehydrogenase, involved in the oxidative stress response                 | 2.0 |
| YMR110C   | HFD1  | Putative fatty aldehyde dehydrogenase, located in the mitochondrial outer membrane and also in lipid particles; has similarity to human fatty aldehyde        | 2.0 |
| YPL057C   | SUR1  | Probable catalytic subunit of a mannosylinositol phosphorylceramide (MIPC) synthase, forms a complex with probable regulatory subunit Csg2p; function in      | 2.0 |
| YGR295C   | COS6  | Protein of unknown function, member of the DUP380 subfamily of conserved, often subtelomerically-encoded proteins                                             | 2.0 |
| YML007C-A |       | Putative protein of unknown function; green fluorescent protein (GFP)-fusion protein localizes to mitochondria                                                | 2.0 |
| YPR172W   |       | Protein of unknown function, transcriptionally activated by Yrm1p along with genes involved in multidrug resistance                                           | 2.0 |

|           |       |                                                                                                                                                          |     |
|-----------|-------|----------------------------------------------------------------------------------------------------------------------------------------------------------|-----|
| YNL003C   | PET8  | S-adenosylmethionine transporter of the mitochondrial inner membrane, member of the mitochondrial carrier family; required for biotin biosynthesis and   | 2.0 |
| YKL051W   | SFK1  | Plasma membrane protein that may act together with or upstream of Stt4p to generate normal levels of the essential phospholipid PI4P, at least partially | 2.0 |
| YFL062W   | COS4  | Protein of unknown function, member of the DUP380 subfamily of conserved, often subtelomerically-encoded proteins                                        | 2.0 |
| YDR406W   | PDR15 | ATP binding cassette (ABC) transporter of the plasma membrane; general stress response factor implicated in cellular detoxification; target of Pdr1p,    | 2.0 |
| YLR361C-A |       | Putative protein of unknown function                                                                                                                     | 2.0 |
| YGR287C   |       | Putative protein of unknown function; similarity to alpha-D-glucosidase (maltase); localizes to the mitochondrion                                        | 2.0 |
| YOR052C   |       | Hypothetical protein                                                                                                                                     | 2.0 |
| YJL185C   |       | Putative protein of unknown function; mRNA is weakly cell cycle regulated, peaking in G2 phase; YJL185C is a non-essential gene                          | 2.0 |
| YML002W   |       | Hypothetical protein                                                                                                                                     | 2.0 |
| YLR093C   | NYV1  | v-SNARE component of the vacuolar SNARE complex involved in vesicle fusion; inhibits ATP-dependent Ca(2+) transport activity of Pmc1p in the             | 2.0 |
| YGR141W   | VPS62 | Vacuolar protein sorting (VPS) protein required for cytoplasm to vacuole targeting of proteins                                                           | 2.0 |
| YDR216W   | ADR1  | Carbon source-responsive zinc-finger transcription factor, required for transcription of the glucose-repressed gene ADH2, of peroxisomal protein         | 2.0 |
| YPL203W   | TPK2  | Subunit of cytoplasmic cAMP-dependent protein kinase, which contains redundant catalytic subunits Tpk1p, Tpk2p, and Tpk3p and regulatory subunit         | 2.0 |
| YGL180W   | ATG1  | Protein serine/threonine kinase, required for autophagy and for the cytoplasm-to-vacuole targeting (Cvt) pathway                                         | 2.0 |
| YLR024C   | UBR2  | Cytoplasmic ubiquitin-protein ligase (E3)                                                                                                                | 2.0 |
| YMR271C   | URA10 | One of two orotate phosphoribosyltransferase isozymes (see also URA5) that catalyze the fifth enzymatic step in the de novo biosynthesis of pyrimidines, | 2.0 |
| YKL188C   | PXA2  | Subunit of a heterodimeric peroxisomal ATP-binding cassette transporter complex (Pxa1p-Pxa2p), required for import of long-chain fatty acids into        | 2.0 |
| YMR119W   | ASI1  | Putative integral membrane E3 ubiquitin ligase; genetic interactions suggest a role in negative regulation of amino acid uptake                          | 2.0 |
| YGR028W   | MSP1  | Mitochondrial protein involved in sorting of proteins in the mitochondria; putative membrane-spanning ATPase                                             | 2.0 |
| YPL179W   | PPQ1  | Putative protein serine/threonine phosphatase; null mutation enhances efficiency of translational suppressors                                            | 2.0 |
| YOR005C   | DNL4  | DNA ligase required for nonhomologous end-joining (NHEJ), forms stable heterodimer with required cofactor Lif1p, catalyzes DNA ligation as part of a     | 2.0 |
| YBL039W-A |       | Putative protein of unknown function                                                                                                                     | 2.0 |
| YOR176W   | HEM15 | Ferrochelatase, a mitochondrial inner membrane protein, catalyzes the insertion of ferrous iron into protoporphyrin IX, the eighth and final step in the | 2.0 |
| YBR126C   | TPS1  | Synthase subunit of trehalose-6-phosphate synthase/phosphatase complex, which synthesizes the storage carbohydrate trehalose; also found in a            | 2.0 |
| YGR127W   |       | Hypothetical protein                                                                                                                                     | 2.0 |
| YKR009C   | FOX2  | Multifunctional enzyme of the peroxisomal fatty acid beta-oxidation pathway; has 3-hydroxyacyl-CoA dehydrogenase and enoyl-CoA hydratase activities      | 2.0 |
| YDL214C   | PRR2  | Protein kinase with a possible role in MAP kinase signaling in the pheromone response pathway                                                            | 2.0 |
| YBL005W-A |       | Retrotransposon TYA Gag gene co-transcribed with TYB Pol; translated as TYA or TYA-TYB polyprotein; Gag is a nucleocapsid protein that is the            | 2.0 |

|         |         |                                                                                                                                                                  |      |
|---------|---------|------------------------------------------------------------------------------------------------------------------------------------------------------------------|------|
| YCR091W | KIN82   | Putative serine/threonine protein kinase, most similar to cyclic nucleotide-dependent protein kinase subfamily and the protein kinase C subfamily                | 2.0  |
| YBR230C | OM14    | Integral mitochondrial outer membrane protein; abundance is decreased in cells grown in glucose relative to other carbon sources; appears to contain 3           | 2.0  |
| YFR003C | YPI1    | Inhibitor of the type I protein phosphatase Glc7p, which is involved in regulation of a variety of metabolic processes; overproduction causes decreased cellular | 2.0  |
| YOL011W | PLB3    | Phospholipase B (lysophospholipase) involved in phospholipid metabolism; hydrolyzes phosphatidylinositol and phosphatidylserine and displays                     | 2.0  |
| YPL277C |         | Hypothetical protein /// Hypothetical protein                                                                                                                    | 2.0  |
| YCR014C | POL4    | DNA polymerase IV, undergoes pair-wise interactions with Dnl4p-Lif1p and Rad27p to mediate repair of DNA double-strand breaks by non-homologous                  | 2.0  |
| YDR003W | RCR2    | Probable integral membrane protein with similarity to Rcr1p; C-terminal region can functionally replace the corresponding region of Rcr1p in conferring Congo    | 2.0  |
| YHR161C | YAP1801 | Protein involved in clathrin cage assembly; binds Pan1p and clathrin; homologous to Yap1802p, member of the AP180 protein family                                 | 2.0  |
| YKL144C | RPC25   | RNA polymerase III subunit C25                                                                                                                                   | -2.0 |
| YCR084C | TUP1    | General repressor of transcription, forms complex with Cyc8p, involved in the establishment of repressive chromatin structure through interactions with          | -2.0 |
| YCR075C | ERS1    | Protein with similarity to human cystinosin, which is a H(+)-driven transporter involved in L-cystine export from lysosomes and implicated in the disease        | -2.0 |
| YOL119C | MCH4    | Protein with similarity to mammalian monocarboxylate permeases, which are involved in transport of monocarboxylic acids across the plasma membrane;              | -2.0 |
| YPR137W | RRP9    | Protein involved in pre-rRNA processing, associated with U3 snRNP; component of small ribosomal subunit (SSU) processosome; ortholog of the                      | -2.0 |
| YHR149C | SKG6    | Protein of unknown function; found in the bud tip and bud neck, potential Cdc28p substrate; Skg6p interacts with Zds1p and Zds2p                                 | -2.0 |
| YNL268W | LYP1    | Lysine permease; one of three amino acid permeases (Alp1p, Can1p, Lyp1p) responsible for uptake of cationic amino acids                                          | -2.0 |
| YDL036C | PUS9    | Mitochondrial tRNA pseudouridine synthase involved in pseudouridylation of mitochondrial tRNAs at position 32                                                    | -2.0 |
| YHR197W | RIX1    | Essential protein involved in the processing of the ITS2 region of the rRNA locus; required for the maturation and nuclear export of the 60S ribosomal           | -2.0 |
| YDR044W | HEM13   | Coproporphyrinogen III oxidase, an oxygen requiring enzyme that catalyzes the sixth step in the heme biosynthetic pathway; localizes to the mitochondrial        | -2.0 |
| YKR081C | RPF2    | Essential protein involved in the processing of pre-rRNA and the assembly of the 60S ribosomal subunit; interacts with ribosomal protein L11; localizes          | -2.0 |
| YAL067C | SEO1    | Putative permease, member of the allantoin transporter subfamily of the major facilitator superfamily; mutation confers resistance to ethionine sulfoxide        | -2.0 |
| YPL267W |         | Protein of unknown function, potential Cdc28p substrate                                                                                                          | -2.0 |
| YGR041W | BUD9    | Protein involved in bud-site selection; diploid mutants display a unipolar budding pattern instead of the wild-type bipolar pattern, and bud at the distal       | -2.0 |
| YIL118W | RHO3    | Non-essential small GTPase of the Rho/Rac subfamily of Ras-like proteins involved in the establishment of cell polarity; GTPase activity positively              | -2.0 |
| YAR008W | SEN34   | Subunit of the tRNA splicing endonuclease, which is composed of Sen2p, Sen15p, Sen34p, and Sen54p; Sen34p contains the active site for tRNA 3'                   | -2.0 |
| YBL004W | UTP20   | Component of the small-subunit (SSU) processosome, which is involved in the biogenesis of the 18S rRNA                                                           | -2.0 |
| YOL092W |         | Hypothetical protein                                                                                                                                             | -2.0 |
| YNL299W | TRF5    | Poly (A) polymerase involved in nuclear RNA quality control based on: homology with Trf4p, genetic interactions with TRF4 mutants, physical                      | -2.0 |
| YDR120C | TRM1    | tRNA methyltransferase, localizes to both the nucleus and mitochondrion to produce the modified base N2,N2-dimethylguanosine in tRNAs in both                    | -2.0 |

|           |        |                                                                                                                                                                  |      |
|-----------|--------|------------------------------------------------------------------------------------------------------------------------------------------------------------------|------|
| YIL127C   |        | Putative protein of unknown function; green fluorescent protein (GFP)-fusion protein localizes to the nucleolus                                                  | -2.0 |
| YPL211W   | NIP7   | Nucleolar protein required for 60S ribosome subunit biogenesis, constituent of 66S pre-ribosomal particles; physically interacts with Nop8p and the exosome      | -2.0 |
| YCR057C   | PWP2   | Conserved 90S pre-ribosomal component essential for proper endonucleolytic cleavage of the 35 S rRNA precursor at A0, A1, and A2 sites; contains eight           | -2.0 |
| YDR091C   | RLI1   | Essential iron-sulfur protein required for ribosome biogenesis and translation initiation; facilitates binding of a multifactor complex (MFC) of translation     | -2.0 |
| YOL149W   | DCP1   | Subunit of the Dcp1p-Dcp2p decapping enzyme complex, which removes the 5' cap structure from mRNAs prior to their degradation; enhances the activity of          | -2.0 |
| YBL052C   | SAS3   | Histone acetyltransferase catalytic subunit of NuA3 complex that acetylates histone H3, involved in transcriptional silencing; homolog of the mammalian          | -2.0 |
| YOR337W   | TEA1   | Ty1 enhancer activator required for full levels of Ty enhancer-mediated transcription; C6 zinc cluster DNA-binding protein                                       | -2.0 |
| YJL200C   | ACO2   | Putative mitochondrial aconitase isozyme; similarity to Aco1p, an aconitase required for the TCA cycle; expression induced during growth on glucose, by          | -2.0 |
| YIL020C   | HIS6   | Phosphoribosyl-5-amino-1-phosphoribosyl-4-imidazolecarboxiamide isomerase, catalyzes the fourth step in histidine biosynthesis; mutations cause                  | -2.0 |
| YPL269W   | KAR9   | Karyogamy protein required for correct positioning of the mitotic spindle and for orienting cytoplasmic microtubules, localizes at the shmoo tip in mating cells | -2.0 |
| YER148W   | SPT15  | TATA-binding protein, general transcription factor that interacts with other factors to form the preinitiation complex at promoters, essential for viability     | -2.0 |
| YPL058C   | PDR12  | Plasma membrane weak-acid-inducible ATP-binding cassette (ABC) transporter, required for weak organic acid resistance, strongly induced by                       | -2.0 |
| YFL034C-A | RPL22B | Protein component of the large (60S) ribosomal subunit, has similarity to Rpl22Ap and to rat L22 ribosomal protein                                               | -2.0 |
| YGL012W   | ERG4   | C-24(28) sterol reductase, catalyzes the final step in ergosterol biosynthesis; mutants are viable, but lack ergosterol                                          | -2.0 |
| YLR348C   | DIC1   | Mitochondrial dicarboxylate carrier, integral membrane protein, catalyzes a dicarboxylate-phosphate exchange across the inner mitochondrial membrane,            | -2.0 |
| YMR290C   | HAS1   | ATP-dependent RNA helicase; localizes to both the nuclear periphery and nucleolus; highly enriched in nuclear pore complex fractions; constituent of 66S         | -2.0 |
| YDR113C   | PDS1   | Securin that inhibits anaphase by binding separin Esp1p, also blocks cyclin destruction and mitotic exit, essential for cell cycle arrest in mitosis in the      | -2.0 |
| YOR011W   | AUS1   | Transporter of the ATP-binding cassette family, involved in uptake of sterols and anaerobic growth                                                               | -2.0 |
| YJR109C   | CPA2   | Large subunit of carbamoyl phosphate synthetase, which catalyzes a step in the synthesis of citrulline, an arginine precursor                                    | -2.0 |
| YNL216W   | RAP1   | DNA-binding protein involved in either activation or repression of transcription, depending on binding site context; also binds telomere sequences and plays a   | -2.0 |
| YDR449C   | UTP6   | Nucleolar protein, component of the small subunit (SSU) processome containing the U3 snoRNA that is involved in processing of pre-18S rRNA                       | -2.0 |
| YHR196W   | UTP9   | Nucleolar protein, component of the small subunit (SSU) processome containing the U3 snoRNA that is involved in processing of pre-18S rRNA                       | -2.0 |
| YCL063W   | VAC17  | Protein involved in vacuole inheritance; acts as a vacuole-specific receptor for myosin Myo2p                                                                    | -2.0 |
| YLR008C   | PAM18  | Constituent of the mitochondrial import motor associated with the presequence translocase, along with Ssc1p, Tim44p, Mge1p, and Pam16p; stimulates the           | -2.1 |
| YLR186W   | EMG1   | Protein required for the maturation of the 18S rRNA and for 40S ribosome production; associated with spindle/microtubules; nuclear localization depends          | -2.1 |
| YML116W   | ATR1   | Multidrug efflux pump of the major facilitator superfamily, required for resistance to aminotriazole and 4-nitroquinoline-N-oxide                                | -2.1 |
| YFL026W   | STE2   | Receptor for alpha-factor pheromone; seven transmembrane-domain GPCR that interacts with both pheromone and a heterotrimeric G protein to initiate the           | -2.1 |
| YNL191W   |        | Hypothetical protein                                                                                                                                             | -2.1 |

|         |        |                                                                                                                                                                 |      |
|---------|--------|-----------------------------------------------------------------------------------------------------------------------------------------------------------------|------|
| YKL191W | DPH2   | Protein required, along with Dph1p, Kti11p, Jjj3p, and Dph5p, for synthesis of diphthamide, which is a modified histidine residue of translation elongation     | -2.1 |
| YML087C |        | Hypothetical protein                                                                                                                                            | -2.1 |
| YBL009W |        | haspin                                                                                                                                                          | -2.1 |
| YLR413W |        | Putative protein of unknown function; YLR413W is not an essential gene                                                                                          | -2.1 |
| YNL180C | RHO5   | Non-essential small GTPase of the Rho/Rac subfamily of Ras-like proteins, likely involved in protein kinase C (Pkc1p)-dependent signal transduction             | -2.1 |
| YDL060W | TSR1   | Protein required for processing of 20S pre-rRNA in the cytoplasm, associates with pre-40S ribosomal particles                                                   | -2.1 |
| YGR065C | VHT1   | High-affinity plasma membrane H <sup>+</sup> -biotin (vitamin H) symporter; mutation results in fatty acid auxotrophy; 12 transmembrane domain containing major | -2.1 |
| YER156C |        | Hypothetical protein                                                                                                                                            | -2.1 |
| YMR003W |        | Protein of unknown function; green fluorescent protein (GFP)-fusion protein localizes to the mitochondria; YMR003W is not an essential gene                     | -2.1 |
| YAL025C | MAK16  | Essential nuclear protein, constituent of 66S pre-ribosomal particles; required for normal concentration of free 60S ribosomal subunits; required for           | -2.1 |
| YLR019W | PSR2   | Functionally redundant Psr1p homolog, a plasma membrane phosphatase involved in the general stress response; required with Psr1p and Whi2p for full             | -2.1 |
| YBR145W | ADH5   | Alcohol dehydrogenase isoenzyme V; involved in ethanol production                                                                                               | -2.1 |
| YLR304C | ACO1   | Aconitase, required for the tricarboxylic acid (TCA) cycle and also independently required for mitochondrial genome maintenance; component of                   | -2.1 |
| YJR112W | NNF1   | Essential component of the MIND kinetochore complex (Mtw1p Including Nnf1p, Nsl1p-Dsn1p) which joins kinetochore subunits contacting DNA to those               | -2.1 |
| YMR209C |        | Hypothetical protein                                                                                                                                            | -2.1 |
| YCL036W | GFD2   | Protein of unknown function, identified as a high-copy suppressor of a dbp5 mutation                                                                            | -2.1 |
| YKR058W | GLG1   | Self-glucosylating initiator of glycogen synthesis, also glucosylates n-dodecyl-beta-D-maltoside; similar to mammalian glycogenin                               | -2.1 |
| YJR124C |        | Hypothetical protein                                                                                                                                            | -2.1 |
| YHR049W | FSH1   | Serine hydrolase that localizes to both the nucleus and cytoplasm; sequence is similar to Fsh2p and Fsh3p                                                       | -2.1 |
| YOL115W | PAP2   | Catalytic subunit of TRAMP (Trf4/Pap2p-Mtr4p-Air1p/2p), a nuclear poly (A) polymerase complex involved in RNA quality control; catalyzes polyadenylation        | -2.1 |
| YNL151C | RPC31  | RNA polymerase III subunit C31; contains HMG-like C-terminal domain                                                                                             | -2.1 |
| YPR009W | SUT2   | Putative transcription factor; multicopy suppressor of mutations that cause low activity of the cAMP/protein kinase A pathway; highly similar to Sut1p          | -2.1 |
| YDL205C | HEM3   | Phorphobilinogen deaminase, catalyzes the conversion of 4-porphobilinogen to hydroxymethylbilane, the third step in the heme biosynthetic pathway; localizes    | -2.1 |
| YDL170W | UGA3   | Transcriptional activator necessary for gamma-aminobutyrate (GABA)-dependent induction of GABA genes (such as UGA1, UGA2, UGA4); zinc-                          | -2.1 |
| YMR006C | PLB2   | Phospholipase B (lysophospholipase) involved in phospholipid metabolism; displays transacylase activity in vitro; overproduction confers resistance to          | -2.1 |
| YNL301C | RPL18B | Protein component of the large (60S) ribosomal subunit, identical to Rpl18Ap and has similarity to rat L18 ribosomal protein                                    | -2.2 |
| YOR264W | DSE3   | Daughter cell-specific protein, may help establish daughter fate                                                                                                | -2.2 |
| YBR028C |        | Hypothetical protein                                                                                                                                            | -2.2 |

|           |        |                                                                                                                                                                  |      |
|-----------|--------|------------------------------------------------------------------------------------------------------------------------------------------------------------------|------|
| YOL093W   | TRM10  | tRNA methyltransferase, methylates the N-1 position of guanosine in tRNAs                                                                                        | -2.2 |
| YLR437C   |        | Hypothetical protein                                                                                                                                             | -2.2 |
| YIL074C   | SER33  | 3-phosphoglycerate dehydrogenase, catalyzes the first step in serine and glycine biosynthesis; isozyme of Ser3p                                                  | -2.2 |
| YGR125W   |        | Putative protein of unknown function; deletion mutant has decreased rapamycin resistance but normal wormannin resistance; green fluorescent                      | -2.2 |
| YLR056W   | ERG3   | C-5 sterol desaturase, catalyzes the introduction of a C-5(6) double bond into episterol, a precursor in ergosterol biosynthesis; mutants are viable, but cannot | -2.2 |
| YER069W   | ARG5,6 | Protein that is processed in the mitochondrion to yield acetylglutamate kinase and N-acetyl-gamma-glutamyl-phosphate reductase, which catalyze the 2nd           | -2.2 |
| YJL077C   | ICS3   | Protein of unknown function                                                                                                                                      | -2.2 |
| YIL162W   | SUC2   | Invertase, sucrose hydrolyzing enzyme; a secreted, glycosylated form is regulated by glucose repression, and an intracellular, nonglycosylated enzyme            | -2.2 |
| YBR233W-A | DAD3   | Essential subunit of the Dam1 complex (aka DASH complex), couples kinetochores to the force produced by MT depolymerization thereby aiding in                    | -2.2 |
| YPR157W   |        | Hypothetical protein                                                                                                                                             | -2.2 |
| YGL201C   | MCM6   | Protein involved in DNA replication; component of the Mcm2-7 hexameric complex that binds chromatin as a part of the pre-replicative complex                     | -2.2 |
| YBR213W   | MET8   | Bifunctional dehydrogenase and ferredoxin, involved in the biosynthesis of siroheme; also involved in the expression of PAPS reductase and sulfite               | -2.2 |
| YOR302W   |        | CPA1 uORF , Arginine attenuator peptide, regulates translation of the CPA1 mRNA                                                                                  | -2.2 |
| YCL055W   | KAR4   | Transcription factor required for induction of KAR3 and CIK1 during mating, also required during meiosis; exists in two forms, a slower-migrating form more      | -2.2 |
| YOR390W   |        | Hypothetical protein /// Hypothetical protein                                                                                                                    | -2.3 |
| YDR078C   | SHU2   | Protein of unassigned function involved in mutation suppression, important for error-free repair of spontaneous and induced DNA lesions to protect the           | -2.3 |
| YFR055W   |        | Putative cystathionine beta-lyase; involved in copper ion homeostasis and sulfur metabolism; null mutant displays increased levels of spontaneous Rad52          | -2.3 |
| YGR177C   | ATF2   | Alcohol acetyltransferase, may play a role in steroid detoxification; forms volatile esters during fermentation, which is important in brewing                   | -2.3 |
| YOR073W   | SGO1   | Component of the spindle checkpoint, involved in sensing lack of tension on mitotic chromosomes; protects centromeric Rec8p at meiosis I; required for           | -2.3 |
| YJL134W   | LCB3   | Long-chain base-1-phosphate phosphatase, regulates ceramide and long-chain base phosphates levels, involved in incorporation of exogenous long                   | -2.3 |
| YJL051W   |        | Bud tip localized protein of unknown function; mRNA is targeted to the bud by a She2p dependent transport system; mRNA is cell cycle regulated via Fkh2p,        | -2.3 |
| YMR266W   |        | Membrane protein of unknown function; overexpression suppresses NaCl sensitivity of sro7 mutant                                                                  | -2.3 |
| YIL132C   | CSM2   | Protein required for accurate chromosome segregation during meiosis                                                                                              | -2.3 |
| YOR004W   | UTP23  | Essential nucleolar protein that is a component of the SSU (small subunit) processome involved in 40S ribosomal subunit biogenesis; has homology to              | -2.3 |
| YOR375C   | GDH1   | NADP(+)-dependent glutamate dehydrogenase, synthesizes glutamate from ammonia and alpha-ketoglutarate; rate of alpha-ketoglutarate utilization differs           | -2.3 |
| YGL117W   |        | Hypothetical protein                                                                                                                                             | -2.3 |
| YMR030W-A |        | Putative protein of unknown function                                                                                                                             | -2.3 |
| YOR342C   |        | Hypothetical protein                                                                                                                                             | -2.3 |

|         |       |                                                                                                                                                                 |      |
|---------|-------|-----------------------------------------------------------------------------------------------------------------------------------------------------------------|------|
| YDR461W | MFA1  | Mating pheromone a-factor, made by a cells; interacts with alpha cells to induce cell cycle arrest and other responses leading to mating; biogenesis            | -2.3 |
| YMR189W | GCV2  | P subunit of the mitochondrial glycine decarboxylase complex, required for the catabolism of glycine to 5,10-methylene-THF; expression is regulated by levels   | -2.3 |
| YER070W | RNR1  | Ribonucleotide-diphosphate reductase (RNR), large subunit; the RNR complex catalyzes the rate-limiting step in dNTP synthesis and is regulated by DNA           | -2.3 |
| YGL032C | AGA2  | Adhesion subunit of a-agglutinin of a-cells, C-terminal sequence acts as a ligand for alpha-agglutinin (Sag1p) during agglutination, modified with O-linked     | -2.3 |
| YMR015C | ERG5  | C-22 sterol desaturase, a cytochrome P450 enzyme that catalyzes the formation of the C-22(23) double bond in the sterol side chain in ergosterol                | -2.3 |
| YPL241C | CIN2  | Tubulin folding factor C (putative) involved in beta-tubulin (Tub2p) folding; isolated as mutant with increased chromosome loss and sensitivity to benomyl      | -2.4 |
| YBL016W | FUS3  | Mitogen-activated protein kinase involved in mating pheromone response; activated by phosphorylation by Ste7p; provides specificity during the mating           | -2.4 |
| YLR073C |       | Protein of unknown function; green fluorescent protein (GFP)-fusion protein localizes to endosomes; YLR073C is not an essential gene                            | -2.4 |
| YLL012W | YEH1  | Steryl ester hydrolase, one of three gene products (Yeh1p, Yeh2p, Tgl1p) responsible for steryl ester hydrolase activity and involved in sterol                 | -2.4 |
| YEL032W | MCM3  | Protein involved in DNA replication; component of the Mcm2-7 hexameric complex that binds chromatin as a part of the pre-replicative complex                    | -2.4 |
| YDR207C | UME6  | Key transcriptional regulator of early meiotic genes, binds URS1 upstream regulatory sequence, couples metabolic responses to nutritional cues with             | -2.4 |
| YGL101W |       | Hypothetical protein                                                                                                                                            | -2.4 |
| YDR528W | HLR1  | Protein involved in regulation of cell wall composition and integrity and response to osmotic stress; overproduction suppresses a lysis sensitive PKC           | -2.4 |
| YKL106W | AAT1  | Mitochondrial aspartate aminotransferase, catalyzes the conversion of oxaloacetate to aspartate in aspartate and asparagine biosynthesis                        | -2.4 |
| YIL121W | QDR2  | Multidrug transporter required for resistance to quinidine, barban, cisplatin, and bleomycin; member of the major facilitator superfamily of transporters       | -2.4 |
| YER052C | HOM3  | Aspartate kinase (L-aspartate 4-P-transferase); cytoplasmic enzyme that catalyzes the first step in the common pathway for methionine and threonine             | -2.4 |
| YKR092C | SRP40 | Nucleolar, serine-rich protein with a role in preribosome assembly or transport; may function as a chaperone of small nucleolar ribonucleoprotein particles     | -2.4 |
| YDR089W |       | Hypothetical protein                                                                                                                                            | -2.4 |
| YKL120W | OAC1  | Mitochondrial inner membrane transporter, transports oxaloacetate, sulfate, and thiosulfate; member of the mitochondrial carrier family                         | -2.4 |
| YLL055W |       | Putative protein of unknown function with similarity to transporters; green fluorescent protein (GFP)-fusion protein localizes to the endoplasmic reticulum;    | -2.4 |
| YOL064C | MET22 | Bisphosphate-3'-nucleotidase, involved in salt tolerance and methionine biogenesis; dephosphorylates 3'-phosphoadenosine-5'-phosphate and 3'-                   | -2.4 |
| YGR221C | TOS2  | Protein involved in localization of Cdc24p to the site of bud growth; may act as a membrane anchor; localizes to the bud neck and bud tip; potentially          | -2.5 |
| YOL012C | HTZ1  | Histone variant H2AZ, exchanged for histone H2A in nucleosomes by the SWR1 complex; involved in transcriptional regulation through prevention of the            | -2.5 |
| YDL167C | NRP1  | Protein of unknown function, rich in asparagine residues                                                                                                        | -2.5 |
| YJR070C | LIA1  | Deoxyhypusine hydroxylase, a HEAT-repeat containing metalloenzyme that catalyses hypusine formation; binds to and is required for the modification of           | -2.5 |
| YOR317W | FAA1  | Long chain fatty acyl-CoA synthetase with a preference for C12:0-C16:0 fatty acids; involved in the activation of imported fatty acids; localized to both lipid | -2.5 |
| YGL125W | MET13 | Isozyme of methylenetetrahydrofolate reductase, catalyzes the reduction of 5,10-methylenetetrahydrofolate to 5-methyltetrahydrofolate in the methionine         | -2.5 |
| YPL279C |       | Hypothetical protein                                                                                                                                            | -2.5 |



|           |       |                                                                                                                                                                    |      |
|-----------|-------|--------------------------------------------------------------------------------------------------------------------------------------------------------------------|------|
| YNL112W   | DBP2  | Essential ATP-dependent RNA helicase of the DEAD-box protein family, involved in nonsense-mediated mRNA decay and rRNA processing                                  | -2.5 |
| YPL158C   |       | Hypothetical protein                                                                                                                                               | -2.5 |
| YGR245C   | SDA1  | Highly conserved nuclear protein required for actin cytoskeleton organization and passage through Start, plays a critical role in G1 events, binds Nap1p, also     | -2.5 |
| YNL111C   | CYB5  | Cytochrome b5, involved in the sterol and lipid biosynthesis pathways; required for sterol C5-6 and fatty acid desaturation                                        | -2.5 |
| YOL140W   | ARG8  | Acetylmethionine aminotransferase, catalyzes the fourth step in the biosynthesis of the arginine precursor ornithine                                               | -2.6 |
| YHR128W   | FUR1  | Uracil phosphoribosyltransferase, synthesizes UMP from uracil; involved in the pyrimidine salvage pathway                                                          | -2.6 |
| YNL141W   | AAH1  | Adenine deaminase (adenine aminohydrolase), involved in purine salvage and nitrogen catabolism                                                                     | -2.6 |
| YPL250C   | ICY2  | Protein of unknown function; potential Cdc28p substrate                                                                                                            | -2.6 |
| YGR109W-B |       | Retrotransposon TYA Gag and TYB Pol genes; transcribed/translated as one unit; polyprotein is processed to make a nucleocapsid-like protein (Gag),                 | -2.6 |
| YPL252C   | YAH1  | Ferredoxin of the mitochondrial matrix required for formation of cellular iron-sulfur proteins; involved in heme A biosynthesis; homologous to human               | -2.6 |
| YIL131C   | FKH1  | Transcription factor of the forkhead family that regulates the cell cycle and pseudohyphal growth; also involved in chromatin silencing at HML and HMR             | -2.6 |
| YML091C   | RPM2  | Protein component of mitochondrial RNase P, along with the mitochondrially-encoded RNA subunit RPM1; RNase P removes 5' extensions from tRNA                       | -2.6 |
| YEL038W   | UTR4  | Protein of unknown function, found in both the cytoplasm and nucleus                                                                                               | -2.6 |
| YJL122W   | ALB1  | Shuttling pre-60S factor; involved in the biogenesis of ribosomal large subunit; interacts directly with Arx1p; responsible for Tif6p recycling defects in absence | -2.7 |
| YIL037C   | PRM2  | Pheromone-regulated protein, predicted to have 4 transmembrane segments and a coiled coil domain; regulated by Ste12p                                              | -2.7 |
| YML018C   |       | Putative protein of unknown function; green fluorescent protein (GFP)-fusion protein localizes to the membrane of the vacuole; YML018C is not an essential         | -2.7 |
| YBL028C   |       | Hypothetical protein                                                                                                                                               | -2.7 |
| YIL082W-A |       | Retrotransposon TYA Gag and TYB Pol genes; transcribed/translated as one unit; polyprotein is processed to make a nucleocapsid-like protein (Gag),                 | -2.7 |
| YER124C   | DSE1  | Daughter cell-specific protein, may participate in pathways regulating cell wall metabolism; deletion affects cell separation after division and sensitivity to    | -2.7 |
| YJR147W   | HMS2  | Protein with similarity to heat shock transcription factors; overexpression suppresses the pseudohyphal filamentation defect of a diploid mep1 mep2                | -2.7 |
| YGR280C   | PXR1  | Essential protein involved in rRNA and snoRNA maturation; competes with TLC1 RNA for binding to Est2p, suggesting a role in regulation of telomerase;              | -2.7 |
| YEL040W   | UTR2  | Putative glycosidase, glycosylphosphatidylinositol (GPI)-anchored protein localized to the bud neck; has a role in cell wall maintenance                           | -2.7 |
| YNL078W   | NIS1  | Protein localized in the bud neck at G2/M phase; physically interacts with septins; possibly involved in a mitotic signaling network                               | -2.7 |
| YGL162W   | SUT1  | Transcription factor of the Zn[II]2Cys6 family involved in sterol uptake; involved in induction of hypoxic gene expression                                         | -2.7 |
| YDL171C   | GLT1  | NAD(+)-dependent glutamate synthase (GOGAT), synthesizes glutamate from glutamine and alpha-ketoglutarate; with Gln1p, forms the secondary pathway                 | -2.8 |
| YKL001C   | MET14 | Adenylylsulfate kinase, required for sulfate assimilation and involved in methionine metabolism                                                                    | -2.8 |
| YDR384C   | ATO3  | Plasma membrane protein, regulation pattern suggests a possible role in export of ammonia from the cell; member of the TC 9.B.33 YaaH family of                    | -2.8 |
| YBR291C   | CTP1  | Mitochondrial inner membrane citrate transporter, member of the mitochondrial carrier family                                                                       | -2.8 |

|           |       |                                                                                                                                                                       |      |
|-----------|-------|-----------------------------------------------------------------------------------------------------------------------------------------------------------------------|------|
| YNR028W   | CPR8  | Peptidyl-prolyl cis-trans isomerase (cyclophilin), catalyzes the cis-trans isomerization of peptide bonds N-terminal to proline residues; similarity to               | -2.8 |
| YBR157C   | ICS2  | Protein of unknown function; null mutation does not confer any obvious defects in growth, spore germination, viability, or carbohydrate utilization                   | -2.8 |
| YMR032W   | HOF1  | Bud neck-localized, SH3 domain-containing protein required for cytokinesis; regulates actomyosin ring dynamics and septin localization; interacts with the            | -2.8 |
| YDR075W   | PPH3  | Catalytic subunit of an evolutionarily conserved protein phosphatase complex containing Psy2p and the regulatory subunit Psy4p; required for cisplatin                | -2.8 |
| YHR153C   | SPO16 | Protein of unknown function, required for spore formation                                                                                                             | -2.8 |
| YMR243C   | ZRC1  | Vacuolar membrane zinc transporter, transports zinc from the cytosol into the vacuole for storage; also has a role in resistance to zinc shock resulting from a       | -2.8 |
| YGR108W   | CLB1  | B-type cyclin involved in cell cycle progression; activates Cdc28p to promote the transition from G2 to M phase; accumulates during G2 and M, then                    | -2.8 |
| YCL027W   | FUS1  | Membrane protein localized to the shmoo tip, required for cell fusion; expression regulated by mating pheromone; proposed to coordinate signaling,                    | -2.8 |
| YEL063C   | CAN1  | Plasma membrane arginine permease, requires phosphatidyl ethanolamine (PE) for localization, exclusively associated with lipid rafts; mutation confers                | -2.8 |
| YMR058W   | FET3  | Ferro-O <sub>2</sub> -oxidoreductase required for high-affinity iron uptake and involved in mediating resistance to copper ion toxicity, belongs to class of integral | -2.9 |
| YPR145W   | ASN1  | Asparagine synthetase, isozyme of Asn2p; catalyzes the synthesis of L-asparagine from L-aspartate in the asparagine biosynthetic pathway                              | -2.9 |
| YHL026C   |       | Putative protein of unknown function; YHL026C is not an essential gene; in 2005 the start site was moved 141 nt upstream (see Locus History)                          | -2.9 |
| YKL201C   | MNN4  | Putative positive regulator of mannosylphosphate transferase (Mnn6p), involved in mannosylphosphorylation of N-linked oligosaccharides; expression                    | -3.0 |
| YOR095C   | RK11  | Ribose-5-phosphate ketol-isomerase, catalyzes the interconversion of ribose 5-phosphate and ribulose 5-phosphate in the pentose phosphate pathway;                    | -3.0 |
| YPL144W   |       | Hypothetical protein                                                                                                                                                  | -3.0 |
| YEL072W   | RMD6  | Protein required for sporulation                                                                                                                                      | -3.0 |
| YDR281C   | PHM6  | Protein of unknown function, expression is regulated by phosphate levels                                                                                              | -3.0 |
| YBR085W   | AAC3  | Mitochondrial inner membrane ADP/ATP translocator, exchanges cytosolic ADP for mitochondrially synthesized ATP; expressed under anaerobic                             | -3.0 |
| YBR184W   |       | Putative protein of unknown function; YBR184W is not an essential gene                                                                                                | -3.0 |
| YBR202W   | CDC47 | Component of the hexameric MCM complex, which is important for priming origins of DNA replication in G1 and becomes an active ATP-dependent                           | -3.0 |
| YLR452C   | SST2  | GTPase-activating protein for Gpa1p, regulates desensitization to alpha factor pheromone; also required to prevent receptor-independent signaling of the              | -3.1 |
| YJL047C-A |       | Putative protein of unknown function                                                                                                                                  | -3.1 |
| YDL198C   | GGC1  | Mitochondrial GTP/GDP transporter, essential for mitochondrial genome maintenance; has a role in mitochondrial iron transport; member of the                          | -3.1 |
| YBL044W   |       | Hypothetical protein                                                                                                                                                  | -3.1 |
| YOL154W   | ZPS1  | Putative GPI-anchored protein; transcription is induced under low-zinc conditions, as mediated by the Zap1p transcription factor, and at alkaline pH                  | -3.1 |
| YIL164C   | NIT1  | Nitrilase, member of the widely found nitrilase branch (EC:3.5.5.1) of the nitrilase superfamily                                                                      | -3.2 |
| YKL043W   | PHD1  | Transcriptional activator that enhances pseudohyphal growth; regulates expression of FLO11, an adhesin required for pseudohyphal filament formation;                  | -3.2 |
| YIL158W   |       | Putative protein of unknown function; green fluorescent protein (GFP)-fusion protein localizes to the vacuole                                                         | -3.2 |

|           |       |                                                                                                                                                                      |      |
|-----------|-------|----------------------------------------------------------------------------------------------------------------------------------------------------------------------|------|
| YJR152W   | DAL5  | Allantoin permease; ureidosuccinate permease; expression is constitutive but sensitive to nitrogen catabolite repression                                             | -3.2 |
| YGR121C   | MEP1  | Ammonium permease; belongs to a ubiquitous family of cytoplasmic membrane proteins that transport only ammonium (NH <sub>4</sub> <sup>+</sup> ); expression is under | -3.2 |
| YNL327W   | EGT2  | Glycosylphosphatidylinositol (GPI)-anchored cell wall endoglucanase required for proper cell separation after cytokinesis, expression is activated by Swi5p          | -3.3 |
| YCL024W   | KCC4  | Protein kinase of the bud neck involved in the septin checkpoint, associates with septin proteins, negatively regulates Swe1p by phosphorylation, shows              | -3.3 |
| YFL021W   | GAT1  | Transcriptional activator of genes involved in nitrogen catabolite repression, member of the GATA family of DNA binding proteins; activity and localization          | -3.3 |
| YBR265W   | TSC10 | 3-ketosphinganine reductase, catalyzes the second step in phytosphingosine synthesis, essential for growth in the absence of exogenous                               | -3.3 |
| YOR101W   | RAS1  | GTPase involved in G-protein signaling in the adenylate cyclase activating pathway, plays a role in cell proliferation; localized to the plasma membrane;            | -3.4 |
| YBR218C   | PYC2  | Pyruvate carboxylase isoform, cytoplasmic enzyme that converts pyruvate to oxaloacetate; highly similar to isoform Pyc1p but differentially regulated;               | -3.4 |
| YIR017C   | MET28 | Transcriptional activator in the Cbf1p-Met4p-Met28p complex, participates in the regulation of sulfur metabolism                                                     | -3.4 |
| YML052W   | SUR7  | Putative integral membrane protein; component of eisosomes; associated with endocytosis, along with Pil1p and Lsp1p; sporulation and plasma membrane                 | -3.5 |
| YJL078C   | PRY3  | Protein of unknown function, has similarity to Pry1p and Pry2p and to the plant PR-1 class of pathogen related proteins                                              | -3.6 |
| YGR234W   | YHB1  | Nitric oxide oxidoreductase, flavohemoglobin involved in nitric oxide detoxification; plays a role in the oxidative and nitrosative stress responses                 | -3.6 |
| YHR092C   | HXT4  | High-affinity glucose transporter of the major facilitator superfamily, expression is induced by low levels of glucose and repressed by high levels of glucose       | -3.6 |
| YFR030W   | MET10 | Subunit alpha of assimilatory sulfite reductase, which is responsible for the conversion of sulfite into sulfide                                                     | -3.6 |
| YJR010W   | MET3  | ATP sulfurylase, catalyzes the primary step of intracellular sulfate activation, essential for assimilatory reduction of sulfate to sulfide, involved in methionine  | -3.6 |
| YJL088W   | ARG3  | Ornithine carbamoyltransferase (carbamoylphosphate:L-ornithine carbamoyltransferase), catalyzes the sixth step in the biosynthesis of the                            | -3.6 |
| YDL059C   | RAD59 | Protein involved in the repair of double-strand breaks in DNA during vegetative growth via recombination and single-strand annealing; anneals complementary          | -3.6 |
| YGR109W-A |       | Retrotransposon TYA Gag gene co-transcribed with TYB Pol; translated as TYA or TYA-TYB polyprotein; Gag is a nucleocapsid protein that is the                        | -3.6 |
| YJL079C   | PRY1  | Protein of unknown function, has similarity to Pry2p and Pry3p and to the plant PR-1 class of pathogen related proteins                                              | -3.7 |
| YNR067C   | DSE4  | Daughter cell-specific secreted protein with similarity to glucanases, degrades cell wall from the daughter side causing daughter to separate from mother            | -3.7 |
| YER056C   | FCY2  | Purine-cytosine permease, mediates purine (adenine, guanine, and hypoxanthine) and cytosine accumulation                                                             | -3.7 |
| YBR092C   | PHO3  | Constitutively expressed acid phosphatase similar to Pho5p; brought to the cell surface by transport vesicles; hydrolyzes thiamin phosphates in the periplasmic      | -3.7 |
| YBR147W   |       | Putative protein of unknown function; YBR147W is not an essential gene; resistant to fluconazole                                                                     | -3.7 |
| YBR158W   | AMN1  | Protein required for daughter cell separation, multiple mitotic checkpoints, and chromosome stability; contains 12 degenerate leucine-rich repeat motifs;            | -3.7 |
| YIL165C   |       | Hypothetical protein                                                                                                                                                 | -3.7 |
| YPL092W   | SSU1  | Plasma membrane sulfite pump involved in sulfite metabolism and required for efficient sulfite efflux; major facilitator superfamily protein                         | -3.7 |
| YMR215W   | GAS3  | Putative 1,3-beta-glucanosyltransferase, has similarity to Gas1p; localizes to the cell wall                                                                         | -3.8 |
| YNR009W   | NRM1  | Transcriptional co-repressor of MBF (MCB binding factor)-regulated gene expression; Nrm1p associates stably with promoters via MBF to repress                        | -3.8 |

|           |       |                                                                                                                                                               |      |
|-----------|-------|---------------------------------------------------------------------------------------------------------------------------------------------------------------|------|
| YKL109W   | HAP4  | Subunit of the heme-activated, glucose-repressed Hap2p/3p/4p/5p CCAAT-binding complex, a transcriptional activator and global regulator of respiratory        | -3.8 |
| YLR364W   |       | Putative protein of unknown function; green fluorescent protein (GFP)-fusion protein localizes to the cytoplasm; YLR364W is not an essential gene             | -3.8 |
| YGL028C   | SCW11 | Cell wall protein with similarity to glucanases; may play a role in conjugation during mating based on its regulation by Ste12p                               | -3.8 |
| YER145C   | FTR1  | High affinity iron permease involved in the transport of iron across the plasma membrane; forms complex with Fet3p; expression is regulated by iron           | -3.9 |
| YGL035C   | MIG1  | Transcription factor involved in glucose repression; C2H2 zinc finger protein similar to mammalian Egr and Wilms tumor proteins                               | -3.9 |
| YPL265W   | DIP5  | Dicarboxylic amino acid permease, mediates high-affinity and high-capacity transport of L-glutamate and L-aspartate; also a transporter for Gln, Asn, Ser,    | -3.9 |
| YLR049C   |       | Hypothetical protein                                                                                                                                          | -3.9 |
| YPR167C   | MET16 | 3'-phosphoadenylylsulfate reductase, reduces 3'-phosphoadenylyl sulfate to adenosine-3',5'-bisphosphate and free sulfite using reduced thioredoxin as         | -3.9 |
| YIL011W   | TIR3  | Cell wall mannoprotein of the Srp1p/Tip1p family of serine-alanine-rich proteins; expressed under anaerobic conditions and required for anaerobic             | -4.1 |
| YGR109C   | CLB6  | B-type cyclin involved in DNA replication during S phase; activates Cdc28p to promote initiation of DNA synthesis; functions in formation of mitotic spindles | -4.2 |
| YHL036W   | MUP3  | Low affinity methionine permease, similar to Mup1p                                                                                                            | -4.3 |
| YOR108W   | LEU9  | Alpha-isopropylmalate synthase II (2-isopropylmalate synthase), catalyzes the first step in the leucine biosynthesis pathway; the minor isozyme, responsible  | -4.3 |
| YCR089W   | FIG2  | Cell wall adhesin, expressed specifically during mating; may be involved in maintenance of cell wall integrity during mating                                  | -4.3 |
| YJR137C   | ECM17 | Sulfite reductase beta subunit, involved in amino acid biosynthesis, transcription repressed by methionine                                                    | -4.3 |
| YIR031C   | DAL7  | Malate synthase, role in allantoin degradation unknown; expression sensitive to nitrogen catabolite repression and induced by allophanate, an intermediate in | -4.4 |
| YNL065W   | AQR1  | Plasma membrane transporter of the major facilitator superfamily that confers resistance to short-chain monocarboxylic acids and quinidine                    | -4.4 |
| YKL029C   | MAE1  | Mitochondrial malic enzyme, catalyzes the oxidative decarboxylation of malate to pyruvate, which is a key intermediate in sugar metabolism and a precursor    | -4.4 |
| YKL068W-A |       | Putative protein of unknown function; identified by homology to <i>Ashbya gossypii</i>                                                                        | -4.5 |
| YPR138C   | MEP3  | Ammonium permease of high capacity and low affinity; belongs to a ubiquitous family of cytoplasmic membrane proteins that transport only ammonium             | -4.7 |
| YDR253C   | MET32 | Zinc-finger DNA-binding protein, involved in regulating expression of the methionine biosynthetic genes, similar to Met31p                                    | -4.9 |
| YKR069W   | MET1  | S-adenosyl-L-methionine uroporphyrinogen III transmethylase, involved in sulfate assimilation, methionine metabolism, and siroheme biosynthesis               | -5.0 |
| YJR004C   | SAG1  | Alpha-agglutinin of alpha-cells, binds to Aga1p during agglutination, N-terminal half is homologous to the immunoglobulin superfamily and contains binding    | -5.0 |
| YJL212C   | OPT1  | Plasma membrane transporter that transports tetra- and pentapeptides and glutathione; member of the OPT family                                                | -5.0 |
| YHR214C-E |       | Hypothetical protein /// Identified by gene-trapping, microarray-based expression analysis, and genome-wide homology searching                                | -5.0 |
| YLR130C   | ZRT2  | Low-affinity zinc transporter of the plasma membrane; transcription is induced under low-zinc conditions by the Zap1p transcription factor                    | -5.1 |
| YHR143W   | DSE2  | Daughter cell-specific secreted protein with similarity to glucanases, degrades cell wall from the daughter side causing daughter to separate from mother;    | -5.1 |
| YIR032C   | DAL3  | Ureidoglycolate hydrolase, converts ureidoglycolate to glyoxylate and urea in the third step of allantoin degradation; expression sensitive to nitrogen       | -5.3 |
| YNL277W   | MET2  | L-homoserine-O-acetyltransferase, catalyzes the conversion of homoserine to O-acetyl homoserine which is the first step of the methionine biosynthetic        | -5.3 |

|           |            |                                                                                                                                                                                |       |
|-----------|------------|--------------------------------------------------------------------------------------------------------------------------------------------------------------------------------|-------|
| YJL157C   | FAR1       | Cyclin-dependent kinase inhibitor that mediates cell cycle arrest in response to pheromone; also forms a complex with Cdc24p, Ste4p, and Ste18p that may                       | -5.3  |
| YHR136C   | SPL2       | Protein with similarity to cyclin-dependent kinase inhibitors, overproduction suppresses a plc1 null mutation; green fluorescent protein (GFP)-fusion protein                  | -5.4  |
| YLR092W   | SUL2       | High affinity sulfate permease; sulfate uptake is mediated by specific sulfate transporters Sul1p and Sul2p, which control the concentration of endogenous                     | -5.5  |
| YHL016C   | DUR3       | Plasma membrane urea transporter, expression is highly sensitive to nitrogen catabolite repression and induced by allophanate, the last intermediate of the                    | -5.6  |
| YDR508C   | GNP1       | High-affinity glutamine permease, also transports Leu, Ser, Thr, Cys, Met and Asn; expression is fully dependent on Grr1p and modulated by the Ssy1p-Ptr3p                     | -5.6  |
| YKR034W   | DAL80      | Negative regulator of genes in multiple nitrogen degradation pathways; expression is regulated by nitrogen levels and by Gln3p; member of the GATA-                            | -5.7  |
| YDL227C   | HO         | Site-specific endonuclease required for gene conversion at the MAT locus (homothallic switching) through the generation of a ds DNA break; expression                          | -6.0  |
| YGR055W   | MUP1       | High affinity methionine permease, integral membrane protein with 13 putative membrane-spanning regions; also involved in cysteine uptake                                      | -6.0  |
| YBR208C   | DUR1,2     | Urea amidolyase, contains both urea carboxylase and allophanate hydrolase activities, degrades urea to CO <sub>2</sub> and NH <sub>3</sub> ; expression sensitive to nitrogen  | -6.0  |
| YNL279W   | PRM1       | Pheromone-regulated multispinning membrane protein involved in membrane fusion during mating; predicted to have 5 transmembrane segments and a                                 | -6.2  |
| YIL119C   | RPI1       | Putative transcriptional regulator; overexpression suppresses the heat shock sensitivity of wild-type RAS2 overexpression and also suppresses the cell lysis                   | -6.2  |
| YJL218W   |            | Putative protein of unknown function, similar to bacterial galactoside O-acetyltransferases; induced by oleate in an OAF1/PIP2-dependent manner;                               | -6.2  |
| YNL066W   | SUN4       | Cell wall protein related to glucanases, possibly involved in cell wall septation; member of the SUN family                                                                    | -6.3  |
| YAR071W   | PHO11      | One of three repressible acid phosphatases, a glycoprotein that is transported to the cell surface by the secretory pathway; induced by phosphate starvation                   | -6.5  |
| YNR044W   | AGA1       | Anchorage subunit of a-agglutinin of a-cells, highly O-glycosylated protein with N-terminal secretion signal and C-terminal signal for addition of GPI anchor to               | -6.6  |
| YGL089C   | MF(ALPHA)2 | Mating pheromone alpha-factor, made by alpha cells; interacts with mating type a cells to induce cell cycle arrest and other responses leading to mating;                      | -7.1  |
| YBR040W   | FIG1       | Integral membrane protein required for efficient mating; may participate in or regulate the low affinity Ca <sup>2+</sup> influx system, which affects intracellular signaling | -7.3  |
| YKR039W   | GAP1       | General amino acid permease; localization to the plasma membrane is regulated by nitrogen source                                                                               | -7.3  |
| YBL042C   | FUI1       | High affinity uridine permease, localized to the plasma membrane; not involved in uracil transport                                                                             | -7.5  |
| YPL274W   | SAM3       | High-affinity S-adenosylmethionine permease, required for utilization of S-adenosylmethionine as a sulfur source; has similarity to S-methylmethionine                         | -7.8  |
| YLL062C   | MHT1       | S-methylmethionine-homocysteine methyltransferase, functions along with Sam4p in the conversion of S-adenosylmethionine (AdoMet) to methionine to                              | -8.1  |
| YOR313C   | SPS4       | Protein whose expression is induced during sporulation; not required for sporulation; heterologous expression in E. coli induces the SOS response that                         | -8.1  |
| YNL142W   | MEP2       | Ammonium permease involved in regulation of pseudohyphal growth; belongs to a ubiquitous family of cytoplasmic membrane proteins that transport only                           | -8.2  |
| YOR315W   | SFG1       | Nuclear protein, putative transcription factor required for growth of superficial pseudohyphae (which do not invade the agar substrate) but not for invasive                   | -9.4  |
| YMR230W-A |            | Putative protein of unknown function                                                                                                                                           | -9.5  |
| YCL025C   | AGP1       | Low-affinity amino acid permease with broad substrate range, involved in uptake of asparagine, glutamine, and other amino acids; expression is                                 | -10.1 |
| YLL061W   | MMP1       | High-affinity S-methylmethionine permease, required for utilization of S-methylmethionine as a sulfur source; has similarity to S-adenosylmethionine                           | -10.3 |
| YML047C   | PRM6       | Pheromone-regulated protein, predicted to have 2 transmembrane segments; regulated by Ste12p during mating                                                                     | -12.0 |

|         |      |                                                                                                                                                            |       |
|---------|------|------------------------------------------------------------------------------------------------------------------------------------------------------------|-------|
| YBL029W |      | Hypothetical protein                                                                                                                                       | -13.5 |
| YPR194C | OPT2 | Oligopeptide transporter; member of the OPT family, with potential orthologs in <i>S. pombe</i> and <i>C. albicans</i>                                     | -13.7 |
| YGL255W | ZRT1 | High-affinity zinc transporter of the plasma membrane, responsible for the majority of zinc uptake; transcription is induced under low-zinc conditions by  | -20.0 |
| YHL028W | WSC4 | ER membrane protein involved in the translocation of soluble secretory proteins and insertion of membrane proteins into the ER membrane; may also          | -24.4 |
| YBR294W | SUL1 | High affinity sulfate permease; sulfate uptake is mediated by specific sulfate transporters Sul1p and Sul2p, which control the concentration of endogenous | -37.0 |
