# Supplementary material
Source: PubMed Central journal article supplement (PMC3370752)
Supplement: supp_56.6.2894_TableS2.pdf [file supp_56.6.2894_TableS2.pdf]

**Supplemental Table S2. List of 166 Transcription Factors Deleted in Mutants Assayed in this Study**

| ORF     | Gene               | Description                                                                                                                                                                                   |
|---------|--------------------|-----------------------------------------------------------------------------------------------------------------------------------------------------------------------------------------------|
| YER045C | ACA1 <sup>sa</sup> | Basic leucine zipper (bZIP) transcription factor of the ATF/CREB family, may regulate transcription of genes involved in utilization of non-optimal carbon sources                            |
| YLR131C | ACE2 <sup>*</sup>  | Transcription factor that activates expression of early G1-specific genes, localizes to daughter cell nuclei after cytokinesis and delays G1 progression in daughters, localization is        |
| YDR448W | ADA2 <sup>b</sup>  | Transcription coactivator, component of the ADA and SAGA transcriptional adaptor/HAT (histone acetyltransferase) complexes                                                                    |
| YDR216W | ADR1 <sup>*</sup>  | Carbon source-responsive zinc-finger transcription factor, required for transcription of the glucose-repressed gene ADH2, of peroxisomal protein genes, and of genes required for             |
| YGL071W | AFT1               | Transcription factor involved in iron utilization and homeostasis; binds the consensus site PyPuCACCCPu and activates the expression of target genes in response to changes in iron           |
| YPL202C | AFT2 <sup>*</sup>  | Iron-regulated transcriptional activator, required for iron homeostasis and resistance to oxidative stress; similar to Aft1p                                                                  |
| YMR042W | ARG80 <sup>*</sup> | Transcription factor involved in regulation of arginine-responsive genes; acts with Arg81p and Arg82p                                                                                         |
| YML099C | ARG81 <sup>*</sup> | Zinc-finger transcription factor of the Zn(2)-Cys(6) binuclear cluster domain type, involved in the regulation of arginine-responsive genes; acts with Arg80p and Arg82p                      |
| YDR421W | ARO80 <sup>*</sup> | Zinc finger transcriptional activator of the Zn2Cys6 family; activates transcription of aromatic amino acid catabolic genes in the presence of aromatic amino acids                           |
| YPR199C | ARR1 <sup>*</sup>  | Transcriptional activator of the bZIP family, required for transcription of genes involved in resistance to arsenic compounds                                                                 |
| YKL185W | ASH1 <sup>*</sup>  | Zinc-finger inhibitor of HO transcription; mRNA is localized and translated in the distal tip of anaphase cells, resulting in accumulation of Ash1p in daughter cell nuclei and inhibition of |
| YGR097W | ASK10 <sup>*</sup> | Component of the RNA polymerase II holoenzyme, phosphorylated in response to oxidative stress; has a role in destruction of Ssn8p, which relieves repression of stress-response               |
| YOR113W | AZF1 <sup>*</sup>  | Zinc-finger transcription factor, involved in induction of CLN3 transcription in response to glucose; genetic and physical interactions indicate a possible role in mitochondrial             |
| YKR099W | BAS1 <sup>*</sup>  | Myb-related transcription factor involved in regulating basal and induced expression of genes of the purine and histidine biosynthesis pathways                                               |
| YLR399C | BDF1               | Protein involved in transcription initiation at TATA-containing promoters; associates with the basal transcription factor TFIID; contains two bromodomains; corresponds to the C-terminal     |
| YKL005C | BYE1 <sup>*</sup>  | Negative regulator of transcription elongation, contains a TFIIS-like domain and a PHD finger, multicopy suppressor of temperature-sensitive <i>ess1</i> mutations, probably binds RNA        |
| YDR423C | CAD1 <sup>*</sup>  | AP-1-like bZIP transcriptional activator involved in multiple stress responses, iron metabolism, and pleiotropic drug resistance; controls a set of genes involved in stabilizing             |
| YMR280C | CAT8               | Zinc cluster transcriptional activator necessary for derepression of a variety of genes under non-fermentative growth conditions, active after diauxic shift, binds carbon source responsive  |
| YJR060W | CBF1 <sup>*</sup>  | Helix-loop-helix protein that binds the motif CACRTG, which is present at several sites including MET gene promoters and centromere DNA element I (CDEI); required for                        |
| YLR098C | CHA4 <sup>*</sup>  | DNA binding transcriptional activator, mediates serine/threonine activation of the catabolic L-serine (L-threonine) deaminase (CHA1); Zinc-finger protein with Zn[2]-Cys[6] fungal-type       |
| YOR028C | CIN5 <sup>*</sup>  | Basic leucine zipper transcriptional factor of the YAP-1 family that mediates pleiotropic drug resistance and salt tolerance; localizes constitutively to the nucleus                         |
| YDR223W | CRF1               | Transcriptional corepressor involved in the regulation of ribosomal protein gene transcription via the TOR signaling pathway and protein kinase A, phosphorylated by activated Yak1p          |
| YNL027W | CRZ1 <sup>*</sup>  | Transcription factor that activates transcription of genes involved in stress response; nuclear localization is positively regulated by calcineurin-mediated dephosphorylation                |
| YIL036W | CST6 <sup>*</sup>  | Basic leucine zipper (bZIP) transcription factor of the ATF/CREB family, activates transcription of genes involved in utilization of non-optimal carbon sources; involved in                  |
| YDR151C | CTH1               | Member of the CCCH zinc finger family; has similarity to mammalian Tis11 protein, which activates transcription and also has a role in mRNA degradation; may function with Tis11p in          |
| YGL166W | CUP2               | Copper-binding transcription factor; activates transcription of the metallothionein genes CUP1-1 and CUP1-2 in response to elevated copper concentrations                                     |
| YPL177C | CUP9 <sup>*</sup>  | Homeodomain-containing transcriptional repressor of PTR2, which encodes a major peptide transporter; imported peptides activate ubiquitin-dependent proteolysis, resulting in                 |

|         |        |                                                                                                                                                                                                            |
|---------|--------|------------------------------------------------------------------------------------------------------------------------------------------------------------------------------------------------------------|
| YKR034W | DAL80* | Negative regulator of genes in multiple nitrogen degradation pathways; expression is regulated by nitrogen levels and by Gln3p; member of the GATA-binding family, forms                                   |
| YIR023W | DAL81* | Positive regulator of genes in multiple nitrogen degradation pathways; contains DNA binding domain but does not appear to bind the dodecanucleotide sequence present in the promoter                       |
| YNL314W | DAL82* | Positive regulator of allophanate inducible genes; binds a dodecanucleotide sequence upstream of all genes that are induced by allophanate; contains an UISALL DNA-binding, a                              |
| YNL023C | FAP1   | Protein that binds to Fpr1p (FKBP12), conferring rapamycin resistance by competing with rapamycin for Fpr1p binding; has similarity to putative transcription factors, including D.                        |
| YIL131C | FKH1*  | Transcription factor of the forkhead family that regulates the cell cycle and pseudohyphal growth; also involved in chromatin silencing at HML and HMR                                                     |
| YNL068C | FKH2*  | Transcription factor of the forkhead family that regulates the cell cycle and pseudohyphal growth; also involved in chromatin silencing at HML and HMR; potential Cdc28p substrate                         |
| YER109C | FLO8   | Transcription factor required for flocculation, diploid filamentous growth, and haploid invasive growth; genome reference strain S288C and most laboratory strains have a mutation in this                 |
| YGL254W | FZF1*  | Transcription factor involved in sulfite metabolism, sole identified regulatory target is SSU1, overexpression suppresses sulfite-sensitivity of many unrelated mutants due to                             |
| YDR009W | GAL3*  | Transcriptional regulator involved in activation of the GAL genes in response to galactose; forms a complex with Gal80p to relieve Gal80p inhibition of Gal4p; binds galactose and ATP                     |
| YPL248C | GAL4*  | DNA-binding transcription factor required for the activation of the GAL genes in response to galactose; repressed by Gal80p and activated by Gal3p                                                         |
| YML051W | GAL80* | Transcriptional regulator involved in the repression of GAL genes in the absence of galactose; inhibits transcriptional activation by Gal4p; inhibition relieved by Gal3p or Gal1p                         |
| YFL021W | GAT1*  | Transcriptional activator of genes involved in nitrogen catabolite repression, member of the GATA family of DNA binding proteins; activity and localization regulated by nitrogen limitation               |
| YMR136W | GAT2   | Protein containing GATA family zinc finger motifs; similar to Gln3p and Dal80p; expression repressed by leucine                                                                                            |
| YLR013W | GAT3*  | Protein containing GATA family zinc finger motifs                                                                                                                                                          |
| YIR013C | GAT4   | Protein containing GATA family zinc finger motifs                                                                                                                                                          |
| YEL009C | GCN4*  | Transcriptional activator of amino acid biosynthetic genes in response to amino acid starvation; expression is tightly regulated at both the transcriptional and translational levels                      |
| YNL199C | GCR2*  | Transcriptional activator of genes involved in glycolysis; interacts and functions with the DNA-binding protein Gcr1p                                                                                      |
| YDR096W | GIS1   | Transcriptional factor, involved in the expression of genes during nutrient limitation; also involved in the negative regulation of DPP1 and PHR1                                                          |
| YER040W | GLN3*  | Transcriptional activator of genes regulated by nitrogen catabolite repression (NCR), localization and activity regulated by quality of nitrogen source                                                    |
| YGL181W | GTS1*  | Protein containing a zinc-finger in the N-terminus and a long Gln-rich region in the C-terminus; regulates ultradian rhythm, cell size, cell cycle, lifespan, sporulation, heat                            |
| YJL110C | GZF3*  | GATA zinc finger protein and Dal80p homolog that negatively regulates nitrogen catabolic gene expression by competing with Gat1p for GATA site binding; function requires a                                |
| YPR008W | HAA1*  | Transcriptional activator involved in the transcription of TPO2, HSP30 and other genes encoding membrane stress proteins; despite sequence similarity with the transcription factor                        |
| YFL031W | HAC1*  | bZIP transcription factor (ATF/CREB1 homolog) that regulates the unfolded protein response, via UPRE binding, and membrane biogenesis; ER stress-induced splicing pathway                                  |
| YOL089C | HAL9*  | Putative transcription factor containing a zinc finger; overexpression increases salt tolerance through increased expression of the ENA1 (Na <sup>+</sup> /Li <sup>+</sup> extrusion pump) gene while gene |
| YGL237C | HAP2*  | Subunit of the heme-activated, glucose-repressed Hap2p/3p/4p/5p CCAAT-binding complex, a transcriptional activator and global regulator of respiratory gene expression; contains                           |
| YBL021C | HAP3*  | Subunit of the heme-activated, glucose-repressed Hap2p/3p/4p/5p CCAAT-binding complex, a transcriptional activator and global regulator of respiratory gene expression; contains                           |
| YKL109W | HAP4*  | Subunit of the heme-activated, glucose-repressed Hap2p/3p/4p/5p CCAAT-binding complex, a transcriptional activator and global regulator of respiratory gene expression; provides the                       |
| YOR358W | HAP5*  | Subunit of the heme-activated, glucose-repressed Hap2/3/4/5 CCAAT-binding complex, a transcriptional activator and global regulator of respiratory gene expression; required for                           |
| YCR065W | HCM1   | Forkhead transcription factor that drives S-phase specific expression of genes involved in chromosome segregation, spindle dynamics, and budding; suppressor of calmodulin mutants                         |

|           |        |                                                                                                                                                                                            |
|-----------|--------|--------------------------------------------------------------------------------------------------------------------------------------------------------------------------------------------|
| YBL008W   | HIR1*  | Non-essential transcriptional corepressor involved in the cell cycle-regulated transcription of histone H2A, H2B, H3 and H4 genes; contributes to nucleosome formation, heterochromatic    |
| YOR038C   | HIR2*  | Non-essential transcriptional corepressor involved in the cell cycle-regulated transcription of histone H2A, H2B, H3, and H4 genes; recruits Swi-Snf complexes to histone gene             |
| YJR140C   | HIR3*  | Transcriptional corepressor involved in the cell cycle-regulated transcription of histone genes HTA1, HTB1, HHT1, and HHT2; involved in position-dependent gene silencing and              |
| YOR032C   | HMS1*  | Basic helix-loop-helix (bHLH) protein with similarity to myc-family transcription factors; overexpression confers hyperfilamentous growth and suppresses the pseudohyphal                  |
| YJR147W   | HMS2*  | Protein with similarity to heat shock transcription factors; overexpression suppresses the pseudohyphal filamentation defect of a diploid mep1 mep2 homozygous null mutant                 |
| YMR172W   | HOT1   | Transcription factor required for the transient induction of glycerol biosynthetic genes GPD1 and GPP2 in response to high osmolarity; targets Hog1p to osmostress responsive              |
| YBR215W   | HPC2   | Highly charged, basic protein required for normal cell-cycle regulation of histone gene transcription; mutants display strong synthetic defects with subunits of FACT, a complex that      |
| YJR094C   | IME1*  | Master regulator of meiosis that is active only during meiotic events, activates transcription of early meiotic genes through interaction with Ume6p, degraded by the 26S proteasome       |
| YIL154C   | IMP2'  | Transcriptional activator involved in maintenance of ion homeostasis and protection against DNA damage caused by bleomycin and other oxidants, contains a C-terminal leucine-rich          |
| YDR123C   | INO2*  | Component of the heteromeric Ino2p/Ino4p basic helix-loop-helix transcription activator that binds inositol/choline-responsive elements (ICREs), required for derepression of phospholipid |
| YOL108C   | INO4*  | Transcription factor required for derepression of inositol-choline-regulated genes involved in phospholipid synthesis; forms a complex, with Ino2p, that binds the inositol-choline-       |
| YKL032C   | IXR1*  | Protein that binds DNA containing intrastrand cross-links formed by cisplatin, contains two HMG (high mobility group box) domains, which confer the ability to bend cisplatin-modified     |
| YCL055W   | KAR4   | Transcription factor required for induction of KAR3 and Clk1 during mating, also required during meiosis; exists in two forms, a slower-migrating form more abundant during vegetative     |
| YLR451W   | LEU3*  | Zinc-finger transcription factor that regulates genes involved in branched chain amino acid biosynthesis and ammonia assimilation; positively regulated by alpha-isopropylmalate, an       |
| YDR034C   | LYS14  | Transcriptional activator involved in regulation of genes of the lysine biosynthesis pathway; requires 2-aminoadipate semialdehyde as co-inducer                                           |
| YMR021C   | MAC1*  | Copper-sensing transcription factor involved in regulation of genes required for high affinity copper transport                                                                            |
| YGR288W   | MAL13* | MAL-activator protein, part of complex locus MAL1; nonfunctional in genomic reference strain S288C                                                                                         |
| YBR297W   | MAL33* | MAL-activator protein, part of complex locus MAL3; nonfunctional in genomic reference strain S288C                                                                                         |
| YOR298C-A | MBF1*  | Transcriptional coactivator that bridges the DNA-binding region of Gcn4p and TATA-binding protein Spt15p; suppressor of frameshift mutations                                               |
| YDL056W   | MBP1*  | Transcription factor involved in regulation of cell cycle progression from G1 to S phase, forms a complex with Swi6p that binds to MluI cell cycle box regulatory element in promoters of  |
| YIL128W   | MET18* | DNA repair and TFIIH regulator, required for both nucleotide excision repair (NER) and RNA polymerase II (RNAP II) transcription; involved in telomere maintenance                         |
| YIR017C   | MET28* | Transcriptional activator in the Cbf1p-Met4p-Met28p complex, participates in the regulation of sulfur metabolism                                                                           |
| YPL038W   | MET31* | Zinc-finger DNA-binding protein, involved in regulating expression of the methionine biosynthetic genes, similar to Met32p                                                                 |
| YDR253C   | MET32* | Zinc-finger DNA-binding protein, involved in regulating expression of the methionine biosynthetic genes, similar to Met31p                                                                 |
| YGR249W   | MGA1*  | Protein similar to heat shock transcription factor; multicopy suppressor of pseudohyphal growth defects of ammonia permease mutants                                                        |
| YIR033W   | MGA2   | ER membrane protein involved in regulation of OLE1 transcription, acts with homolog Spt23p; inactive ER form dimerizes and one subunit is then activated by                                |
| YGL035C   | MIG1*  | Transcription factor involved in glucose repression; C2H2 zinc finger protein similar to mammalian Egr and Wilms tumor proteins                                                            |
| YGL209W   | MIG2*  | Protein containing zinc fingers, involved in repression, along with Mig1p, of SUC2 (invertase) expression by high levels of glucose; binds to Mig1p-binding sites in SUC2 promoter         |
| YER028C   | MIG3*  | Probable transcriptional repressor involved in response to toxic agents such as hydroxyurea that inhibit ribonucleotide reductase; phosphorylation by Snf1p or the Mec1p pathway           |

|         |         |                                                                                                                                                                                                |
|---------|---------|------------------------------------------------------------------------------------------------------------------------------------------------------------------------------------------------|
| YMR070W | MOT3*   | Nuclear transcription factor with two Cys2-His2 zinc fingers; involved in repression of a subset of hypoxic genes by Rox1p, repression of several DAN/TIR genes during aerobic                 |
| YOL116W | MSN1*   | Transcriptional activator involved in regulation of invertase and glucoamylase expression, invasive growth and pseudohyphal differentiation, iron uptake, chromium accumulation, and           |
| YMR037C | MSN2*   | Transcriptional activator related to Msn4p; activated in stress conditions, which results in translocation from the cytoplasm to the nucleus; binds DNA at stress response elements of         |
| YKL062W | MSN4*   | Transcriptional activator related to Msn2p; activated in stress conditions, which results in translocation from the cytoplasm to the nucleus; binds DNA at stress response elements of         |
| YMR164C | MSS11*  | Transcription factor involved in regulation of invasive growth and starch degradation; controls the activation of MUC1 and STA2 in response to nutritional signals                             |
| YHR124W | NDT80*  | Meiosis-specific transcription factor required for exit from pachytene and for full meiotic recombination; activates middle sporulation genes; competes with Sum1p for binding to              |
| YDR043C | NRG1*   | Transcriptional repressor that recruits the Cyc8p-Tup1p complex to promoters; mediates glucose repression and negatively regulates a variety of processes including filamentous                |
| YBR066C | NRG2    | Transcriptional repressor that mediates glucose repression and negatively regulates filamentous growth; has similarity to Nrg1p                                                                |
| YNR009W | NRM1    | Transcriptional co-repressor of MBF (MCB binding factor)-regulated gene expression; Nrm1p associates stably with promoters via MBF to repress transcription upon exit from G1 phase            |
| YAL051W | OAF1*   | Oleate-activated transcription factor, acts alone and as a heterodimer with Pip2p; activates genes involved in beta-oxidation of fatty acids and peroxisome organization and biogenesis        |
| YHL020C | OPI1*   | Transcriptional regulator of a variety of genes; phosphorylation by protein kinase A stimulates Opi1p function in negative regulation of phospholipid biosynthetic genes; involved in telomere |
| YGL013C | PDR1*   | Zinc cluster protein that is a master regulator involved in recruiting other zinc cluster proteins to pleiotropic drug response elements (PDREs) to fine tune the regulation of multidrug      |
| YBL005W | PDR3*   | Transcriptional activator of the pleiotropic drug resistance network, regulates expression of ATP-binding cassette (ABC) transporters through binding to cis-acting sites known as             |
| YLR266C | PDR8    | Transcription factor; targets include ATP-binding cassette (ABC) transporters, major facilitator superfamily transporters, and other genes involved in the pleiotropic drug                    |
| YKL043W | PHD1*   | Transcriptional activator that enhances pseudohyphal growth; regulates expression of FLO11, an adhesin required for pseudohyphal filament formation; similar to StuA, an A.                    |
| YDL106C | PHO2*   | Homeobox transcription factor; regulatory targets include genes involved in phosphate metabolism; binds cooperatively with Pho4p to the PHO5 promoter; phosphorylation of                      |
| YFR034C | PHO4*   | Basic helix-loop-helix (bHLH) transcription factor; binds cooperatively with Pho2p to the PHO5 promoter; function is regulated by phosphorylation at multiple sites and by phosphate           |
| YOR363C | PIP2*   | Autoregulatory oleate-specific transcriptional activator of peroxisome proliferation, contains Zn(2)-Cys(6) cluster domain, forms heterodimer with Oaf1p, binds oleate response elements       |
| YIL122W | POG1    | Putative transcriptional activator that promotes recovery from pheromone induced arrest; inhibits both alpha-factor induced G1 arrest and repression of CLN1 and CLN2 via SCB/MCB              |
| YLR014C | PPR1*   | Zinc finger transcription factor containing a Zn(2)-Cys(6) binuclear cluster domain, positively regulates transcription of genes involved in uracil biosynthesis; activity may be modulated by |
| YKL015W | PUT3*   | Transcriptional activator of proline utilization genes, constitutively binds PUT1 and PUT2 promoter sequences and undergoes a conformational change to form the active state; has a            |
| YOR380W | RDR1*   | Transcriptional repressor involved in the control of multidrug resistance; negatively regulates expression of the PDR5 gene; member of the Gal4p family of zinc cluster proteins               |
| YCR106W | RDS1*   | Zinc cluster protein involved in conferring resistance to cycloheximide                                                                                                                        |
| YPL133C | RDS2    | Zinc cluster protein involved in conferring resistance to ketoconazole                                                                                                                         |
| YLR176C | RFX1*   | Protein involved in DNA damage and replication checkpoint pathway; recruits repressors Tup1p and Cyc8p to promoters of DNA damage-inducible genes; similar to a family of                      |
| YMR182C | RGM1*   | Putative transcriptional repressor with proline-rich zinc fingers; overproduction impairs cell growth                                                                                          |
| YKL038W | RGT1*   | Glucose-responsive transcription factor that regulates expression of several glucose transporter (HXT) genes in response to glucose; binds to promoters and acts both as a                     |
| YHL027W | RIM101* | Transcriptional repressor involved in response to pH and in cell wall construction; required for alkaline pH-stimulated haploid invasive growth and sporulation; activated by proteolytic      |
| YPL089C | RLM1*   | MADS-box transcription factor, component of the protein kinase C-mediated MAP kinase pathway involved in the maintenance of cell integrity; phosphorylated and activated by the                |

|         |        |                                                                                                                                                                                            |
|---------|--------|--------------------------------------------------------------------------------------------------------------------------------------------------------------------------------------------|
| YGR044C | RME1*  | Zinc finger protein involved in control of meiosis; prevents meiosis by repressing IME1 expression and promotes mitosis by activating CLN2 expression; directly repressed by a1-a2         |
| YPR065W | ROX1*  | Heme-dependent repressor of hypoxic genes; contains an HMG domain that is responsible for DNA bending activity                                                                             |
| YER169W | RPH1*  | Transcriptional repressor of PHR1, which is a photolyase induced by DNA damage; binds to AG(4) (C(4)T) sequence upstream of PHR1; Rph1p phosphorylation during DNA damage is               |
| YDL020C | RPN4*  | Transcription factor that stimulates expression of proteasome genes; Rpn4p levels are in turn regulated by the 26S proteasome in a negative feedback control mechanism; RPN4 is            |
| YJR127C | RSF2   | Zinc-finger protein involved in transcriptional control of both nuclear and mitochondrial genes, many of which specify products required for glycerol-based growth, respiration, and other |
| YOL067C | RTG1*  | Transcription factor (bHLH) involved in interorganelle communication between mitochondria, peroxisomes, and nucleus                                                                        |
| YGL252C | RTG2   | Sensor of mitochondrial dysfunction; regulates the subcellular location of Rtg1p and Rtg3p, transcriptional activators of the retrograde (RTG) and TOR pathways; Rtg2p is inhibited by     |
| YBL103C | RTG3*  | Basic helix-loop-helix-leucine zipper (bHLH/Zip) transcription factor that forms a complex with another bHLH/Zip protein, Rtg1p, to activate the retrograde (RTG) and TOR pathways         |
| YOR315W | SFG1   | Nuclear protein, putative transcription factor required for growth of superficial pseudohyphae (which do not invade the agar substrate) but not for invasive pseudohyphal growth; may act  |
| YOR140W | SFL1*  | Transcription repressor involved in regulation of flocculation-related genes, inhibits transcription by recruiting general corepressor Cyc8p-Tup1p to different promoters;                 |
| YLR403W | SFP1*  | Transcription factor that controls expression of many ribosome biogenesis genes in response to nutrients and stress, regulates G2/M transitions during mitotic cell cycle and DNA-damage   |
| YNL257C | SIP3*  | Protein that activates transcription through interaction with DNA-bound Snf1p, C-terminal region has a putative leucine zipper motif; potential Cdc28p substrate                           |
| YJL089W | SIP4*  | C6 zinc cluster transcriptional activator that binds to the carbon source-responsive element (CSRE) of gluconeogenic genes; involved in the positive regulation of gluconeogenesis;        |
| YHR206W | SKN7*  | Nuclear response regulator and transcription factor, part of a branched two-component signaling system; required for optimal induction of heat-shock genes in response to oxidative        |
| YNL167C | SKO1*  | Basic leucine zipper (bZIP) transcription factor of the ATF/CREB family, forms a complex with Tup1p and Ssn6p to both activate and repress transcription; cytosolic and nuclear            |
| YBR182C | SMP1*  | Putative transcription factor involved in regulating the response to osmotic stress; member of the MADS-box family of transcription factors                                                |
| YMR016C | SOK2*  | Nuclear protein that plays a regulatory role in the cyclic AMP (cAMP)-dependent protein kinase (PKA) signal transduction pathway; negatively regulates pseudohyphal differentiation;       |
| YKL020C | SPT23* | ER membrane protein involved in regulation of OLE1 transcription, acts with homolog Mga2p; inactive ER form dimerizes and one subunit is then activated by ubiquitin/proteasome-           |
| YMR053C | STB2*  | Protein that interacts with Sin3p in a two-hybrid assay and is part of a large protein complex with Sin3p and Stb1p                                                                        |
| YHR178W | STB5*  | Activator of multidrug resistance genes, forms a heterodimer with Pdr1p; contains a Zn(II)2Cys6 zinc finger domain that interacts with a PDRE (pleiotropic drug resistance                 |
| YDR463W | STP1*  | Transcription factor, activated by proteolytic processing in response to signals from the SPS sensor system for external amino acids; activates transcription of amino acid permease       |
| YHR006W | STP2*  | Transcription factor, activated by proteolytic processing in response to signals from the SPS sensor system for external amino acids; activates transcription of amino acid permease       |
| YDR310C | SUM1*  | Transcriptional repressor required for mitotic repression of middle sporulation-specific genes; involved in telomere maintenance, regulated by the pachytene checkpoint                    |
| YGL162W | SUT1*  | Transcription factor of the Zn[II]2Cys6 family involved in sterol uptake; involved in induction of hypoxic gene expression                                                                 |
| YPR009W | SUT2*  | Putative transcription factor; multicopy suppressor of mutations that cause low activity of the cAMP/protein kinase A pathway; highly similar to Sut1p                                     |
| YER111C | SWI4*  | DNA binding component of the SBF complex (Swi4p-Swi6p), a transcriptional activator that in concert with MBF (Mbp1-Swi6p) regulates late G1-specific transcription of targets including    |
| YDR146C | SWI5*  | Transcription factor that activates transcription of genes expressed in G1 phase and at the G1/M boundary; localization to the nucleus occurs during G1 and appears to be regulated by     |
| YLR182W | SWI6*  | Transcription cofactor, forms complexes with DNA-binding proteins Swi4p and Mbp1p to regulate transcription at the G1/S transition; involved in meiotic gene expression; localization      |
| YBR083W | TEC1*  | Transcription factor required for full Ty1 expression, Ty1-mediated gene activation, and haploid invasive and diploid pseudohyphal growth; TEA/ATTS DNA-binding domain family              |

|         |       |                                                                                                                                                                                               |
|---------|-------|-----------------------------------------------------------------------------------------------------------------------------------------------------------------------------------------------|
| YBR240C | THI2* | Zinc finger protein of the Zn(II)2Cys6 type, probable transcriptional activator of thiamine biosynthetic genes                                                                                |
| YLR183C | TOS4  | Transcription factor that binds to a number of promoter regions, particularly promoters of some genes involved in pheromone response and cell cycle; potential Cdc28p substrate;              |
| YGL096W | TOS8* | Homeodomain-containing transcription factor; SBF regulated target gene that in turn regulates expression of genes involved in G1/S phase events such as bud site selection, bud               |
| YCR084C | TUP1  | General repressor of transcription, forms complex with Cyc8p, involved in the establishment of repressive chromatin structure through interactions with histones H3 and H4, appears to        |
| YOR344C | TYE7* | Serine-rich protein that contains a basic-helix-loop-helix (bHLH) DNA binding motif; binds E-boxes of glycolytic genes and contributes to their activation; may function as a transcriptional |
| YDL170W | UGA3* | Transcriptional activator necessary for gamma-aminobutyrate (GABA)-dependent induction of GABA genes (such as UGA1, UGA2, UGA4); zinc-finger transcription factor of the Zn(2)-               |
| YPL139C | UME1  | Negative regulator of meiosis, required for repression of a subset of meiotic genes during vegetative growth, binding of histone deacetylase Rpd3p required for activity, contains a NEE      |
| YDR207C | UME6* | Key transcriptional regulator of early meiotic genes, binds URS1 upstream regulatory sequence, couples metabolic responses to nutritional cues with initiation and progression of             |
| YDR213W | UPC2* | Sterol regulatory element binding protein, induces transcription of sterol transport and biosynthetic genes; involved in the anaerobic induction of DAN/TIR mannoproteins and                 |
| YML076C | WAR1* | Homodimeric Zn2Cys6 zinc finger transcription factor; binds to a weak acid response element to induce transcription of PDR12 and FUN34, encoding an acid transporter and a                    |
| YOR230W | WTM1* | Transcriptional repressor involved in regulation of meiosis and silencing; contains WD repeats                                                                                                |
| YOR229W | WTM2* | Transcriptional repressor involved in regulation of meiosis and silencing; contains WD repeats                                                                                                |
| YIL101C | XBP1* | Transcriptional repressor that binds to promoter sequences of the cyclin genes, CYS3, and SMF2; expression is induced by stress or starvation during mitosis, and late in meiosis;            |
| YML007W | YAP1* | Basic leucine zipper (bZIP) transcription factor required for oxidative stress tolerance; mediates pleiotropic drug and metal resistance; localized to the nucleus in response to the         |
| YHL009C | YAP3* | Basic leucine zipper (bZIP) transcription factor                                                                                                                                              |
| YIR018W | YAP5* | Basic leucine zipper (bZIP) transcription factor                                                                                                                                              |
| YDR259C | YAP6* | Putative basic leucine zipper (bZIP) transcription factor; overexpression increases sodium and lithium tolerance                                                                              |
| YOL028C | YAP7* | Putative basic leucine zipper (bZIP) transcription factor                                                                                                                                     |
| YDR451C | YHP1* | One of two homeobox transcriptional repressors (see also Yox1p), that bind to Mcm1p and to early cell cycle box (ECB) elements of cell cycle regulated genes, thereby restricting ECB-        |
| YML027W | YOX1* | Homeodomain-containing transcriptional repressor, binds to Mcm1p and to early cell cycle boxes (ECBs) in the promoters of cell cycle-regulated genes expressed in M/G1 phase;                 |
| YOR172W | YRM1  | Zn2-Cys6 zinc-finger transcription factor that activates genes involved in multidrug resistance; paralog of Yrr1p, acting on an overlapping set of target genes                               |
| YOR162C | YRR1* | Zn2-Cys6 zinc-finger transcription factor that activates genes involved in multidrug resistance; paralog of Yrm1p, acting on an overlapping set of target genes                               |
| YJL056C | ZAP1* | Zinc-regulated transcription factor, binds to zinc-responsive promoter elements to induce transcription of certain genes in the presence of zinc; regulates its own transcription; contains   |
|         |       |                                                                                                                                                                                               |

<sup>a</sup>Genes marked with an asterisk encode DNA-binding transcriptional regulators as described in Harbison et al., 2004, Nature, 431:99

<sup>b</sup>Genes without an asterisk are annotated as encoding transcription factors in the SGD database ([www.yeastgenome.org](http://www.yeastgenome.org))
