# Supplementary material
Source: PubMed Central journal article supplement (PMC3370752)
Supplement: supp_56.6.2894_TableS3.pdf [file supp_56.6.2894_TableS3.pdf]

| <b>Supplemental Table S3. Gene Expression Responses to 6NDA in S.cerevisiae Strain BY4742</b> |                    |                                                                                                                                                        |                              |                             |
|-----------------------------------------------------------------------------------------------|--------------------|--------------------------------------------------------------------------------------------------------------------------------------------------------|------------------------------|-----------------------------|
| <b>ORF</b>                                                                                    | <b>Gene Symbol</b> | <b>Description</b>                                                                                                                                     | <b>Fold-change in BY4742</b> | <b>Fold-change in S288C</b> |
| YHR139C                                                                                       | SPS100             | Protein required for spore wall maturation; expressed during sporulation; may be a component of the spore wall; expression also induced in cells       | 74.9                         | 22.5                        |
| YBR054W                                                                                       | YRO2               | Putative protein of unknown function; the authentic, non-tagged protein is detected in a phosphorylated state in highly purified mitochondria in high- | 41.6                         | 7.7                         |
| YPL223C                                                                                       | GRE1               | Hydrophilin of unknown function; stress induced (osmotic, ionic, oxidative, heat shock and heavy metals); regulated by the HOG pathway                 | 38.1                         | 4.1                         |
| YDR380W                                                                                       | ARO10              | Phenylpyruvate decarboxylase, catalyzes decarboxylation of phenylpyruvate to phenylacetaldehyde, which is the first specific step in                   | 33.6                         | 9.7                         |
| YKL163W                                                                                       | PIR3               | O-glycosylated covalently-bound cell wall protein required for cell wall stability; expression is cell cycle regulated, peaking in M/G1 and also       | 29.7                         | 16.1                        |
| YJL116C                                                                                       | NCA3               | Protein that functions with Nca2p to regulate mitochondrial expression of subunits 6 (Atp6p) and 8 (Atp8p) of the Fo-F1 ATP synthase; member of        | 29.6                         | 23.2                        |
| YOL052C-A                                                                                     | DDR2               | Multistress response protein, expression is activated by a variety of xenobiotic agents and environmental or physiological stresses                    | 27.1                         | 13.8                        |
| YBR072W                                                                                       | HSP26              | Small heat shock protein (sHSP) with chaperone activity; forms hollow, sphere-shaped oligomers that suppress unfolded proteins aggregation;            | 27.1                         | 6.0                         |
| YHR096C                                                                                       | HXT5               | Hexose transporter with moderate affinity for glucose, induced in the presence of non-fermentable carbon sources, induced by a decrease in             | 26.5                         | 17.0                        |
| YHR087W                                                                                       | RTC3               | Protein of unknown function involved in RNA metabolism; has structural similarity to SBDS, the human protein mutated in Shwachman-Diamond              | 22.7                         | 21.5                        |
| YOR273C                                                                                       | TPO4               | Polyamine transport protein, recognizes spermine, putrescine, and spermidine; localizes to the plasma membrane; member of the major                    | 22.1                         | 7.3                         |
| YGR213C                                                                                       | RTA1               | Protein involved in 7-aminocholesterol resistance; has seven potential membrane-spanning regions; expression is induced under both low-                | 20.8                         | 84.1                        |
| YGR043C                                                                                       | NQM1               | Transaldolase of unknown function; transcription is repressed by Mot1p and induced by alpha-factor and during diauxic shift                            | 20.6                         | 73.0                        |
| YMR169C                                                                                       | ALD3               | Cytoplasmic aldehyde dehydrogenase, involved in beta-alanine synthesis; uses NAD+ as the preferred coenzyme; very similar to Ald2p;                    | 20.3                         | 9.1                         |
| YNL160W                                                                                       | YGP1               | Cell wall-related secretory glycoprotein; induced by nutrient deprivation-associated growth arrest and upon entry into stationary phase; may be        | 20.2                         | 18.9                        |
| YDR034W-B                                                                                     |                    |                                                                                                                                                        | 20.1                         | 31.7                        |
| YOR134W                                                                                       | BAG7               | Rho GTPase activating protein (RhoGAP), stimulates the intrinsic GTPase activity of Rho1p, which plays a role in actin cytoskeleton                    | 18.9                         | 156.5                       |
| YER185W                                                                                       | PUG1               | Plasma membrane protein with roles in the uptake of protoporphyrin IX and the efflux of heme; expression is induced under both low-heme and            | 17.7                         | 11.5                        |
| YAL061W                                                                                       | BDH2               | Putative medium-chain alcohol dehydrogenase with similarity to BDH1; transcription induced by constitutively active PDR1 and PDR3                      | 17.1                         | 13.2                        |
| YBL049W                                                                                       | MOH1               | Protein of unknown function, has homology to kinase Snf7p; not required for growth on nonfermentable carbon sources; essential for survival in         | 16.9                         | 8.2                         |
| YLR054C                                                                                       | OSW2               | Protein of unknown function proposed to be involved in the assembly of the spore wall                                                                  | 16.0                         | 44.4                        |
| YGR052W                                                                                       | FMP48              | Putative protein of unknown function; the authentic, non-tagged protein is detected in highly purified mitochondria in high-throughput studies;        | 15.8                         | 3.8                         |
| YDL223C                                                                                       | HBT1               | Substrate of the Hub1p ubiquitin-like protein that localizes to the shmoo tip (mating projection); mutants are defective for mating projection         | 15.6                         | 3.8                         |
| YGL121C                                                                                       | GPG1               | Proposed gamma subunit of the heterotrimeric G protein that interacts with the receptor Gpr1p; involved in regulation of pseudohyphal growth;          | 15.1                         | 17.8                        |
| YLR346C                                                                                       |                    |                                                                                                                                                        | 14.3                         | 7.4                         |
| YMR175W                                                                                       | SIP18              | Phospholipid-binding protein; expression is induced by osmotic stress                                                                                  | 13.9                         | 3.5                         |
| YDR070C                                                                                       | FMP16              | Putative protein of unknown function; proposed to be involved in responding to conditions of stress; the authentic, non-tagged protein is              | 13.2                         | 3.4                         |
| YNL194C                                                                                       |                    |                                                                                                                                                        | 13.2                         | 12.4                        |
| YNL093W                                                                                       | YPT53              | Rab family GTPase, similar to Ypt51p and Ypt52p and to mammalian rab5; required for vacuolar protein sorting and endocytosis                           | 12.8                         | 17.9                        |
| YGR256W                                                                                       | GND2               | 6-phosphogluconate dehydrogenase (decarboxylating), catalyzes an NADPH regenerating reaction in the pentose phosphate pathway;                         | 12.7                         | 13.6                        |
| YDL222C                                                                                       | FMP45              | Integral membrane protein localized to mitochondria (untagged protein); required for sporulation and maintaining sphingolipid content; has             | 12.3                         | 3.8                         |

|           |       |                                                                                                                                                     |      |      |
|-----------|-------|-----------------------------------------------------------------------------------------------------------------------------------------------------|------|------|
| YIL101C   | XBP1  | Transcriptional repressor that binds to promoter sequences of the cyclin genes, CYS3, and SMF2; expression is induced by stress or starvation       | 12.2 | 22.5 |
| YNR034W-A |       |                                                                                                                                                     | 12.1 |      |
| YER037W   | PHM8  | Protein of unknown function, expression is induced by low phosphate levels and by inactivation of Pho85p                                            | 11.6 | 13.8 |
| YOL084W   | PHM7  | Protein of unknown function, expression is regulated by phosphate levels; green fluorescent protein (GFP)-fusion protein localizes to the cell      | 10.6 | 6.1  |
| YGR236C   | SPG1  | Protein required for survival at high temperature during stationary phase; not required for growth on nonfermentable carbon sources; the authentic, | 10.2 | 21.2 |
| YNR064C   |       |                                                                                                                                                     | 10.2 | 10.1 |
| YLR031W   |       |                                                                                                                                                     | 10.0 | 6.6  |
| YJR078W   | BNA2  | Putative tryptophan 2,3-dioxygenase or indoleamine 2,3-dioxygenase, required for de novo biosynthesis of NAD from tryptophan via                    | 9.8  | 10.7 |
| YBR085C-A |       |                                                                                                                                                     | 9.8  | 8.7  |
| YBR117C   | TKL2  | Transketolase, similar to Tkl1p; catalyzes conversion of xylulose-5-phosphate and ribose-5-phosphate to sedoheptulose-7-phosphate and               | 9.7  | 6.6  |
| YMR174C   | PAI3  | Cytoplasmic proteinase A (Pep4p) inhibitor, dependent on Pbs2p and Hog1p protein kinases for osmotic induction; intrinsically unstructured, N-      | 9.4  | 7.4  |
| YDR453C   | TSA2  | Stress inducible cytoplasmic thioredoxin peroxidase; cooperates with Tsa1p in the removal of reactive oxygen, nitrogen and sulfur species           | 9.4  | 7.3  |
| YOR049C   | RSB1  | Suppressor of sphingoid long chain base (LCB) sensitivity of an LCB-lyase mutation; putative integral membrane transporter or flippase that         | 9.0  | 12.0 |
| YMR107W   | SPG4  | Protein required for survival at high temperature during stationary phase; not required for growth on nonfermentable carbon sources                 | 8.5  | 8.1  |
| YLR030W   |       |                                                                                                                                                     | 8.4  | 4.4  |
| YER150W   | SPI1  | GPI-anchored cell wall protein involved in weak acid resistance; basal expression requires Msn2p/Msn4p; expression is induced under                 | 8.3  | 6.0  |
| YOL151W   | GRE2  | 3-methylbutanal reductase and NADPH-dependent methylglyoxal reductase (D-lactaldehyde dehydrogenase); stress induced (osmotic,                      | 8.2  | 7.7  |
| YML128C   | MSC1  | Protein of unknown function; mutant is defective in directing meiotic recombination events to homologous chromatids; the authentic, non-            | 8.1  | 3.8  |
| YML054C   | CYB2  | Cytochrome b2 (L-lactate cytochrome-c oxidoreductase), component of the mitochondrial intermembrane space, required for lactate utilization;        | 7.9  | 2.6  |
| YGR088W   | CTT1  | Cytosolic catalase T, has a role in protection from oxidative damage by hydrogen peroxide                                                           | 7.9  | 7.2  |
| YKL107W   |       |                                                                                                                                                     | 7.9  | 5.0  |
| YPR160W   | GPH1  | Non-essential glycogen phosphorylase required for the mobilization of glycogen, activity is regulated by cyclic AMP-mediated phosphorylation,       | 7.8  |      |
| YJR008W   |       |                                                                                                                                                     | 7.8  | 2.6  |
| YLR142W   | PUT1  | Proline oxidase, nuclear-encoded mitochondrial protein involved in utilization of proline as sole nitrogen source; PUT1 transcription is            | 7.7  |      |
| YFL014W   | HSP12 | Plasma membrane localized protein that protects membranes from desiccation; induced by heat shock, oxidative stress, osmostress,                    | 7.5  | 42.1 |
| YJR095W   | SFC1  | Mitochondrial succinate-fumarate transporter, transports succinate into and fumarate out of the mitochondrion; required for ethanol and acetate     | 7.2  |      |
| YGR131W   | FHN1  | Protein of unknown function; induced by ketoconazole; promoter region contains sterol regulatory element motif, which has been identified as a      | 7.2  | 6.7  |
| YHR160C   | PEX18 | Peroxin required for targeting of peroxisomal matrix proteins containing PTS2; interacts with Pex7p; partially redundant with Pex21p                | 7.2  | 8.8  |
| YDR223W   | CRF1  | Transcriptional corepressor involved in repression of ribosomal protein (RP) gene transcription via the TOR signaling pathway which promotes        | 7.1  | 5.9  |
| YCL064C   | CHA1  | Catabolic L-serine (L-threonine) deaminase, catalyzes the degradation of both L-serine and L-threonine; required to use serine or threonine as the  | 7.1  |      |
| YDL244W   | THI13 | Protein involved in synthesis of the thiamine precursor hydroxymethylpyrimidine (HMP); member of a subtelomeric gene family                         | 7.1  | 7.9  |
| YLR149C   |       |                                                                                                                                                     | 7.0  | 9.3  |
| YNR002C   | ATO2  | Putative transmembrane protein involved in export of ammonia, a starvation signal that promotes cell death in aging colonies;                       | 6.9  | 4.7  |

|         |       |                                                                                                                                                 |     |      |
|---------|-------|-------------------------------------------------------------------------------------------------------------------------------------------------|-----|------|
| YDL085W | NDE2  | Mitochondrial external NADH dehydrogenase, catalyzes the oxidation of cytosolic NADH; Nde1p and Nde2p are involved in providing the             | 6.9 | 2.7  |
| YJL144W |       |                                                                                                                                                 | 6.9 | 18.6 |
| YDR124W |       |                                                                                                                                                 | 6.8 |      |
| YGR059W | SPR3  | Sporulation-specific homolog of the yeast CDC3/10/11/12 family of bud neck microfilament genes; septin protein involved in sporulation;         | 6.8 | 5.1  |
| YMR090W |       |                                                                                                                                                 | 6.7 | 2.4  |
| YGL156W | AMS1  | Vacuolar alpha mannosidase, involved in free oligosaccharide (fOS) degradation; delivered to the vacuole in a novel pathway separate from       | 6.6 | 18.8 |
| YOR120W | GCY1  | Putative NADP(+) coupled glycerol dehydrogenase, proposed to be involved in an alternative pathway for glycerol catabolism; member of the       | 6.6 | 3.1  |
| YJL048C | UBX6  | UBX (ubiquitin regulatory X) domain-containing protein that interacts with Cdc48p, transcription is repressed when cells are grown in media     | 6.6 | 3.7  |
| YMR085W |       |                                                                                                                                                 | 6.4 | 6.6  |
| YKR049C | FMP46 | Putative redox protein containing a thioredoxin fold; the authentic, non-tagged protein is detected in highly purified mitochondria in high-    | 6.4 | 6.3  |
| YDL048C | STP4  | Protein containing a Kruppel-type zinc-finger domain; has similarity to Stp1p, Stp2p, and Stp3p                                                 | 6.4 |      |
| YOL047C |       |                                                                                                                                                 | 6.2 | 12.6 |
| YMR322C | SNO4  | Possible chaperone and cysteine protease with similarity to E. coli Hsp31 and S. cerevisiae Hsp31p, Hsp33p, and Sno4p; member of the DJ-        | 6.2 | 6.4  |
| YNL274C | GOR1  | Glyoxylate reductase; null mutation results in increased biomass after diauxic shift; the authentic, non-tagged protein is detected in highly   | 6.1 |      |
| YJL108C | PRM10 | Pheromone-regulated protein, proposed to be involved in mating; predicted to have 5 transmembrane segments; induced by treatment with           | 6.0 | 10.5 |
| YMR196W |       |                                                                                                                                                 | 6.0 | 4.1  |
| YDR222W |       |                                                                                                                                                 | 5.8 | 2.7  |
| YIL160C | POT1  | 3-ketoacyl-CoA thiolase with broad chain length specificity, cleaves 3-ketoacyl-CoA into acyl-CoA and acetyl-CoA during beta-oxidation of fatty | 5.8 | 3.6  |
| YMR250W | GAD1  | Glutamate decarboxylase, converts glutamate into gamma-aminobutyric acid (GABA) during glutamate catabolism; involved in response to            | 5.8 | 4.5  |
| YPR015C |       |                                                                                                                                                 | 5.8 |      |
| YOR338W |       |                                                                                                                                                 | 5.8 | 6.0  |
| YKR046C | PET10 | Protein of unknown function that co-purifies with lipid particles; expression pattern suggests a role in respiratory growth; computational      | 5.7 | 3.9  |
| YEL057C |       |                                                                                                                                                 | 5.6 | 6.9  |
| YEL035C | UTR5  | Protein of unknown function; transcription may be regulated by Gcr1p; essential for growth under standard (aerobic) conditions but not under    | 5.6 |      |
| YHR097C |       |                                                                                                                                                 | 5.5 | 5.0  |
| YOR173W | DCS2  | Non-essential, stress induced regulatory protein containing a HIT (histidine triad) motif; modulates m7G-oligoribonucleotide metabolism;        | 5.5 | 6.0  |
| YLR121C | YPS3  | Aspartic protease, member of the yapsin family of proteases involved in cell wall growth and maintenance; attached to the plasma membrane via   | 5.5 | 18.2 |
| YHR138C |       |                                                                                                                                                 | 5.4 | 9.4  |
| YHR124W | NDT80 | Meiosis-specific transcription factor required for exit from pachytene and for full meiotic recombination; activates middle sporulation genes;  | 5.3 | 4.5  |
| YLR461W | PAU4  | Protein of unknown function, member of the seripauperin multigene family encoded mainly in subtelomeric regions; expression induced by          | 5.2 | 6.4  |
| YPL186C | UIP4  | Protein that interacts with Ulp1p, a Ubl (ubiquitin-like protein)-specific protease for Smt3p protein conjugates; detected in a phosphorylated  | 5.2 | 2.8  |
| YCR007C |       |                                                                                                                                                 | 5.2 | 9.1  |
| YLR312C |       |                                                                                                                                                 | 5.2 |      |

|           |       |                                                                                                                                                 |     |      |
|-----------|-------|-------------------------------------------------------------------------------------------------------------------------------------------------|-----|------|
| YHR033W   |       |                                                                                                                                                 | 5.2 |      |
| YPL230W   | USV1  | Putative transcription factor containing a C2H2 zinc finger; mutation affects transcriptional regulation of genes involved in growth on non-    | 5.1 | 2.9  |
| YJL153C   | INO1  | Inositol 1-phosphate synthase, involved in synthesis of inositol phosphates and inositol-containing phospholipids; transcription is             | 5.0 | 4.6  |
| YGR174W-A |       |                                                                                                                                                 | 5.0 |      |
| YGR144W   | THI4  | Thiazole synthase, catalyzes formation of a thiazole intermediate during thiamine biosynthesis; required for mitochondrial genome stability in  | 4.9 | 4.8  |
| YNL202W   | SPS19 | Peroxisomal 2,4-dienoyl-CoA reductase, auxiliary enzyme of fatty acid beta-oxidation; homodimeric enzyme required for growth and sporulation    | 4.9 | 4.4  |
| YER078W-A |       |                                                                                                                                                 | 4.9 |      |
| YPL017C   | IRC15 | Microtubule associated protein; regulates microtubule dynamics; required for accurate meiotic chromosome segregation; null mutant               | 4.8 | 2.1  |
| YDR218C   | SPR28 | Sporulation-specific homolog of the yeast CDC3/10/11/12 family of bud neck microfilament genes; meiotic septin expressed at high levels during  | 4.8 | 2.4  |
| YOR237W   | HES1  | Protein implicated in the regulation of ergosterol biosynthesis; one of a seven member gene family with a common essential function and non-    | 4.8 | 7.6  |
| YGR110W   | CLD1  | Mitochondrial cardiolipin-specific phospholipase; functions upstream of Taz1p to generate monolysocardiolipin; transcription increases upon     | 4.8 | 3.8  |
| YOL101C   | IZH4  | Membrane protein involved in zinc ion homeostasis, member of the four-protein IZH family, expression induced by fatty acids and altered zinc    | 4.7 | 22.7 |
| YGR087C   | PDC6  | Minor isoform of pyruvate decarboxylase, decarboxylates pyruvate to acetaldehyde, involved in amino acid catabolism; transcription is glucose-  | 4.7 | 2.9  |
| YJL016W   |       |                                                                                                                                                 | 4.6 | 2.1  |
| YFL030W   | AGX1  | Alanine:glyoxylate aminotransferase (AGT), catalyzes the synthesis of glycine from glyoxylate, which is one of three pathways for glycine       | 4.6 | 3.4  |
| YKL026C   | GPX1  | Phospholipid hydroperoxide glutathione peroxidase induced by glucose starvation that protects cells from phospholipid hydroperoxides and        | 4.6 | 2.9  |
| YCR021C   | HSP30 | Hydrophobic plasma membrane localized, stress-responsive protein that negatively regulates the H(+)-ATPase Pma1p; induced by heat shock,        | 4.6 |      |
| YGR149W   |       |                                                                                                                                                 | 4.6 | 3.6  |
| YML100W   | TSL1  | Large subunit of trehalose 6-phosphate synthase (Tps1p)/phosphatase (Tps2p) complex, which converts uridine-5'-diphosphoglucose and             | 4.5 | 5.9  |
| YDL024C   | DIA3  | Protein of unknown function, involved in invasive and pseudohyphal growth                                                                       | 4.5 | 2.7  |
| YOR178C   | GAC1  | Regulatory subunit for Glc7p type-1 protein phosphatase (PP1), tethers Glc7p to Gsy2p glycogen synthase, binds Hsf1p heat shock transcription   | 4.5 |      |
| YBL064C   | PRX1  | Mitochondrial peroxiredoxin (1-Cys Prx) with thioredoxin peroxidase activity, has a role in reduction of hydroperoxides; reactivation requires  | 4.4 | 3.4  |
| YMR096W   | SNZ1  | Protein involved in vitamin B6 biosynthesis; member of a stationary phase-induced gene family; coregulated with SNO1; interacts with Sno1p      | 4.4 | 2.9  |
| YDL204W   | RTN2  | Protein of unknown function; has similarity to mammalian reticulon proteins; member of the RTNLA (reticulon-like A) subfamily                   | 4.4 | 3.2  |
| YER184C   |       |                                                                                                                                                 | 4.3 | 5.4  |
| YMR206W   |       |                                                                                                                                                 | 4.3 |      |
| YGR201C   |       |                                                                                                                                                 | 4.3 |      |
| YGL183C   | MND1  | Protein required for recombination and meiotic nuclear division; forms a complex with Hop2p, which is involved in chromosome pairing and repair | 4.3 | 4.6  |
| YJL219W   | HXT9  | Putative hexose transporter that is nearly identical to Hxt11p, has similarity to major facilitator superfamily (MFS) transporters, expression  | 4.3 |      |
| YOR289W   |       |                                                                                                                                                 | 4.3 | 5.5  |
| YMR105C   | PGM2  | Phosphoglucomutase, catalyzes the conversion from glucose-1-phosphate to glucose-6-phosphate, which is a key step in hexose                     | 4.3 |      |
| YGR248W   | SOL4  | 6-phosphogluconolactonase with similarity to Sol3p                                                                                              | 4.2 |      |
| YOR152C   |       |                                                                                                                                                 | 4.2 | 4.8  |

|           |       |                                                                                                                                                      |     |      |
|-----------|-------|------------------------------------------------------------------------------------------------------------------------------------------------------|-----|------|
| YKR097W   | PCK1  | Phosphoenolpyruvate carboxykinase, key enzyme in gluconeogenesis, catalyzes early reaction in carbohydrate biosynthesis, glucose represses           | 4.2 | 2.4  |
| YHR137W   | ARO9  | Aromatic aminotransferase II, catalyzes the first step of tryptophan, phenylalanine, and tyrosine catabolism                                         | 4.2 |      |
| YMR095C   | SNO1  | Protein of unconfirmed function, involved in pyridoxine metabolism; expression is induced during stationary phase; forms a putative                  | 4.2 | 2.2  |
| YPL033C   | SRL4  | Protein of unknown function; involved in regulation of dNTP production; null mutant suppresses the lethality of lcd1 and rad53 mutations;            | 4.2 |      |
| YIL099W   | SGA1  | Intracellular sporulation-specific glucoamylase involved in glycogen degradation; induced during starvation of a/a diploids late in sporulation,     | 4.2 | 4.0  |
| YMR084W   |       |                                                                                                                                                      | 4.1 | 7.3  |
| YBR056W-A |       |                                                                                                                                                      | 4.1 |      |
| YNL092W   |       |                                                                                                                                                      | 4.1 | 4.6  |
| YOL162W   |       |                                                                                                                                                      | 4.1 |      |
| YNL195C   |       |                                                                                                                                                      | 4.0 | 2.1  |
| YBL078C   | ATG8  | Component of autophagosomes and Cvt vesicles; undergoes conjugation to phosphatidylethanolamine (PE); Atg8p-PE is anchored to                        | 4.0 | 5.1  |
| YDL110C   | TMA17 | Protein of unknown function that associates with ribosomes; heterozygous deletion demonstrated increases in chromosome instability                   | 4.0 | 4.0  |
| YMR040W   | YET2  | Protein of unknown function that may interact with ribosomes, based on co-purification experiments; homolog of human BAP31 protein                   | 4.0 | 4.9  |
| YFR023W   | PES4  | Poly(A) binding protein, suppressor of DNA polymerase epsilon mutation, similar to Mip6p                                                             | 4.0 |      |
| YHR140W   |       |                                                                                                                                                      | 4.0 | 2.9  |
| YLR099C   | ICT1  | Lysophosphatidic acid acyltransferase, responsible for enhanced phospholipid synthesis during organic solvent stress; null displays                  | 4.0 | 9.4  |
| YGL053W   | PRM8  | Pheromone-regulated protein with 2 predicted transmembrane segments and an FF sequence, a motif involved in COPII binding; forms a complex           | 4.0 | 3.8  |
| YMR034C   |       |                                                                                                                                                      | 4.0 | 7.2  |
| YHL021C   | AIM17 | Putative protein of unknown function; the authentic, non-tagged protein is detected in highly purified mitochondria in high-throughput studies; null | 3.9 | 4.1  |
| YDL169C   | UGX2  | Protein of unknown function, transcript accumulates in response to any combination of stress conditions                                              | 3.9 | 3.0  |
| YJL045W   |       |                                                                                                                                                      | 3.9 | 2.5  |
| YBR169C   | SSE2  | Member of the heat shock protein 70 (HSP70) family; may be involved in protein folding; localized to the cytoplasm; highly homologous to the heat    | 3.9 | 3.3  |
| YDR391C   |       |                                                                                                                                                      | 3.9 | 3.5  |
| YNL134C   |       |                                                                                                                                                      | 3.9 | 2.2  |
| YHR209W   | CRG1  | Putative S-adenosylmethionine-dependent methyltransferase; mediates cantharidin resistance                                                           | 3.8 | 18.0 |
| YLR327C   | TMA10 | Protein of unknown function that associates with ribosomes; putative homolog of the F1F0-ATPase synthase regulator Stf2p                             | 3.8 | 11.4 |
| YER158C   |       |                                                                                                                                                      | 3.8 |      |
| YBR006W   | UGA2  | Succinate semialdehyde dehydrogenase involved in the utilization of gamma-aminobutyrate (GABA) as a nitrogen source; part of the 4-                  | 3.8 | 2.2  |
| YJL161W   | FMP33 | Putative protein of unknown function; the authentic, non-tagged protein is detected in highly purified mitochondria in high-throughput studies       | 3.8 | 5.3  |
| YJL038C   | LOH1  | Protein of unknown function with proposed roles in maintenance of genome integrity and also in spore wall assembly; induced during                   | 3.8 |      |
| YHL048C-A |       |                                                                                                                                                      | 3.7 |      |
| YFR022W   | ROG3  | Protein that binds the ubiquitin ligase Rsp5p via its 2 PY motifs; has similarity to Rod1p; mutation suppresses the temperature sensitivity of       | 3.6 | 4.4  |
| YDR402C   | DIT2  | N-formyltyrosine oxidase, sporulation-specific microsomal enzyme involved in the production of N,N-bisformyl dityrosine required for spore           | 3.6 | 3.5  |

|           |       |                                                                                                                                                     |     |      |
|-----------|-------|-----------------------------------------------------------------------------------------------------------------------------------------------------|-----|------|
| YJR096W   |       |                                                                                                                                                     | 3.6 | 3.8  |
| YPR159C-A |       |                                                                                                                                                     | 3.6 |      |
| YOL131W   |       |                                                                                                                                                     | 3.6 | 3.1  |
| YBR033W   | EDS1  | Putative zinc cluster protein; YBR033W is not an essential gene                                                                                     | 3.6 | 5.8  |
| YLR080W   | EMP46 | Integral membrane component of endoplasmic reticulum-derived COPII-coated vesicles, which function in ER to Golgi transport                         | 3.6 | 3.9  |
| YJL103C   | GSM1  | Putative zinc cluster protein of unknown function; proposed to be involved in the regulation of energy metabolism, based on patterns of             | 3.6 | 2.7  |
| YMR271C   | URA10 | Minor orotate phosphoribosyltransferase (OPRTase) isozyme that catalyzes the fifth enzymatic step in the de novo biosynthesis of                    | 3.6 | 2.0  |
| YGR008C   | STF2  | Protein involved in regulation of the mitochondrial F1F0-ATP synthase; Stf1p and Stf2p may act as stabilizing factors that enhance inhibitory       | 3.6 | 3.2  |
| YLR194C   |       |                                                                                                                                                     | 3.5 | 10.1 |
| YEL073C   |       |                                                                                                                                                     | 3.5 |      |
| YHL022C   | SPO11 | Meiosis-specific protein that initiates meiotic recombination by catalyzing the formation of double-strand breaks in DNA via a transesterification  | 3.5 |      |
| YMR173W   | DDR48 | DNA damage-responsive protein, expression is increased in response to heat-shock stress or treatments that produce DNA lesions; contains            | 3.5 | 2.9  |
| YNL015W   | PBI2  | Cytosolic inhibitor of vacuolar proteinase B (PRB1), required for efficient vacuole inheritance; with thioredoxin forms protein complex LMA1, which | 3.5 | 2.7  |
| YOR385W   |       |                                                                                                                                                     | 3.5 | 5.0  |
| YDL181W   | INH1  | Protein that inhibits ATP hydrolysis by the F1F0-ATP synthase; inhibitory function is enhanced by stabilizing proteins Stf1p and Stf2p; has         | 3.5 |      |
| YMR081C   | ISF1  | Serine-rich, hydrophilic protein with similarity to Mbr1p; overexpression suppresses growth defects of hap2, hap3, and hap4 mutants; expression     | 3.5 |      |
| YMR008C   | PLB1  | Phospholipase B (lysophospholipase) involved in lipid metabolism, required for deacylation of phosphatidylcholine and                               | 3.4 | 7.3  |
| YDR055W   | PST1  | Cell wall protein that contains a putative GPI-attachment site; secreted by regenerating protoplasts; up-regulated by activation of the cell        | 3.4 | 6.0  |
| YOR062C   |       |                                                                                                                                                     | 3.4 | 2.3  |
| YOR036W   | PEP12 | Target membrane receptor (t-SNARE) for vesicular intermediates traveling between the Golgi apparatus and the vacuole; controls entry of             | 3.4 | 4.2  |
| YOL163W   |       |                                                                                                                                                     | 3.4 |      |
| YDR074W   | TPS2  | Phosphatase subunit of the trehalose-6-phosphate synthase/phosphatase complex, which synthesizes the storage                                        | 3.4 | 3.7  |
| YML131W   |       |                                                                                                                                                     | 3.4 | 2.2  |
| YNL014W   | HEF3  | Translational elongation factor EF-3; paralog of YEF3 and member of the ABC superfamily; stimulates EF-1 alpha-dependent binding of aminoacyl-      | 3.4 | 2.6  |
| YIL136W   | OM45  | Protein of unknown function, major constituent of the mitochondrial outer membrane; located on the outer (cytosolic) face of the outer membrane     | 3.4 | 2.9  |
| YJL163C   |       |                                                                                                                                                     | 3.3 | 3.0  |
| YPL088W   |       |                                                                                                                                                     | 3.3 | 10.8 |
| YOL002C   | IZH2  | Plasma membrane protein involved in zinc homeostasis and osmotin-induced apoptosis; transcription regulated by Zap1p, zinc and fatty acid           | 3.3 | 3.2  |
| YER106W   | MAM1  | Monopolin, kinetochore associated protein involved in chromosome attachment to meiotic spindle                                                      | 3.3 | 4.6  |
| YKL093W   | MBR1  | Protein involved in mitochondrial functions and stress response; overexpression suppresses growth defects of hap2, hap3, and hap4                   | 3.3 |      |
| YKL151C   |       |                                                                                                                                                     | 3.3 | 5.0  |
| YPL222W   | FMP40 | Putative protein of unknown function; proposed to be involved in responding to environmental stresses; the authentic, non-tagged protein            | 3.3 | 2.6  |
| YCR083W   | TRX3  | Mitochondrial thioredoxin, highly conserved oxidoreductase required to maintain the redox homeostasis of the cell, forms the mitochondrial          | 3.3 | 2.5  |

|           |        |                                                                                                                                                      |     |      |
|-----------|--------|------------------------------------------------------------------------------------------------------------------------------------------------------|-----|------|
| YGL015C   |        |                                                                                                                                                      | 3.3 | 3.0  |
| YPR184W   | GDB1   | Glycogen debranching enzyme containing glucanotransferase and alpha-1,6-amyloglucosidase activities, required for glycogen degradation;              | 3.3 |      |
| YOR065W   | CYT1   | Cytochrome c1, component of the mitochondrial respiratory chain; expression is regulated by the heme-activated, glucose-repressed                    | 3.3 |      |
| YLR297W   |        |                                                                                                                                                      | 3.3 |      |
| YFR017C   |        |                                                                                                                                                      | 3.2 |      |
| YLR307W   | CDA1   | Chitin deacetylase, together with Cda2p involved in the biosynthesis ascospore wall component, chitosan; required for proper rigidity of the         | 3.2 | 4.3  |
| YMR316W   | DIA1   | Protein of unknown function, involved in invasive and pseudohyphal growth; green fluorescent protein (GFP)-fusion protein localizes to the           | 3.2 | 8.1  |
| YJR115W   |        |                                                                                                                                                      | 3.2 |      |
| YMR136W   | GAT2   | Protein containing GATA family zinc finger motifs; similar to Gln3p and Dal80p; expression repressed by leucine                                      | 3.2 |      |
| YKL150W   | MCR1   | Mitochondrial NADH-cytochrome b5 reductase, involved in ergosterol biosynthesis                                                                      | 3.2 | 2.2  |
| YLR152C   |        |                                                                                                                                                      | 3.2 |      |
| YLR178C   | TFS1   | Protein that interacts with and inhibits carboxypeptidase Y and Ira2p; phosphatidylethanolamine-binding protein (PEBP) family member;                | 3.2 | 4.1  |
| YDR273W   | DON1   | Meiosis-specific component of the spindle pole body, part of the leading edge protein (LEP) coat, forms a ring-like structure at the leading edge of | 3.2 |      |
| YOR220W   | RCN2   | Protein of unknown function; green fluorescent protein (GFP)-fusion protein localizes to the cytoplasm and is induced in response to the DNA-        | 3.1 | 4.7  |
| YLR417W   | VPS36  | Component of the ESCRT-II complex; contains the GLUE (GRAM Like Ubiquitin binding in EAP45) domain which is involved in interactions with            | 3.1 | 2.5  |
| YDL037C   | BSC1   | Protein of unconfirmed function, similar to cell surface flocculin Muc1p; ORF exhibits genomic organization compatible with a translational          | 3.1 |      |
| YBR284W   |        |                                                                                                                                                      | 3.1 | 2.9  |
| YGR066C   |        |                                                                                                                                                      | 3.1 | 3.1  |
| YBR076W   | ECM8   | Non-essential protein of unknown function                                                                                                            | 3.1 | 2.9  |
| YLR174W   | IDP2   | Cytosolic NADP-specific isocitrate dehydrogenase, catalyzes oxidation of isocitrate to alpha-ketoglutarate; levels are elevated during growth on     | 3.1 |      |
| YKL221W   | MCH2   | Protein with similarity to mammalian monocarboxylate permeases, which are involved in transport of monocarboxylic acids across the plasma            | 3.1 | 3.1  |
| YJL082W   | IML2   | Protein of unknown function; the authentic, non-tagged protein is detected in highly purified mitochondria in high-throughput studies                | 3.1 | 3.1  |
| YER103W   | SSA4   | Heat shock protein that is highly induced upon stress; plays a role in SRP-dependent cotranslational protein-membrane targeting and                  | 3.1 | 2.7  |
| YBR203W   | COS111 | Protein required for resistance to the antifungal drug ciclopirox olamine; not related to the subtelomerically-encoded COS family; the authentic,    | 3.0 | 4.2  |
| YFR012W-A |        |                                                                                                                                                      | 3.0 | 2.1  |
| YJL107C   |        |                                                                                                                                                      | 3.0 | 12.8 |
| YPL054W   | LEE1   | Zinc-finger protein of unknown function                                                                                                              | 3.0 |      |
| YKL050C   |        |                                                                                                                                                      | 3.0 |      |
| YLL019C   | KNS1   | Nonessential putative protein kinase of unknown cellular role; member of the LAMMER family of protein kinases, which are serine/threonine            | 3.0 | 3.0  |
| YER035W   | EDC2   | RNA-binding protein, activates mRNA decapping directly by binding to the mRNA substrate and enhancing the activity of the decapping proteins         | 3.0 | 2.8  |
| YOR185C   | GSP2   | GTP binding protein (mammalian Ranp homolog) involved in the maintenance of nuclear organization, RNA processing and transport;                      | 3.0 | 4.3  |
| YCR018C   | SRD1   | Protein involved in the processing of pre-rRNA to mature rRNA; contains a C2/C2 zinc finger motif; srd1 mutation suppresses defects caused by        | 3.0 | 3.4  |
| YOL083W   | ATG34  | Receptor protein involved in selective autophagy during starvation; specifically involved in the transport of cargo protein alpha-mannosidase        | 3.0 | 4.0  |

|           |       |                                                                                                                                                     |     |     |
|-----------|-------|-----------------------------------------------------------------------------------------------------------------------------------------------------|-----|-----|
| YPR030W   | CSR2  | Nuclear protein proposed to regulate utilization of nonfermentable carbon sources and endocytosis of plasma membrane proteins; overproduction       | 3.0 | 2.5 |
| YKR061W   | KTR2  | Mannosyltransferase involved in N-linked protein glycosylation; member of the KRE2/MNT1 mannosyltransferase family                                  | 3.0 | 4.8 |
| YJR019C   | TES1  | Peroxisomal acyl-CoA thioesterase likely to be involved in fatty acid oxidation rather than fatty acid synthesis; conserved protein also found in   | 3.0 | 3.5 |
| YDR379C-A |       |                                                                                                                                                     | 2.9 | 4.2 |
| YOL132W   | GAS4  | 1,3-beta-glucanosyltransferase, involved with Gas2p in spore wall assembly; has similarity to Gas1p; localizes to the cell wall                     | 2.9 | 2.2 |
| YJL057C   | IKS1  | Putative serine/threonine kinase; expression is induced during mild heat stress; deletion mutants are hypersensitive to copper sulphate and         | 2.9 | 3.0 |
| YBR280C   | SAF1  | F-Box protein involved in proteasome-dependent degradation of Aah1p during entry of cells into quiescence; interacts with Skp1                      | 2.9 | 3.2 |
| YIL055C   |       |                                                                                                                                                     | 2.9 | 3.4 |
| YNL144C   |       |                                                                                                                                                     | 2.9 |     |
| YDL239C   | ADY3  | Protein required for spore wall formation, thought to mediate assembly of a Don1p-containing structure at the leading edge of the prospore          | 2.9 | 2.5 |
| YPR026W   | ATH1  | Acid trehalase required for utilization of extracellular trehalose                                                                                  | 2.9 | 2.1 |
| YOR107W   | RGS2  | Negative regulator of glucose-induced cAMP signaling; directly activates the GTPase activity of the heterotrimeric G protein alpha subunit Gpa2p    | 2.9 |     |
| YBR214W   | SDS24 | One of two <i>S. cerevisiae</i> homologs (Sds23p and Sds24p) of the <i>S. pombe</i> Sds23 protein, which is implicated in APC/cyclosome regulation; | 2.9 | 6.6 |
| YLR168C   | UPS2  | Mitochondrial intermembrane space protein involved in regulation of mitochondrial cardiolipin and phosphatidylethanolamine levels; null has         | 2.9 |     |
| YNL115C   |       |                                                                                                                                                     | 2.9 | 3.4 |
| YGL184C   | STR3  | Cystathionine beta-lyase, converts cystathionine into homocysteine                                                                                  | 2.9 |     |
| YGR138C   | TPO2  | Polyamine transport protein specific for spermine; localizes to the plasma membrane; transcription of TPO2 is regulated by Haa1p;                   | 2.9 |     |
| YGR127W   |       |                                                                                                                                                     | 2.9 | 2.0 |
| YNR019W   | ARE2  | Acyl-CoA:sterol acyltransferase, isozyme of Are1p; endoplasmic reticulum enzyme that contributes the major sterol esterification activity           | 2.8 | 4.6 |
| YDR009W   | GAL3  | Transcriptional regulator involved in activation of the GAL genes in response to galactose; forms a complex with Gal80p to relieve Gal80p           | 2.8 |     |
| YBR250W   | SPO23 | Protein of unknown function; associates with meiosis-specific protein Spo1p                                                                         | 2.8 |     |
| YKR053C   | YSR3  | Dihydro sphingosine 1-phosphate phosphatase, membrane protein involved in sphingolipid metabolism; has similarity to Lcb3p                          | 2.8 | 2.9 |
| YGR243W   | FMP43 | Putative protein of unknown function; expression regulated by osmotic and alkaline stresses; the authentic, non-tagged protein is detected in       | 2.8 | 3.8 |
| YDR001C   | NTH1  | Neutral trehalase, degrades trehalose; required for thermotolerance and may mediate resistance to other cellular stresses; may be                   | 2.8 | 3.6 |
| YDR247W   | VHS1  | Cytoplasmic serine/threonine protein kinase; identified as a high-copy suppressor of the synthetic lethality of a <i>sis2 sit4</i> double mutant,   | 2.8 |     |
| YHR004C   | NEM1  | Probable catalytic subunit of Nem1p-Spo7p phosphatase holoenzyme; regulates nuclear growth by controlling phospholipid biosynthesis,                | 2.8 | 2.3 |
| YLR251W   | SYM1  | Protein required for ethanol metabolism; induced by heat shock and localized to the inner mitochondrial membrane; homologous to                     | 2.8 | 3.0 |
| YMR009W   | ADI1  | Acireductone dioxygenase involved in the methionine salvage pathway; ortholog of human MTCBP-1; transcribed with YMR010W and regulated              | 2.8 | 2.4 |
| YCR010C   | ADY2  | Acetate transporter required for normal sporulation; phosphorylated in mitochondria                                                                 | 2.8 | 2.7 |
| YIR027C   | DAL1  | Allantoinase, converts allantoin to allantoate in the first step of allantoin degradation; expression sensitive to nitrogen catabolite repression   | 2.8 |     |
| YJL089W   | SIP4  | C6 zinc cluster transcriptional activator that binds to the carbon source-responsive element (CSRE) of gluconeogenic genes; involved in the         | 2.8 |     |
| YDR018C   |       |                                                                                                                                                     | 2.8 | 2.9 |
| YBR230C   | OM14  | Integral mitochondrial outer membrane protein; abundance is decreased in cells grown in glucose relative to other carbon sources; appears to        | 2.8 | 2.0 |



|           |       |                                                                                                                                                                     |     |     |
|-----------|-------|---------------------------------------------------------------------------------------------------------------------------------------------------------------------|-----|-----|
| YLL042C   | ATG10 | Conserved E2-like conjugating enzyme that mediates formation of the Atg12p-Atg5p conjugate, which is a critical step in autophagy                                   | 2.7 |     |
| YLR377C   | FBP1  | Fructose-1,6-bisphosphatase, key regulatory enzyme in the gluconeogenesis pathway, required for glucose metabolism; undergoes                                       | 2.7 |     |
| YER053C   | PIC2  | Mitochondrial phosphate carrier, imports inorganic phosphate into mitochondria; functionally redundant with Mir1p but less abundant than                            | 2.7 |     |
| YOR019W   |       |                                                                                                                                                                     | 2.7 | 2.9 |
| YDR171W   | HSP42 | Small heat shock protein (sHSP) with chaperone activity; forms barrel-shaped oligomers that suppress unfolded protein aggregation; involved                         | 2.7 | 4.5 |
| YDL130W-A | STF1  | Protein involved in regulation of the mitochondrial F1F0-ATP synthase; Stf1p and Stf2p may act as stabilizing factors that enhance inhibitory                       | 2.7 | 2.9 |
| YDR059C   | UBC5  | Ubiquitin-conjugating enzyme that mediates selective degradation of short-lived, abnormal, or excess proteins, including histone H3; central                        | 2.7 | 2.3 |
| YER054C   | GIP2  | Putative regulatory subunit of the protein phosphatase Glc7p, involved in glycogen metabolism; contains a conserved motif (GVNK motif) that is                      | 2.7 |     |
| YBR056W   |       |                                                                                                                                                                     | 2.7 | 5.2 |
| YHR048W   | YHK8  | Presumed antiporter of the DHA1 family of multidrug resistance transporters; contains 12 predicted transmembrane spans; expression of                               | 2.7 |     |
| YAL037W   |       |                                                                                                                                                                     | 2.7 |     |
| YDR178W   | SDH4  | Membrane anchor subunit of succinate dehydrogenase (Sdh1p, Sdh2p, Sdh3p, Sdh4p), which couples the oxidation of succinate to the transfer                           | 2.7 |     |
| YCR061W   |       |                                                                                                                                                                     | 2.7 | 3.1 |
| YAL008W   | FUN14 | Mitochondrial protein of unknown function                                                                                                                           | 2.7 | 3.3 |
| YIL045W   | PIG2  | Putative type-1 protein phosphatase targeting subunit that tethers Glc7p type-1 protein phosphatase to Gsy2p glycogen synthase                                      | 2.7 |     |
| YER130C   |       |                                                                                                                                                                     | 2.6 | 2.3 |
| YPL247C   |       |                                                                                                                                                                     | 2.6 |     |
| YBR066C   | NRG2  | Transcriptional repressor that mediates glucose repression and negatively regulates filamentous growth; has similarity to Nrg1p                                     | 2.6 |     |
| YGL006W   | PMC1  | Vacuolar Ca <sup>2+</sup> ATPase involved in depleting cytosol of Ca <sup>2+</sup> ions; prevents growth inhibition by activation of calcineurin in the presence of | 2.6 | 3.1 |
| YEL039C   | CYC7  | Cytochrome c isoform 2, expressed under hypoxic conditions; electron carrier of the mitochondrial intermembrane space that transfers electrons                      | 2.6 |     |
| YDR358W   | GGA1  | Golgi-localized protein with homology to gamma-adaptin, interacts with and regulates Arf1p and Arf2p in a GTP-dependent manner in order to                          | 2.6 | 3.3 |
| YMR094W   | CTF13 | Subunit of the CBF3 complex, which binds to the CDE III element of centromeres, bending the DNA upon binding, and may be involved in                                | 2.6 |     |
| YLR270W   | DCS1  | Non-essential hydrolase involved in mRNA decapping, may function in a feedback mechanism to regulate deadenylation, contains                                        | 2.6 | 2.7 |
| YKR009C   | FOX2  | Multifunctional enzyme of the peroxisomal fatty acid beta-oxidation pathway; has 3-hydroxyacyl-CoA dehydrogenase and enoyl-CoA                                      | 2.6 | 2.0 |
| YAL034C   | FUN19 | Non-essential protein of unknown function; expression induced in response to heat stress                                                                            | 2.6 | 2.3 |
| YLR162W-A | RRT15 | Putative protein of unknown function identified by fungal homology comparisons and RT-PCR; identified in a screen for mutants with                                  | 2.6 | 2.8 |
| YFR032C   | RRT5  | Putative protein of unknown function; non-essential gene identified in a screen for mutants with increased levels of rDNA transcription;                            | 2.6 |     |
| YCL038C   | ATG22 | Vacuolar integral membrane protein required for efflux of amino acids during autophagic body breakdown in the vacuole; null mutation causes                         | 2.6 | 3.2 |
| YOR020W-A |       |                                                                                                                                                                     | 2.6 | 2.1 |
| YHR106W   | TRR2  | Mitochondrial thioredoxin reductase involved in protection against oxidative stress, required with Glr1p to maintain the redox state of Trx3p;                      | 2.6 |     |
| YEL060C   | PRB1  | Vacuolar proteinase B (yscB), a serine protease of the subtilisin family; involved in protein degradation in the vacuole and required for full protein              | 2.6 | 5.5 |
| YDL020C   | RPN4  | Transcription factor that stimulates expression of proteasome genes; Rpn4p levels are in turn regulated by the 26S proteasome in a negative                         | 2.6 | 2.9 |
| YNL128W   | TEP1  | Homolog of human tumor suppressor gene PTEN/MMAC1/TEP1 that has lipid phosphatase activity and is linked to the phosphatidylinositol                                | 2.6 |     |

|           |       |                                                                                                                                                         |     |     |
|-----------|-------|---------------------------------------------------------------------------------------------------------------------------------------------------------|-----|-----|
| YLR414C   | PUN1  | Putative protein of unknown function; localizes to bud and cytoplasm; co-localizes with Sur7p in punctate patches in the plasma membrane; null          | 2.6 | 3.2 |
| YER179W   | DMC1  | Meiosis-specific protein required for repair of double-strand breaks and pairing between homologous chromosomes; homolog of Rad51p and the              | 2.6 | 3.7 |
| YBL043W   | ECM13 | Non-essential protein of unknown function; induced by treatment with 8-methoxypsoralen and UVA irradiation                                              | 2.5 |     |
| YKL159C   | RCN1  | Protein involved in calcineurin regulation during calcium signaling; has similarity to H. sapiens DSCR1 which is found in the Down Syndrome             | 2.5 | 5.2 |
| YER096W   | SHC1  | Sporulation-specific activator of Chs3p (chitin synthase III), required for the synthesis of the chitosan layer of ascospores; has similarity to Skt5p, | 2.5 |     |
| YDR058C   | TGL2  | Triacylglycerol lipase that is localized to the mitochondria; has lipolytic activity towards triacylglycerols and diacylglycerols when expressed in E.  | 2.5 | 3.5 |
| YOL108C   | INO4  | Transcription factor required for derepression of inositol-choline-regulated genes involved in phospholipid synthesis; forms a complex,                 | 2.5 |     |
| YGL038C   | OCH1  | Mannosyltransferase of the cis-Golgi apparatus, initiates the polymannose outer chain elongation of N-linked oligosaccharides of                        | 2.5 | 2.5 |
| YBL093C   | ROX3  | Subunit of the RNA polymerase II mediator complex; associates with core polymerase subunits to form the RNA polymerase II holoenzyme                    | 2.5 | 3.4 |
| YJL185C   |       |                                                                                                                                                         | 2.5 | 2.0 |
| YNL200C   |       |                                                                                                                                                         | 2.5 |     |
| YLL064C   | PAU18 | Protein of unknown function, member of the seripauperin multigene family encoded mainly in subtelomeric regions; identical to Pau6p ///                 | 2.5 | 4.8 |
| YMR114C   |       |                                                                                                                                                         | 2.5 | 2.3 |
| YER015W   | FAA2  | Medium chain fatty acyl-CoA synthetase, activates imported fatty acids; accepts a wide range of fatty acid chain lengths with a preference for          | 2.5 | 2.2 |
| YDR317W   | HIM1  | Protein of unknown function involved in DNA repair                                                                                                      | 2.5 | 2.6 |
| YFL055W   | AGP3  | Low-affinity amino acid permease, may act to supply the cell with amino acids as nitrogen source in nitrogen-poor conditions; transcription is          | 2.5 |     |
| YOR161C-C |       |                                                                                                                                                         | 2.5 |     |
| YOR348C   | PUT4  | Proline permease, required for high-affinity transport of proline; also transports the toxic proline analog azetidine-2-carboxylate (AzC); PUT4         | 2.5 |     |
| YPL123C   | RNY1  | Vacuolar RNase of the T(2) family, relocalizes to the cytosol where it cleaves tRNAs upon oxidative or stationary phase stress; promotes                | 2.5 | 2.6 |
| YBR269C   | FMP21 | Putative protein of unknown function; the authentic, non-tagged protein is detected in highly purified mitochondria in high-throughput studies          | 2.5 | 2.3 |
| YHR001W-A | QCR10 | Subunit of the ubiquinol-cytochrome c oxidoreductase complex which includes Cobp, Rip1p, Cyt1p, Cor1p, Qcr2p, Qcr6p, Qcr7p, Qcr8p,                      | 2.5 |     |
| YMR053C   | STB2  | Protein that interacts with Sin3p in a two-hybrid assay and is part of a large protein complex with Sin3p and Stb1p                                     | 2.5 | 5.1 |
| YNR075W   | COS10 | Protein of unknown function, member of the DUP380 subfamily of conserved, often subtelomerically-encoded proteins                                       | 2.5 | 6.0 |
| YDR123C   | INO2  | Component of the heteromeric Ino2p/Ino4p basic helix-loop-helix transcription activator that binds inositol/choline-responsive elements                 | 2.5 | 2.1 |
| YGL051W   | MST27 | Putative integral membrane protein, involved in vesicle formation; forms complex with Mst28p; member of DUP240 gene family; binds COPI and              | 2.5 | 2.5 |
| YOR328W   | PDR10 | ATP-binding cassette (ABC) transporter, multidrug transporter involved in the pleiotropic drug resistance network; regulated by Pdr1p and Pdr3p         | 2.5 |     |
| YLL039C   | UBI4  | Ubiquitin, becomes conjugated to proteins, marking them for selective degradation via the ubiquitin-26S proteasome system; essential for the            | 2.5 | 6.3 |
| YNL024C   |       |                                                                                                                                                         | 2.5 | 2.7 |
| YMR323W   | ERR3  | Protein of unknown function, has similarity to enolases ///                                                                                             | 2.5 | 3.9 |
| YOR177C   | MPC54 | Component of the meiotic outer plaque, a membrane-organizing center which is assembled on the cytoplasmic face of the spindle pole body                 | 2.5 | 2.3 |
| YDL079C   | MRK1  | Glycogen synthase kinase 3 (GSK-3) homolog; one of four GSK-3 homologs in S. cerevisiae that function to activate Msn2p-dependent                       | 2.5 |     |
| YOL048C   | RRT8  | Putative protein of unknown function; identified in a screen for mutants with increased levels of rDNA transcription; green fluorescent protein         | 2.5 | 2.7 |
| YOL110W   | SHR5  | Subunit of a palmitoyltransferase, composed of Shr5p and Erf2p, that adds a palmitoyl lipid moiety to heterolipidated substrates such as Ras1p          | 2.5 |     |

|         |       |                                                                                                                                                       |     |     |
|---------|-------|-------------------------------------------------------------------------------------------------------------------------------------------------------|-----|-----|
| YGR250C |       |                                                                                                                                                       | 2.4 |     |
| YPL170W | DAP1  | Heme-binding protein involved in regulation of cytochrome P450 protein Erg11p; damage response protein, related to mammalian membrane                 | 2.4 | 3.8 |
| YEL011W | GLC3  | Glycogen branching enzyme, involved in glycogen accumulation; green fluorescent protein (GFP)-fusion protein localizes to the cytoplasm in a          | 2.4 |     |
| YOL016C | CMK2  | Calmodulin-dependent protein kinase; may play a role in stress response, many CA <sup>++</sup> /calmodulin dependent phosphorylation                  | 2.4 | 5.9 |
| YML118W | NGL3  | Putative endonuclease, has a domain similar to a magnesium-dependent endonuclease motif in mRNA deadenylase Ccr4p; similar to Ng11p and               | 2.4 | 3.3 |
| YLR107W | REX3  | RNA exonuclease; required for maturation of the RNA component of RNase MRP; functions redundantly with Rnh70p and Rex2p in                            | 2.4 | 3.2 |
| YDL027C |       |                                                                                                                                                       | 2.4 | 2.6 |
| YOL024W |       |                                                                                                                                                       | 2.4 |     |
| YGL157W | ARI1  | NADPH-dependent aldehyde reductase, utilizes aromatic and alicyclic aldehyde substrates; member of the short-chain                                    | 2.4 | 3.8 |
| YOL155C | HPF1  | Haze-protective mannoprotein that reduces the particle size of aggregated proteins in white wines                                                     | 2.4 | 3.2 |
| YMR181C |       |                                                                                                                                                       | 2.4 | 3.8 |
| YHR015W | MIP6  | Putative RNA-binding protein, interacts with Mex67p, which is a component of the nuclear pore involved in nuclear mRNA export                         | 2.4 | 2.1 |
| YKL051W | SFK1  | Plasma membrane protein that may act together with or upstream of Stt4p to generate normal levels of the essential phospholipid PI4P, at              | 2.4 | 2.0 |
| YDL057W |       |                                                                                                                                                       | 2.4 | 2.7 |
| YKR098C | UBP11 | Ubiquitin-specific protease that cleaves ubiquitin from ubiquitinated proteins                                                                        | 2.4 | 3.0 |
| YJL141C | YAK1  | Serine-threonine protein kinase that is part of a glucose-sensing system involved in growth control in response to glucose availability; translocates | 2.4 |     |
| YJL027C |       |                                                                                                                                                       | 2.4 |     |
| YKL071W |       |                                                                                                                                                       | 2.4 |     |
| YGL081W |       |                                                                                                                                                       | 2.4 |     |
| YGL166W | CUP2  | Copper-binding transcription factor; activates transcription of the metallothionein genes CUP1-1 and CUP1-2 in response to elevated                   | 2.4 | 3.4 |
| YDR258C | HSP78 | Oligomeric mitochondrial matrix chaperone that cooperates with Ssc1p in mitochondrial thermotolerance after heat shock; able to prevent the           | 2.4 | 3.9 |
| YJL066C | MPM1  | Mitochondrial membrane protein of unknown function, contains no hydrophobic stretches                                                                 | 2.4 | 3.1 |
| YCL049C |       |                                                                                                                                                       | 2.3 | 2.9 |
| YHR092C | HXT4  | High-affinity glucose transporter of the major facilitator superfamily, expression is induced by low levels of glucose and repressed by high          | 2.3 |     |
| YDR072C | IPT1  | Inositolphosphotransferase, involved in synthesis of mannanose-(inositol-P)2-ceramide (M(IP)2C), the most abundant sphingolipid; can mutate to        | 2.3 | 2.9 |
| YOR052C |       |                                                                                                                                                       | 2.3 | 2.0 |
| YPL130W | SPO19 | Meiosis-specific prospore protein; required to produce bending force necessary for proper assembly of the prospore membrane during                    | 2.3 |     |
| YIR039C | YPS6  | Putative GPI-anchored aspartic protease, member of the yapsin family of proteases involved in cell wall growth and maintenance                        | 2.3 | 7.5 |
| YOR018W | ROD1  | Membrane protein that binds the ubiquitin ligase Rsp5p via its 2 PY motifs; overexpression confers resistance to the GST substrate o-                 | 2.3 | 2.2 |
| YGL144C | ROG1  | Protein with putative serine active lipase domain                                                                                                     | 2.3 | 2.1 |
| YKL148C | SDH1  | Flavoprotein subunit of succinate dehydrogenase (Sdh1p, Sdh2p, Sdh3p, Sdh4p), which couples the oxidation of succinate to the transfer                | 2.3 |     |
| YBR105C | VID24 | Peripheral membrane protein located at Vid (vacuole import and degradation) vesicles; regulates fructose-1,6-bisphosphatase (FBPase)                  | 2.3 |     |
| YPR049C | ATG11 | Adapter protein for pexophagy and the cytoplasm-to-vacuole targeting (Cvt) pathway; directs receptor-bound cargo to the phagophore assembly           | 2.3 |     |

|           |        |                                                                                                                                                       |     |     |
|-----------|--------|-------------------------------------------------------------------------------------------------------------------------------------------------------|-----|-----|
| YBR053C   |        |                                                                                                                                                       | 2.3 | 3.3 |
| YLR173W   |        |                                                                                                                                                       | 2.3 |     |
| YLL026W   | HSP104 | Heat shock protein that cooperates with Ydj1p (Hsp40) and Ssa1p (Hsp70) to refold and reactivate previously denatured, aggregated                     | 2.3 | 3.9 |
| YPR134W   | MSS18  | Nuclear encoded protein needed for efficient splicing of mitochondrial COX1 $\alpha$ 5beta intron; mss18 mutations block cleavage of 5' exon - intron | 2.3 | 2.3 |
| YDR436W   | PPZ2   | Serine/threonine protein phosphatase Z, isoform of Ppz1p; involved in regulation of potassium transport, which affects osmotic stability, cell        | 2.3 | 2.3 |
| YOR349W   | CIN1   | Tubulin folding factor D involved in beta-tubulin (Tub2p) folding; isolated as mutant with increased chromosome loss and sensitivity to benomyl       | 2.3 |     |
| YJL101C   | GSH1   | Gamma glutamylcysteine synthetase catalyzes the first step in glutathione (GSH) biosynthesis; expression induced by oxidants,                         | 2.3 |     |
| YDR533C   | HSP31  | Possible chaperone and cysteine protease with similarity to E. coli Hsp31; member of the DJ-1/ThiJ/PfpI superfamily, which includes human             | 2.3 |     |
| YGR249W   | MGA1   | Protein similar to heat shock transcription factor; multicopy suppressor of pseudohyphal growth defects of ammonium permease mutants                  | 2.3 | 3.2 |
| YFL020C   | PAU5   | Member of the seripauperin multigene family encoded mainly in subtelomeric regions; induced during alcoholic fermentation; induced by                 | 2.3 |     |
| YER067W   | RG11   | Putative protein of unknown function; green fluorescent protein (GFP)-fusion protein localizes to the cytoplasm and nucleus; YER067W is not           | 2.3 |     |
| YGL104C   | VPS73  | Mitochondrial protein; mutation affects vacuolar protein sorting; putative transporter; member of the sugar porter family                             | 2.3 | 3.2 |
| YHR202W   |        |                                                                                                                                                       | 2.3 |     |
| YHR157W   | REC104 | Protein involved in early stages of meiotic recombination; required for meiotic crossing over; forms a complex with Rec102p and Spo11p                | 2.3 |     |
| YDR182W-A |        |                                                                                                                                                       | 2.3 |     |
| YLL060C   | GTT2   | Glutathione S-transferase capable of homodimerization; functional overlap with Gtt2p, Grx1p, and Grx2p                                                | 2.3 |     |
| YOL011W   | PLB3   | Phospholipase B (lysophospholipase) involved in phospholipid metabolism; hydrolyzes phosphatidylinositol and phosphatidylserine and                   | 2.3 | 2.0 |
| YJR025C   | BNA1   | 3-hydroxyanthranilic acid dioxygenase, required for the de novo biosynthesis of NAD from tryptophan via kynurenine; expression                        | 2.2 |     |
| YIR029W   | DAL2   | Allantoicase, converts allantoate to urea and ureidoglycolate in the second step of allantoin degradation; expression sensitive to nitrogen           | 2.2 |     |
| YNL036W   | NCE103 | Carbonic anhydrase; poorly transcribed under aerobic conditions and at an undetectable level under anaerobic conditions; involved in non-             | 2.2 | 3.0 |
| YJR142W   |        |                                                                                                                                                       | 2.2 | 2.9 |
| YML042W   | CAT2   | Carnitine acetyl-CoA transferase present in both mitochondria and peroxisomes, transfers activated acetyl groups to carnitine to form                 | 2.2 | 2.4 |
| YDR125C   | ECM18  | Protein of unknown function, similar to Rlp24p                                                                                                        | 2.2 |     |
| YJR119C   | JHD2   | JmjC domain family histone demethylase specific for H3-K4 (histone H3 Lys4); removes methyl groups specifically added by Set1p                        | 2.2 |     |
| YDL107W   | MSS2   | Peripherally bound inner membrane protein of the mitochondrial matrix involved in membrane insertion of C-terminus of Cox2p, interacts                | 2.2 |     |
| YDR492W   | IZH1   | Membrane protein involved in zinc ion homeostasis, member of the four-protein IZH family; transcription is regulated directly by Zap1p,               | 2.2 |     |
| YPL042C   | SSN3   | Cyclin-dependent protein kinase, component of RNA polymerase II holoenzyme; involved in phosphorylation of the RNA polymerase II C-                   | 2.2 |     |
| YNL192W   | CHS1   | Chitin synthase I, requires activation from zymogenic form in order to catalyze the transfer of N-acetylglucosamine (GlcNAc) to chitin; required      | 2.2 | 4.2 |
| YDL234C   | GYP7   | GTPase-activating protein for yeast Rab family members including: Ypt7p (most effective), Ypt1p, Ypt31p, and Ypt32p (in vitro); involved in           | 2.2 | 3.9 |
| YFR053C   | HXK1   | Hexokinase isoenzyme 1, a cytosolic protein that catalyzes phosphorylation of glucose during glucose metabolism; expression is                        | 2.2 |     |
| YGR126W   |        |                                                                                                                                                       | 2.2 | 3.2 |
| YCR091W   | KIN82  | Putative serine/threonine protein kinase implicated in the regulation of phospholipid asymmetry through the activation of phospholipid                | 2.2 | 2.0 |
| YGL045W   | RIM8   | Protein involved in proteolytic activation of Rim101p in response to alkaline pH; interacts with ESCRT-1 subunits Stp22p and Vps28p;                  | 2.2 | 2.3 |

|           |        |                                                                                                                                                      |     |     |
|-----------|--------|------------------------------------------------------------------------------------------------------------------------------------------------------|-----|-----|
| YLR004C   | THI73  | Putative plasma membrane permease proposed to be involved in carboxylic acid uptake and repressed by thiamine; substrate of                          | 2.2 |     |
| YLL041C   | SDH2   | Iron-sulfur protein subunit of succinate dehydrogenase (Sdh1p, Sdh2p, Sdh3p, Sdh4p), which couples the oxidation of succinate to the transfer        | 2.2 |     |
| YNL012W   | SPO1   | Meiosis-specific prospore protein; required for meiotic spindle pole body duplication and separation; required to produce bending force necessary    | 2.2 | 2.8 |
| YEL020C   |        |                                                                                                                                                      | 2.2 | 2.3 |
| YDR403W   | DIT1   | Sporulation-specific enzyme required for spore wall maturation, involved in the production of a soluble LL-dityrosine-containing precursor of the    | 2.2 | 2.3 |
| YBR045C   | GIP1   | Meiosis-specific regulatory subunit of the Glc7p protein phosphatase, regulates spore wall formation and septin organization, required for           | 2.2 | 2.6 |
| YDR490C   | PKH1   | Serine/threonine protein kinase involved in sphingolipid-mediated signaling pathway that controls endocytosis; activates Ypk1p and Ykr2p,            | 2.2 | 2.1 |
| YBR022W   | POA1   | Phosphatase that is highly specific for ADP-ribose 1"-phosphate, a tRNA splicing metabolite; may have a role in regulation of tRNA splicing          | 2.2 |     |
| YDR085C   | AFR1   | Protein required for pheromone-induced projection (shmoo) formation; regulates septin architecture during mating; has an RVXF motif that             | 2.2 | 4.7 |
| YDR530C   | APA2   | Diadenosine 5',5"-P1,P4-tetraphosphate phosphorylase II (AP4A phosphorylase), involved in catabolism of bis(5'-nucleosidyl)                          | 2.2 | 2.1 |
| YAL028W   | FRT2   | Tail-anchored endoplasmic reticulum membrane protein, interacts with homolog Frt1p but is not a substrate of calcineurin (unlike Frt1p),             | 2.2 | 2.4 |
| YMR165C   | PAH1   | Mg <sup>2+</sup> -dependent phosphatidate (PA) phosphatase, catalyzes the dephosphorylation of PA to yield diacylglycerol and                        | 2.2 | 2.3 |
| YKL183C-A |        |                                                                                                                                                      | 2.2 | 3.0 |
| YOR274W   | MOD5   | Delta 2-isopentenyl pyrophosphate:tRNA isopentenyl transferase, required for biosynthesis of the modified base isopentenyladenosine in               | 2.2 | 2.3 |
| YER144C   | UBP5   | Putative ubiquitin-specific protease, closest paralog of Doa4p but has no functional overlap; concentrates at the bud neck                           | 2.2 | 2.7 |
| YLR460C   |        |                                                                                                                                                      | 2.2 |     |
| YOR176W   | HEM15  | Ferrochelatase, a mitochondrial inner membrane protein, catalyzes the insertion of ferrous iron into protoporphyrin IX, the eighth and final step in | 2.2 | 2.0 |
| YDL049C   | KNH1   | Protein with similarity to Kre9p, which is involved in cell wall beta 1,6-glucan synthesis; overproduction suppresses growth defects of a kre9       | 2.2 |     |
| YLR307C-A |        |                                                                                                                                                      | 2.1 | 2.4 |
| YOL107W   |        |                                                                                                                                                      | 2.1 | 2.7 |
| YPR191W   | QCR2   | Subunit 2 of the ubiquinol cytochrome-c reductase complex, which is a component of the mitochondrial inner membrane electron transport               | 2.1 |     |
| YLR329W   | REC102 | Protein involved in early stages of meiotic recombination; required for chromosome synapsis; forms a complex with Rec104p and Spo11p                 | 2.1 |     |
| YAR027W   | UIP3   | Putative integral membrane protein of unknown function; interacts with Ulp1p at the nuclear periphery; member of DUP240 gene family                  | 2.1 | 2.7 |
| YGL254W   | FZF1   | Transcription factor involved in sulfite metabolism, sole identified regulatory target is SSU1, overexpression suppresses sulfite-sensitivity        | 2.1 |     |
| YDR277C   | MTH1   | Negative regulator of the glucose-sensing signal transduction pathway, required for repression of transcription by Rgt1p; interacts with Rgt1p       | 2.1 |     |
| YMR280C   | CAT8   | Zinc cluster transcriptional activator necessary for derepression of a variety of genes under non-fermentative growth conditions, active after       | 2.1 |     |
| YKL091C   |        |                                                                                                                                                      | 2.1 | 2.6 |
| YGR237C   |        |                                                                                                                                                      | 2.1 | 3.0 |
| YJL070C   |        |                                                                                                                                                      | 2.1 |     |
| YDR275W   | BSC2   | Protein of unknown function, ORF exhibits genomic organization compatible with a translational readthrough-dependent mode of                         | 2.1 | 2.6 |
| YHR067W   | HTD2   | Mitochondrial 3-hydroxyacyl-thioester dehydratase involved in fatty acid biosynthesis, required for respiratory growth and for normal mitochondrial  | 2.1 |     |
| YIR033W   | MGA2   | ER membrane protein involved in regulation of OLE1 transcription, acts with homolog Spt23p; inactive ER form dimerizes and one subunit is            | 2.1 | 3.7 |
| YPL148C   | PPT2   | Phosphopantetheine:protein transferase (PPTase), activates mitochondrial acyl carrier protein (Acp1p) by phosphopantetheinylation                    | 2.1 |     |

|           |       |                                                                                                                                                          |     |      |
|-----------|-------|----------------------------------------------------------------------------------------------------------------------------------------------------------|-----|------|
| YFL041W-A |       |                                                                                                                                                          | 2.1 | 3.5  |
| YGR035C   |       |                                                                                                                                                          | 2.1 |      |
| YOR374W   | ALD4  | Mitochondrial aldehyde dehydrogenase, required for growth on ethanol and conversion of acetaldehyde to acetate; phosphorylated; activity is K+           | 2.1 |      |
| YGR036C   | CAX4  | Dolichyl pyrophosphate (Dol-P-P) phosphatase with a lumenally oriented active site in the ER, cleaves the anhydride linkage in Dol-P-P, required         | 2.1 | 2.2  |
| YMR020W   | FMS1  | Polyamine oxidase, converts spermine to spermidine, which is required for the essential hypusination modification of translation factor eIF-5A;          | 2.1 | 3.6  |
| YDR030C   | RAD28 | Protein involved in DNA repair, related to the human CSA protein that is involved in transcription-coupled repair nucleotide excision repair             | 2.1 | 2.5  |
| YGR161C   | RTS3  | Putative component of the protein phosphatase type 2A complex                                                                                            | 2.1 | 3.4  |
| YGR183C   | QCR9  | Subunit 9 of the ubiquinol cytochrome-c reductase complex, which is a component of the mitochondrial inner membrane electron transport                   | 2.1 |      |
| YMR140W   | SIP5  | Protein of unknown function; interacts with both the Reg1p/Glc7p phosphatase and the Snf1p kinase                                                        | 2.1 | 2.8  |
| YLR345W   |       |                                                                                                                                                          | 2.1 | 2.4  |
| YOL015W   | IRC10 | Putative protein of unknown function; null mutant displays increased levels of spontaneous Rad52p foci                                                   | 2.1 | 2.1  |
| YKL086W   | SRX1  | Sulfiredoxin, contributes to oxidative stress resistance by reducing cysteine-sulfinic acid groups in the peroxiredoxin Tsa1p, which is formed           | 2.1 | 3.3  |
| YPR093C   | ASR1  | Ubiquitin ligase that modifies and regulates RNA Pol II; involved in a putative alcohol-responsive signaling pathway; accumulates in the                 | 2.0 |      |
| YGL227W   | VID30 | Protein involved in proteasome-dependent catabolite degradation of fructose-1,6-bisphosphatase (FBPase); binds FBPase; shifts the balance                | 2.0 | 2.3  |
| YJR152W   | DAL5  | Allantoate permease; ureidosuccinate permease; also transports dipeptides, though with lower affinity than for allantoate and                            | 2.0 |      |
| YNL009W   | IDP3  | Peroxisomal NADP-dependent isocitrate dehydrogenase, catalyzes oxidation of isocitrate to alpha-ketoglutarate with the formation of                      | 2.0 |      |
| YFR030W   | MET10 | Subunit alpha of assimilatory sulfite reductase, which converts sulfite into sulfide                                                                     | 2.0 |      |
| YMR030W   | RSF1  | Protein required for respiratory growth; localized to both the nucleus and mitochondrion; may interact with transcription factors to mediate the         | 2.0 |      |
| YER062C   | HOR2  | One of two redundant DL-glycerol-3-phosphatases (RHR2/GPP1 encodes the other) involved in glycerol biosynthesis; induced in response                     | 2.0 | 4.6  |
| YIL071C   | PCI8  | Possible shared subunit of Cop9 signalosome (CSN) and eIF3, binds eIF3b subunit Prt1p, has possible dual functions in transcriptional and                | 2.0 |      |
| YDR042C   |       |                                                                                                                                                          | 2.0 |      |
| YFL062W   | COS4  | Protein of unknown function, member of the DUP380 subfamily of conserved, often subtelomerically-encoded proteins /// Protein of                         | 2.0 | 2.0  |
| YHL010C   | ETP1  | Putative protein of unknown function that is required for growth on ethanol; contains a zinc finger region and has homology to human                     | 2.0 |      |
| YDR255C   | RMD5  | Conserved protein that has an E3-like ubiquitin ligase activity necessary for polyubiquitination and degradation of the gluconeogenic enzyme             | 2.0 | 2.7  |
| YLR132C   |       |                                                                                                                                                          | 2.0 |      |
| YHL009W-B |       |                                                                                                                                                          | 2.0 |      |
| YDL149W   | ATG9  | Transmembrane protein involved in forming Cvt and autophagic vesicles; cycles between the phagophore assembly site (PAS) and other cytosolic             | 2.0 |      |
| YPR121W   | THI22 | Protein with similarity to hydroxymethylpyrimidine phosphate kinases; member of a gene family with THI20 and THI21; not required for                     | 2.0 |      |
| YLR120C   | YPS1  | Aspartic protease, member of the yapsin family of proteases involved in cell wall growth and maintenance; attached to the plasma membrane via            | 2.0 | 4.0  |
| YFL003C   | MSH4  | Protein involved in meiotic recombination, required for normal levels of crossing over, colocalizes with Zip2p to discrete foci on meiotic               | 2.0 |      |
| YKL129C   | MYO3  | One of two type I myosins; localizes to actin cortical patches; deletion of MYO3 has little effect on growth, but myo3 myo5 double deletion causes       | 2.0 | 2.4  |
| YEL049W   | PAU2  | Member of the seripauperin multigene family encoded mainly in subtelomeric regions, active during alcoholic fermentation, regulated by                   | 2.0 |      |
| YAR050W   | FLO1  | Lectin-like protein involved in flocculation, cell wall protein that binds to mannose chains on the surface of other cells, confers floc-forming ability | 2.0 | 32.9 |

|           |       |                                                                                                                                                     |      |      |
|-----------|-------|-----------------------------------------------------------------------------------------------------------------------------------------------------|------|------|
| YIL004C   | BET1  | Type II membrane protein required for vesicular transport between the endoplasmic reticulum and Golgi complex; v-SNARE with similarity to           | -2.0 |      |
| YOL058W   | ARG1  | Arginosuccinate synthetase, catalyzes the formation of L-argininosuccinate from citrulline and L-aspartate in the arginine                          | -2.0 |      |
| YDL090C   | RAM1  | Beta subunit of the CAAX farnesyltransferase (FTase) that prenylates the a-factor mating pheromone and Ras proteins; required for the               | -2.0 |      |
| YMR179W   | SPT21 | Protein with a role in transcriptional silencing; required for normal transcription at several loci including HTA2-HTB2 and HHF2-HHT2, but          | -2.0 |      |
| YGR041W   | BUD9  | Protein involved in bud-site selection; diploid mutants display a unipolar budding pattern instead of the wild-type bipolar pattern, and bud at the | -2.0 | -2.0 |
| YOR321W   | PMT3  | Protein O-mannosyltransferase, transfers mannose residues from dolichyl phosphate-D-mannose to protein serine/threonine residues; acts              | -2.0 |      |
| YOR342C   |       |                                                                                                                                                     | -2.0 | -2.3 |
| YDR503C   | LPP1  | Lipid phosphate phosphatase, catalyzes Mg(2+)-independent dephosphorylation of phosphatidic acid (PA), lysophosphatidic acid, and                   | -2.0 |      |
| YDR144C   | MKC7  | GPI-anchored aspartyl protease, member of the yapsin family of proteases involved in cell wall growth and maintenance; shares functions             | -2.0 |      |
| YEL038W   | UTR4  | Protein with sequence similarity to 2,3-diketo-5-methylthiopentyl-1-phosphate enolase-phosphatases, involved in methionine salvage; found           | -2.0 | -2.6 |
| YOR083W   | WHI5  | Repressor of G1 transcription that binds to SCB binding factor (SBF) at SCB target promoters in early G1; phosphorylation of Whi5p by the CDK,      | -2.0 |      |
| YJR030C   |       |                                                                                                                                                     | -2.1 |      |
| YBL009W   | ALK2  | Protein kinase; accumulation and phosphorylation are periodic during the cell cycle; phosphorylated in response to DNA damage; contains             | -2.1 | -2.1 |
| YBR202W   | MCM7  | Component of the hexameric MCM complex, which is important for priming origins of DNA replication in G1 and becomes an active ATP-                  | -2.1 | -3.0 |
| YIL117C   | PRM5  | Pheromone-regulated protein, predicted to have 1 transmembrane segment; induced during cell integrity signaling                                     | -2.1 |      |
| YHL035C   | VMR1  | Protein of unknown function that may interact with ribosomes, based on co-purification experiments; member of the ATP-binding cassette (ABC)        | -2.1 |      |
| YEL071W   | DLD3  | D-lactate dehydrogenase, part of the retrograde regulon which consists of genes whose expression is stimulated by damage to mitochondria and        | -2.1 |      |
| YIL009W   | FAA3  | Long chain fatty acyl-CoA synthetase, activates imported fatty acids; green fluorescent protein (GFP)-fusion protein localizes to the cell          | -2.1 |      |
| YMR292W   | GOT1  | Homodimeric protein that is packaged into COPII vesicles and cycles between the ER and Golgi; involved in secretory transport but not directly      | -2.1 |      |
| YDR501W   | PLM2  | Forkhead Associated domain containing protein and putative transcription factor found associated with chromatin; target of SBF                      | -2.1 |      |
| YBR088C   | POL30 | Proliferating cell nuclear antigen (PCNA), functions as the sliding clamp for DNA polymerase delta; may function as a docking site for other        | -2.1 |      |
| YHL047C   | ARN2  | Transporter, member of the ARN family of transporters that specifically recognize siderophore-iron chelates; responsible for uptake of iron bound   | -2.2 |      |
| YPL265W   | DIP5  | Dicarboxylic amino acid permease, mediates high-affinity and high-capacity transport of L-glutamate and L-aspartate; also a transporter for         | -2.2 | -3.9 |
| YOL012C   | HTZ1  | Histone variant H2AZ, exchanged for histone H2A in nucleosomes by the SWR1 complex; involved in transcriptional regulation through prevention       | -2.2 | -2.5 |
| YDR113C   | PDS1  | Securin, inhibits anaphase by binding separin Esp1p; blocks cyclin destruction and mitotic exit, essential for meiotic progression and mitotic      | -2.2 | -2.0 |
| YJR143C   | PMT4  | Protein O-mannosyltransferase, transfers mannose residues from dolichyl phosphate-D-mannose to protein serine/threonine residues;                   | -2.2 |      |
| YJL173C   | RFA3  | Subunit of heterotrimeric Replication Protein A (RPA), which is a highly conserved single-stranded DNA binding protein involved in DNA              | -2.2 |      |
| YJL074C   | SMC3  | Subunit of the multiprotein cohesin complex required for sister chromatid cohesion in mitotic cells; also required, with Rec8p, for cohesion and    | -2.2 |      |
| YGR205W   |       |                                                                                                                                                     | -2.2 |      |
| YOR381W-A |       |                                                                                                                                                     | -2.2 |      |
| YOR317W   | FAA1  | Long chain fatty acyl-CoA synthetase, activates imported fatty acids with a preference for C12:0-C16:0 chain lengths; functions in long chain fatty | -2.2 | -2.5 |
| YER070W   | RNR1  | Major isoform of the large subunit of ribonucleotide-diphosphate reductase; the RNR complex catalyzes rate-limiting step in dNTP                    | -2.2 | -2.3 |
| YOR073W   | SGO1  | Component of the spindle checkpoint, involved in sensing lack of tension on mitotic chromosomes; protects centromeric Rec8p at meiosis I;           | -2.2 | -2.3 |

|           |       |                                                                                                                                                            |      |       |
|-----------|-------|------------------------------------------------------------------------------------------------------------------------------------------------------------|------|-------|
| YGL012W   | ERG4  | C-24(28) sterol reductase, catalyzes the final step in ergosterol biosynthesis; mutants are viable, but lack ergosterol                                    | -2.3 | -2.0  |
| YAR018C   | KIN3  | Nonessential protein kinase with unknown cellular role                                                                                                     | -2.3 |       |
| YDL003W   | MCD1  | Essential subunit of the cohesin complex required for sister chromatid cohesion in mitosis and meiosis; apoptosis induces cleavage and                     | -2.3 |       |
| YGR177C   | ATF2  | Alcohol acetyltransferase, may play a role in steroid detoxification; forms volatile esters during fermentation, which is important for brewing and        | -2.3 | -2.3  |
| YJR109C   | CPA2  | Large subunit of carbamoyl phosphate synthetase, which catalyzes a step in the synthesis of citrulline, an arginine precursor                              | -2.3 | -2.0  |
| YDR518W   | EUG1  | Protein disulfide isomerase of the endoplasmic reticulum lumen, function overlaps with that of Pdi1p; may interact with nascent polypeptides in the        | -2.3 |       |
| YBR047W   | FMP23 | Putative protein of unknown function; proposed to be involved in iron or copper homeostasis; the authentic, non-tagged protein is detected in              | -2.3 |       |
| YOR108W   | LEU9  | Alpha-isopropylmalate synthase II (2-isopropylmalate synthase), catalyzes the first step in the leucine biosynthesis pathway; the minor                    | -2.3 | -4.3  |
| YKL043W   | PHD1  | Transcriptional activator that enhances pseudohyphal growth; regulates expression of FLO11, an adhesin required for pseudohyphal filament                  | -2.3 | -3.2  |
| YIL121W   | QDR2  | Multidrug transporter of the major facilitator superfamily, required for resistance to quinidine, barban, cisplatin, and bleomycin; may have a             | -2.3 | -2.4  |
| YNL121C   | TOM70 | Component of the TOM (translocase of outer membrane) complex responsible for recognition and initial import steps for all mitochondrially                  | -2.3 |       |
| YLR183C   | TOS4  | Forkhead Associated domain containing protein and putative transcription factor found associated with chromatin; target of SBF                             | -2.3 |       |
| YNL300W   | TOS6  | Glycosylphosphatidylinositol-dependent cell wall protein, expression is periodic and decreases in response to ergosterol perturbation or upon              | -2.3 |       |
| YBR265W   | TSC10 | 3-ketosphinganine reductase, catalyzes the second step in phytosphingosine synthesis, essential for growth in the absence of                               | -2.3 | -3.3  |
| YDR381W   | YRA1  | RNA binding protein required for export of poly(A) <sup>+</sup> mRNA from the nucleus; proposed to couple mRNA export with 3' end processing via its       | -2.3 |       |
| YGL256W   | ADH4  | Alcohol dehydrogenase isoenzyme type IV, dimeric enzyme demonstrated to be zinc-dependent despite sequence similarity to iron-                             | -2.4 |       |
| YOR074C   | CDC21 | Thymidylate synthase, required for de novo biosynthesis of pyrimidine deoxyribonucleotides; expression is induced at G1/S                                  | -2.4 |       |
| YPL127C   | HHO1  | Histone H1, a linker histone required for nucleosome packaging at restricted sites; suppresses DNA repair involving homologous                             | -2.4 |       |
| YDR528W   | HLR1  | Protein involved in regulation of cell wall composition and integrity and response to osmotic stress; overproduction suppresses a lysis sensitive          | -2.4 | -2.4  |
| YJL051W   | IRC8  | Bud tip localized protein of unknown function; mRNA is targeted to the bud by a She2p dependent transport system; mRNA is cell cycle                       | -2.4 | -2.3  |
| YPR194C   | OPT2  | Oligopeptide transporter; member of the OPT family, with potential orthologs in <i>S. pombe</i> and <i>C. albicans</i> ; also plays a role in formation of | -2.4 | -13.7 |
| YGR221C   | TOS2  | Protein involved in localization of Cdc24p to the site of bud growth; may act as a membrane anchor; localizes to the bud neck and bud tip;                 | -2.4 | -2.5  |
| YOR381W   | FRE3  | Ferric reductase, reduces siderophore-bound iron prior to uptake by transporters; expression induced by low iron levels                                    | -2.5 |       |
| YNR009W   | NRM1  | Transcriptional co-repressor of MBF (MCB binding factor)-regulated gene expression; Nrm1p associates stably with promoters via MBF to repress              | -2.5 | -3.8  |
| YML052W   | SUR7  | Plasma membrane protein that localizes to furrow-like invaginations (MCC patches); component of eisosomes; associated with endocytosis,                    | -2.5 | -3.5  |
| YLR212C   | TUB4  | Gamma-tubulin, involved in nucleating microtubules from both the cytoplasmic and nuclear faces of the spindle pole body                                    | -2.5 |       |
| YCL026C-A | FRM2  | Protein of unknown function, involved in the integration of lipid signaling pathways with cellular homeostasis; expression induced in cells treated        | -2.6 |       |
| YBL032W   | HEK2  | RNA binding protein involved in the asymmetric localization of ASH1 mRNA; represses translation of ASH1 mRNA, an effect reversed by                        | -2.6 |       |
| YPL250C   | ICY2  | Protein of unknown function; mobilized into polysomes upon a shift from a fermentable to nonfermentable carbon source; potential Cdc28p                    | -2.6 | -2.6  |
| YPL274W   | SAM3  | High-affinity S-adenosylmethionine permease, required for utilization of S-adenosylmethionine as a sulfur source; has similarity to S-                     | -2.6 | -7.8  |
| YJL047C-A |       |                                                                                                                                                            | -2.6 | -3.1  |
| YLR049C   |       |                                                                                                                                                            | -2.6 | -3.9  |
| YPL189W   | GUP2  | Probable membrane protein with a possible role in proton symport of glycerol; member of the MBOAT family of putative membrane-bound O-                     | -2.6 |       |



|           |        |                                                                                                                                                       |      |      |
|-----------|--------|-------------------------------------------------------------------------------------------------------------------------------------------------------|------|------|
| YHR175W-A |        |                                                                                                                                                       | -2.7 |      |
| YNL018C   |        |                                                                                                                                                       | -2.7 |      |
| YOR028C   | CIN5   | Basic leucine zipper (bZIP) transcription factor of the yAP-1 family, mediates pleiotropic drug resistance and salt tolerance; nuclearly              | -2.7 |      |
| YNR028W   | CPR8   | Peptidyl-prolyl cis-trans isomerase (cyclophilin), catalyzes the cis-trans isomerization of peptide bonds N-terminal to proline residues; similarity  | -2.7 | -2.8 |
| YHR143W   | DSE2   | Daughter cell-specific secreted protein with similarity to glucanases, degrades cell wall from the daughter side causing daughter to separate         | -2.7 | -5.1 |
| YNL327W   | EGT2   | Glycosylphosphatidylinositol (GPI)-anchored cell wall endoglucanase required for proper cell separation after cytokinesis, expression is              | -2.7 | -3.3 |
| YJL157C   | FAR1   | Cyclin-dependent kinase inhibitor that mediates cell cycle arrest in response to pheromone; also forms a complex with Cdc24p, Ste4p, and              | -2.7 | -5.3 |
| YCL024W   | KCC4   | Protein kinase of the bud neck involved in the septin checkpoint, associates with septin proteins, negatively regulates Swe1p by                      | -2.7 | -3.3 |
| YNL301C   | RPL18B | Protein component of the large (60S) ribosomal subunit, identical to Rpl18Ap and has similarity to rat L18 ribosomal protein                          | -2.7 | -2.2 |
| YOL014W   |        |                                                                                                                                                       | -2.8 |      |
| YDL198C   | GGC1   | Mitochondrial GTP/GDP transporter, essential for mitochondrial genome maintenance; has a role in mitochondrial iron transport; member of the          | -2.8 | -3.1 |
| YJR005C-A |        |                                                                                                                                                       | -2.9 |      |
| YGR109C   | CLB6   | B-type cyclin involved in DNA replication during S phase; activates Cdc28p to promote initiation of DNA synthesis; functions in formation of          | -2.9 | -4.2 |
| YOR010C   | TIR2   | Putative cell wall mannoprotein of the Srp1p/Tip1p family of serine-alanine-rich proteins; transcription is induced by cold shock and                 | -2.9 |      |
| YBR092C   | PHO3   | Constitutively expressed acid phosphatase similar to Pho5p; brought to the cell surface by transport vesicles; hydrolyzes thiamin phosphates in       | -2.9 | -3.7 |
| YAR031W   | PRM9   | Pheromone-regulated protein with 3 predicted transmembrane segments and an FF sequence, a motif involved in COPII binding; member of                  | -2.9 |      |
| YER011W   | TIR1   | Cell wall mannoprotein of the Srp1p/Tip1p family of serine-alanine-rich proteins; expression is downregulated at acidic pH and induced by cold        | -2.9 |      |
| YJL056C   | ZAP1   | Zinc-regulated transcription factor; binds to zinc-responsive promoters to induce transcription of certain genes in presence of zinc, represses other | -2.9 |      |
| YGL117W   |        |                                                                                                                                                       | -3.0 | -2.3 |
| YNL034W   |        |                                                                                                                                                       | -3.0 |      |
| YNL078W   | NIS1   | Protein localized in the bud neck at G2/M phase; physically interacts with septins; possibly involved in a mitotic signaling network                  | -3.0 | -2.7 |
| YJR004C   | SAG1   | Alpha-agglutinin of alpha-cells, binds to Aga1p during agglutination, N-terminal half is homologous to the immunoglobulin superfamily and             | -3.0 | -5.0 |
| YMR032W   | HOF1   | Bud neck-localized, SH3 domain-containing protein required for cytokinesis; regulates actomyosin ring dynamics and septin localization;               | -3.1 | -2.8 |
| YBL044W   |        |                                                                                                                                                       | -3.2 | -3.1 |
| YDR354W   | TRP4   | Anthranilate phosphoribosyl transferase of the tryptophan biosynthetic pathway, catalyzes the phosphoribosylation of anthranilate, subject to the     | -3.2 |      |
| YBR085W   | AAC3   | Mitochondrial inner membrane ADP/ATP translocator, exchanges cytosolic ADP for mitochondrially synthesized ATP; expressed under                       | -3.3 | -3.0 |
| YIL158W   | AIM20  | Putative protein of unknown function; overexpression causes a cell cycle delay or arrest; green fluorescent protein (GFP)-fusion protein localizes    | -3.3 | -3.2 |
| YDR044W   | HEM13  | Coproporphyrinogen III oxidase, an oxygen requiring enzyme that catalyzes the sixth step in the heme biosynthetic pathway; transcription              | -3.3 | -2.0 |
| YMR215W   | GAS3   | Putative 1,3-beta-glucanosyltransferase, has similarity to Gas1p; localizes to the cell wall                                                          | -3.4 | -3.8 |
| YOR387C   |        |                                                                                                                                                       | -3.6 |      |
| YDL241W   |        |                                                                                                                                                       | -3.7 |      |
| YPL241C   | CIN2   | GTPase-activating protein (GAP) for Cin4p; tubulin folding factor C involved in beta-tubulin (Tub2p) folding; mutants display increased               | -3.7 | -2.4 |
| YMR030W-A |        |                                                                                                                                                       | -3.8 | -2.3 |

|           |            |                                                                                                                                                    |       |       |
|-----------|------------|----------------------------------------------------------------------------------------------------------------------------------------------------|-------|-------|
| YMR230W-A |            |                                                                                                                                                    | -4.0  | -9.5  |
| YMR317W   |            |                                                                                                                                                    | -4.0  |       |
| YNL066W   | SUN4       | Cell wall protein related to glucanases, possibly involved in cell wall septation; member of the SUN family                                        | -4.0  | -6.3  |
| YMR006C   | PLB2       | Phospholipase B (lysophospholipase) involved in phospholipid metabolism; displays transacylase activity in vitro; overproduction                   | -4.2  | -2.1  |
| YJL078C   | PRY3       | Protein of unknown function                                                                                                                        | -4.2  | -3.6  |
| YER081W   | SER3       | 3-phosphoglycerate dehydrogenase, catalyzes the first step in serine and glycine biosynthesis; isozyme of Ser33p                                   | -4.2  |       |
| YHR214C-E |            |                                                                                                                                                    | -4.3  | -5.0  |
| YOR315W   | SFG1       | Nuclear protein, putative transcription factor required for growth of superficial pseudohyphae (which do not invade the agar substrate) but        | -4.3  | -9.4  |
| YBL002W   | HTB2       | Histone H2B, core histone protein required for chromatin assembly and chromosome function; nearly identical to HTB1; Rad6p-Bre1p-Lge1p             | -4.5  |       |
| YJL217W   | REE1       | Cytoplasmic protein involved in the regulation of enolase (ENO1); mRNA expression is induced by calcium shortage, copper deficiency (via           | -4.8  |       |
| YHR153C   | SPO16      | Meiosis-specific protein involved in synaptonemal complex assembly; implicated in regulation of crossover formation; required for sporulation      | -4.8  | -2.8  |
| YBL029W   |            |                                                                                                                                                    | -5.0  | -13.5 |
| YKR093W   | PTR2       | Integral membrane peptide transporter, mediates transport of di- and tri-peptides; conserved protein that contains 12 transmembrane domains;       | -5.0  |       |
| YGR234W   | YHB1       | Nitric oxide oxidoreductase, flavohemoglobin involved in nitric oxide detoxification; plays a role in the oxidative and nitrosative stress         | -5.0  | -3.6  |
| YNL058C   |            |                                                                                                                                                    | -5.3  |       |
| YLR348C   | DIC1       | Mitochondrial dicarboxylate carrier, integral membrane protein, catalyzes a dicarboxylate-phosphate exchange across the inner mitochondrial        | -5.3  | -2.0  |
| YHL028W   | WSC4       | ER membrane protein involved in the translocation of soluble secretory proteins and insertion of membrane proteins into the ER membrane; may       | -5.3  | -24.4 |
| YOR384W   | FRE5       | Putative ferric reductase with similarity to Fre2p; expression induced by low iron levels; the authentic, non-tagged protein is detected in highly | -5.6  |       |
| YBL003C   | HTA2       | Histone H2A, core histone protein required for chromatin assembly and chromosome function; one of two nearly identical (see also HTA1)             | -5.9  |       |
| YAR071W   | PHO11      | One of three repressible acid phosphatases, a glycoprotein that is transported to the cell surface by the secretory pathway; induced by            | -6.7  | -6.5  |
| YIL011W   | TIR3       | Cell wall mannoprotein of the Srp1p/Tip1p family of serine-alanine-rich proteins; expressed under anaerobic conditions and required for            | -7.1  | -4.1  |
| YKL220C   | FRE2       | Ferric reductase and cupric reductase, reduces siderophore-bound iron and oxidized copper prior to uptake by transporters; expression induced      | -7.7  |       |
| YAR073W   | IMD1       | Nonfunctional protein with homology to IMP dehydrogenase; probable pseudogene, located close to the telomere; is not expressed at                  | -8.3  |       |
| YHR216W   | IMD2       | Inosine monophosphate dehydrogenase, catalyzes the rate-limiting step in GTP biosynthesis, expression is induced by mycophenolic acid              | -8.3  |       |
| YGL089C   | MF(ALPHA)2 | Mating pheromone alpha-factor, made by alpha cells; interacts with mating type a cells to induce cell cycle arrest and other responses             | -9.1  | -7.1  |
| YGL258W   | VEL1       | Protein of unknown function; highly induced in zinc-depleted conditions and has increased expression in NAP1 deletion mutants                      | -9.1  |       |
| YJL218W   |            |                                                                                                                                                    | -10.6 | -6.2  |
| YDR534C   | FIT1       | Mannoprotein that is incorporated into the cell wall via a glycosylphosphatidylinositol (GPI) anchor, involved in the retention of                 | -11.6 |       |
| YDL227C   | HO         | Site-specific endonuclease required for gene conversion at the MAT locus (homothallic switching) through the generation of a ds DNA break;         | -16.7 | -6.0  |
