# Supplementary material
Source: PubMed Central journal article supplement (PMC3370752)
Supplement: supp_56.6.2894_TableS4.pdf [file supp_56.6.2894_TableS4.pdf]

| <b>Supplemental Table S4. Gene Expression Responses to 6NDA in <i>C. albicans</i></b> |                    |                    |                  |                                                                                                                               |                    |
|---------------------------------------------------------------------------------------|--------------------|--------------------|------------------|-------------------------------------------------------------------------------------------------------------------------------|--------------------|
| <b>ORF</b>                                                                            | <b>Gene symbol</b> | <b>Sc Ortholog</b> | <b>Oligo_ID*</b> | <b>Description</b>                                                                                                            | <b>Fold Change</b> |
| orf19.1048                                                                            | IFD6               | YPL088W            | opCaV0100001456  | Aldo-keto reductase family member; similar to aryl alcohol dehydrogenases, <i>S. cerevisiae</i> Ypl088wp; increased protein   | 23.7               |
| orf19.7504                                                                            |                    | RTS3               | CA06011_01       | Predicted ORF in Assemblies 19, 20 and 21; Plc1p-regulated; induced in core caspofungin response                              | 20.2               |
| orf19.320                                                                             |                    | YOR246C            | CA03439_01       | Predicted ORF in Assemblies 19, 20 and 21                                                                                     | 17.8               |
| orf19.4476                                                                            |                    | YPL088W            | opCaV0100000273  | Predicted ORF in Assemblies 19, 20 and 21                                                                                     | 16.4               |
| orf19.2724                                                                            |                    | MOT3               | opCaV0100000730  | Predicted ORF in Assemblies 19, 20 and 21                                                                                     | 11.9               |
|                                                                                       |                    |                    | CA02493_01       |                                                                                                                               | 9.6                |
| orf19.535                                                                             | RBR1               |                    | opCaV0100001550  | Glycosylphosphatidylinositol (GPI)-anchored cell wall protein required for filamentous growth at acidic pH; expression is     | 9.3                |
| orf19.2344                                                                            | ASR1               | HPF1               | opCaV0100000268  | Protein described as similar to heat shock proteins; transcription regulated by cAMP, osmotic stress, ciclopirox              | 8.5                |
| orf19.5113                                                                            | ADH2               | ADH1               | CA10232_01       | Putative alcohol dehydrogenase; soluble protein in hyphae; fungal-specific (no human or murine homolog); expression is        | 7.7                |
| orf19.2241                                                                            | PST1               | PST2               | opCaV0100001146  | Protein described as 1,4-benzoquinone reductase; hyphal-induced expression, regulated by Cyr1p, Ras1p, Efg1p, Nrg1p,          | 6.8                |
| orf19.23                                                                              | RTA3               | RSB1               | opCaV0100000022  | Similar to <i>S. cerevisiae</i> Rta1p (role in 7-aminosterol resistance) and Rsb1p (flippase); putative membrane protein;     | 6.6                |
| orf19.3051                                                                            |                    | YJR116W            | CA05177_01       | Predicted ORF in Assemblies 19, 20 and 21; shows colony morphology-related gene regulation by Ssn6p                           | 6.4                |
| orf19.7585                                                                            | INO1               | INO1               | CA10179_01       | Inositol-1-phosphate synthase; enzyme of inositol biosynthesis; antigenic in human; repressed by farnesol (in biofilm) or     | 6.2                |
|                                                                                       |                    |                    | CA10170_01       |                                                                                                                               | 5.9                |
| orf19.4077                                                                            | MIT1               | SUR1 CSH1          | CA01846_01       | Protein involved in sphingolipid biosynthesis; required for mannosylation of inositol phosphoceramide (IPC) to form           | 5.7                |
| orf19.6000                                                                            | CDR1               | PDR5               | opCaV0100000146  | Multidrug transporter of ATP-binding cassette (ABC) superfamily; transports phospholipids in an in-to-out direction;          | 5.6                |
| orf19.4477                                                                            | CSH1               | YPL088W            | opCaV0100000003  | Member of aldo-keto reductase family, similar to aryl alcohol dehydrogenases; role in adhesion to fibronectin, cell surface   | 5.4                |
| orf19.3249                                                                            | LAG1               | LAG1               | CA05577_01       | Predicted ORF in Assemblies 19, 20 and 21; amphotericin B repressed                                                           | 5.3                |
| orf19.2515                                                                            |                    |                    | CA02303_01       | Predicted ORF in Assemblies 19, 20 and 21                                                                                     | 5.3                |
| orf19.5431                                                                            |                    |                    | CA05940_01       | Predicted ORF in Assemblies 19, 20 and 21                                                                                     | 5.2                |
| orf19.4819                                                                            |                    |                    | opCaV0100000885  | Predicted ORF in Assemblies 19, 20 and 21                                                                                     | 5.2                |
|                                                                                       |                    |                    | CA10089_01       |                                                                                                                               | 5.0                |
| orf19.7166                                                                            |                    | YGR110W            | CA05421_01       | Predicted ORF in Assemblies 19, 20 and 21; increased transcription is observed in an azole-resistant strain that              | 4.9                |
| orf19.4128                                                                            |                    | YOR059C            | CA01434_01       | Predicted ORF in Assemblies 19, 20 and 21                                                                                     | 4.9                |
| orf19.5759                                                                            | SNQ2               | SNQ2               | CA03858_01       | Protein similar to <i>S. cerevisiae</i> Ssq2p transporter; member of PDR subfamily of ABC family; transposon mutation affects | 4.7                |
| orf19.5295                                                                            |                    |                    | CA02319_01       | Predicted ORF in Assemblies 19, 20 and 21; transcription is induced in response to alpha pheromone in SpiderM medium          | 4.6                |
| orf19.1287                                                                            |                    |                    | CA02513_01       | Predicted ORF in Assemblies 19, 20 and 21; possibly spurious ORF (Annotation Working Group prediction)                        | 4.5                |
| orf19.4818                                                                            |                    |                    | CA01376_01       | Predicted ORF in Assemblies 19, 20 and 21                                                                                     | 4.4                |
| orf19.5775.3                                                                          |                    |                    | opCaV0100001488  | ORF Predicted by Annotation Working Group; removed from Assembly 21                                                           | 4.4                |

|               |       |         |                 |                                                                                                                                |     |
|---------------|-------|---------|-----------------|--------------------------------------------------------------------------------------------------------------------------------|-----|
| orf19.771     | LPG20 | YPL088W | opCaV0100000793 | Protein of aldo-keto reductase family; nonessential; similar to aryl alcohol dehydrogenases, <i>S. cerevisiae</i> Ypl088wp, A. | 4.4 |
| orf19.3672    | GAL10 | GAL10   | CA04058_01      | UDP-glucose 4-epimerase, required for galactose utilization; mutant shows cell wall defects and increased filamentation;       | 4.3 |
| orf19.2726    |       | SFK1    | CA01435_01      | Predicted ORF in Assemblies 19, 20 and 21; Plc1p-regulated                                                                     | 4.2 |
| orf19.4432    |       | KSP1    | CA01548_01      | Predicted ORF in Assemblies 19, 20 and 21                                                                                      | 4.2 |
|               |       |         | CA10131_01      |                                                                                                                                | 4.2 |
| orf19.689     | PLB1  | PLB3    | opCaV0100001535 | Phospholipase B; required for wild-type host cell penetration and for wild-type virulence in mouse model of systemic           | 4.1 |
| orf19.909     | STP4  | STP3    | CA02326_01      | Putative transcription factor with zinc finger DNA-binding motif; induced in core caspofungin response; shows colony           | 4.1 |
| orf19.1301    |       |         | CA00851_01      | Predicted ORF in Assemblies 19, 20 and 21                                                                                      | 4.1 |
|               |       |         | CA05457_01      |                                                                                                                                | 4.0 |
| orf19.6489    | FMP45 | FMP45   | CA00713_01      | Protein induced during the mating process; alkaline downregulated; repressed in response to alpha pheromone in                 | 4.0 |
| orf19.4504    |       | ADH1    | opCaV0100000201 | Predicted ORF in Assemblies 19, 20 and 21                                                                                      | 3.9 |
| orf19.7306    |       | YPR127W | CA05692_01      | Protein of aldo-keto reductase family; increased transcription is associated with MDR1 overexpression, benomyl or long-term    | 3.9 |
| orf19.4155.12 |       |         | opCaV0100000114 | ORF Predicted by Annotation Working Group; removed from Assembly 20                                                            | 3.8 |
| orf19.5683    |       | YHR140W | CA02723_01      | Predicted ORF in Assemblies 19, 20 and 21                                                                                      | 3.8 |
| orf19.3250    |       | PRP40   | CA05578_01      | Predicted ORF in Assemblies 19, 20 and 21                                                                                      | 3.8 |
| orf19.181     |       |         | opCaV0100001090 | Predicted ORF from Assembly 19; merged with orf19.4128 in Assembly 20                                                          | 3.7 |
| orf19.6068    | SVF1  | SVF1    | CA05016_01      | Predicted ORF in Assemblies 19, 20 and 21; fluconazole-induced; regulated by Gcn4p; repressed in response to amino             | 3.7 |
| orf19.2768    | AMS1  | AMS1    | CA04146_01      | Putative alpha-mannosidase; transcription is regulated by Nrg1p; induced during cell wall regeneration                         | 3.6 |
| orf19.1945    | AUR1  | AUR1    | opCaV0100000717 | Inositolphosphorylceramide (IPC) synthase, catalyzes the key step in the synthesis of sphingolipids; potential target for      | 3.6 |
| orf19.3544    |       | YML131W | CA02551_01      | Predicted ORF in Assemblies 19, 20 and 21                                                                                      | 3.6 |
| orf19.6229    | CAT1  | CTA1    | CA10133_01      | Catalase; role in resistance to oxidative stress, including neutrophils, peroxide; role in murine systemic virulence;          | 3.6 |
| orf19.7441    |       | BRR6    | CA05879_01      | Predicted ORF in Assemblies 19, 20 and 21                                                                                      | 3.5 |
| orf19.1783    | YOR1  | YOR1    | CA01441_01      | Protein similar to <i>S. cerevisiae</i> Yor1p, which is a plasma membrane transporter of the ATP-binding cassette (ABC)        | 3.5 |
| orf19.251     |       | HSP31   | CA01159_01      | Member of ThiJ/Pfpl protein family; antigenic (Cand a 3 allergen); binds human immunoglobulin E; 2 N-glycosylation             | 3.4 |
| orf19.1964    |       |         | CA03038_01      | Decreased transcription is observed upon fluphenazine treatment; increased transcription is observed upon benomyl              | 3.4 |
| orf19.1069    | RPN4  | RPN4    | CA02955_01      | DNA binding protein with Cys2-His2 zinc-finger; putative regulator of proteasome genes; DNA recognition sequence               | 3.4 |
| orf19.2175    |       | AIF1    | CA03777_01      | Predicted ORF in Assemblies 19, 20 and 21; induced by nitric oxide                                                             | 3.4 |
| orf19.3369    | MOH1  | MOH1    | opCaV0100000434 | Protein similar to <i>S. cerevisiae</i> Moh1p; transcription is induced in response to alpha pheromone in SpiderM medium       | 3.3 |
| orf19.7350    |       | YNL208W | CA05803_01      | Predicted ORF in Assemblies 19, 20 and 21; soluble protein in hyphae; fluconazole-induced; greater mRNA abundance              | 3.3 |
| orf19.2458    |       | SIP5    | CA00493_01      | Putative transcription factor with zinc finger DNA-binding motif                                                               | 3.3 |
| orf19.6169.2  |       |         | opCaV0100001305 | ORF Predicted by Annotation Working Group; fluconazole-downregulated; merged with orf19.2496 in Assembly 20                    | 3.3 |

|              |        |         |                 |                                                                                                                                   |     |
|--------------|--------|---------|-----------------|-----------------------------------------------------------------------------------------------------------------------------------|-----|
|              |        |         | CA05804_01      |                                                                                                                                   | 3.2 |
| orf19.7330   |        | PET18   | CA05713_01      | Predicted ORF in Assemblies 19, 20 and 21                                                                                         | 3.2 |
| orf19.1721   | NCE103 | NCE103  | CA02907_01      | Carbonic anhydrase involved in the conversion of carbon dioxide to bicarbonate; essential for pathogenesis in host                | 3.2 |
| orf19.4658   |        |         | CA02817_01      | Protein not essential for viability                                                                                               | 3.2 |
| orf19.4082   | DDR48  | DDR48   | CA04361_01      | Immunogenic stress-associated protein; regulated by filamentous growth pathways; induced by benomyl,                              | 3.2 |
| orf19.2062   | SOD4   |         | opCaV0100001556 | Copper- and zinc-containing superoxide dismutase, expression is regulated during white-opaque switching; ciclopirox olamine       | 3.2 |
| orf19.6318   |        | YJR085C | CA03348_01      | Predicted ORF in Assemblies 19, 20 and 21                                                                                         | 3.2 |
| orf19.3340   | SOD2   | SOD2    | CA10051_01      | Mitochondrial manganese-containing superoxide dismutase; role in protection against oxidative stress; active as                   | 3.2 |
| orf19.4420   |        | RRN6    | CA02502_01      | Predicted ORF in Assemblies 19, 20 and 21                                                                                         | 3.2 |
|              |        |         | CA10099_01      |                                                                                                                                   | 3.2 |
| orf19.7514   | PCK1   | PCK1    | opCaV0100001484 | Phosphoenolpyruvate carboxykinase; role in gluconeogenesis; regulated by hyphal switch, carbon source; repressed on               | 3.2 |
| orf19.6957.3 |        |         | opCaV0100000602 | ORF Predicted by Annotation Working Group; removed from Assembly 20                                                               | 3.2 |
| orf19.4690   |        | SMF1    | opCaV0100000172 | Predicted ORF in Assemblies 19, 20 and 21; induced by nitric oxide in yhb1 mutant                                                 | 3.1 |
| orf19.4706   |        | PIN2    | opCaV0100000133 | Predicted ORF in Assemblies 19, 20 and 21; greater mRNA abundance observed in a <i>cyr1</i> or <i>ras1</i> homozygous null mutant | 3.1 |
| orf19.55     |        | ZH2 ZH1 | opCaV0100001342 | Predicted ORF in Assemblies 19, 20 and 21                                                                                         | 3.1 |
| orf19.6627   |        |         | CA04095_01      | Predicted ORF in Assemblies 19, 20 and 21; possibly transcriptionally regulated upon hyphal formation                             | 3.0 |
| orf19.3854   |        | SAT4    | CA03163_01      | Protein similar to <i>S. cerevisiae</i> Sat4p; amphotericin B induced                                                             | 3.0 |
| orf19.4970   |        | SRP40   | CA01104_01      | Predicted ORF in Assemblies 19, 20 and 21                                                                                         | 3.0 |
| orf19.3682   | CWH8   | CAX4    | CA01426_01      | Putative dolichyl pyrophosphate (Dol-P-P) phosphatase; ketoconazole-induced; expression is increased in a fluconazole-            | 3.0 |
| orf19.4899   | GCA1   | ROT2    | CA00339_01      | Predicted extracellular or plasma membrane-associated glucoamylase; possible adhesin; gene is transcribed during rat              | 3.0 |
| orf19.3364   |        |         | opCaV0100000167 | Predicted ORF in Assemblies 19, 20 and 21; possibly spurious ORF (Annotation Working Group prediction)                            | 3.0 |
| orf19.1369   |        |         | CA03194_01      | Predicted ORF in Assemblies 19, 20 and 21                                                                                         | 3.0 |
|              |        |         | CA03037_01      |                                                                                                                                   | 3.0 |
| orf19.1784   |        |         | CA01442_01      | Protein similar to <i>S. cerevisiae</i> Yor1p, a plasma membrane transporter of the ATP-binding cassette (ABC) family involved    | 2.9 |
| orf19.6007   |        | ELO1    | CA06248_01      | Predicted ORF in Assemblies 19, 20 and 21                                                                                         | 2.9 |
| orf19.6660   |        | YHR131C | CA04291_01      | Predicted ORF in Assemblies 19, 20 and 21                                                                                         | 2.9 |
| orf19.1979   | GIT1   | GIT1    | opCaV0100000834 | Putative glycerophosphoinositol permease; fungal-specific (no human or murine homolog); alkaline downregulated;                   | 2.9 |
| orf19.6601.1 | YKE2   | YKE2    | opCaV0100001210 | Possible cytoskeletal modulator; transcription induced upon yeast-to-hyphal switch; regulated by Nrg1p, Tup1p                     | 2.9 |
| orf19.1224   | FRP3   | ATO2    | opCaV0100001195 | Upregulated in the presence of human neutrophils; fluconazole-downregulated; repressed by nitric oxide                            | 2.9 |
| orf19.5194.1 |        | YIR035C | opCaV0100000608 | ORF Predicted by Annotation Working Group                                                                                         | 2.8 |
| orf19.3050   | AGE1   | AGE1    | CA05176_01      | Protein described as a GTPase activator; transcriptionally regulated by iron; expression greater in low iron                      | 2.8 |

|              |       |           |                 |                                                                                                                                 |     |
|--------------|-------|-----------|-----------------|---------------------------------------------------------------------------------------------------------------------------------|-----|
| orf19.4780   |       | YJR124C   | CA00872_01      | Predicted ORF in Assemblies 19, 20 and 21                                                                                       | 2.8 |
| orf19.7175   | HLJ1  | HLJ1      | CA05428_01      | Protein repressed during the mating process                                                                                     | 2.8 |
| orf19.4963   |       | YDR161W   | CA01613_01      | Predicted ORF in Assemblies 19, 20 and 21                                                                                       | 2.8 |
| orf19.4135   | PRC2  | PRC1      | CA01482_01      | Protein described as a carboxypeptidase; upregulated in the presence of human neutrophils                                       | 2.8 |
| orf19.6877   |       |           | CA04613_01      | Predicted ORF in Assemblies 19, 20 and 21; transcription is upregulated in response to treatment with caspofungin,              | 2.8 |
| orf19.334    |       |           | opCaV0100000480 | Predicted ORF in Assemblies 19, 20 and 21                                                                                       | 2.8 |
| orf19.3607   |       | ECM18     | CA01413_01      | Predicted ORF in Assemblies 19, 20 and 21                                                                                       | 2.7 |
| orf19.192    |       |           | CA01683_01      | Predicted ORF in Assemblies 19, 20 and 21                                                                                       | 2.7 |
| orf19.2802   | PDR10 |           | opCaV0100000958 | Upregulated by Rim101p at pH 8; merged with orf19.918 in Assembly 20                                                            | 2.7 |
| orf19.2341   |       | HNT1      | CA02496_01      | Predicted ORF in Assemblies 19, 20 and 21                                                                                       | 2.7 |
| orf19.4659   |       | PRP21     | CA02818_01      | Predicted ORF in Assemblies 19, 20 and 21                                                                                       | 2.7 |
| orf19.4907   |       | YCR061W   | CA02195_01      | Predicted ORF in Assemblies 19, 20 and 21; increased transcription is observed upon fluphenazine treatment; possibly            | 2.7 |
| orf19.6769   |       | YHL029C   | CA06098_01      | Predicted ORF in Assemblies 19, 20 and 21                                                                                       | 2.7 |
| orf19.4779   |       | YKR105C   | CA01113_01      | Putative transporter; slightly similar to the Sit1p siderophore transporter; Gcn4p-regulated; fungal-specific (no human or      | 2.7 |
| orf19.94     |       |           | CA02162_01      | Predicted ORF in Assemblies 19, 20 and 21                                                                                       | 2.7 |
| orf19.93     |       | MIC17     | opCaV0100000937 | Predicted ORF in Assemblies 19, 20 and 21; shows colony morphology-related gene regulation by Ssn6p                             | 2.6 |
| orf19.6869   |       | AST2      | CA04607_01      | Predicted ORF in Assemblies 19, 20 and 21                                                                                       | 2.6 |
|              |       |           | CA11012_01      |                                                                                                                                 | 2.6 |
| orf19.7053   | GAC1  | GAC1      | CA05795_01      | Protein described as similar to regulatory subunit of serine/threonine phosphoprotein phosphatase 1; fluconazole-               | 2.5 |
|              |       |           | CA06100_01      |                                                                                                                                 | 2.5 |
|              |       |           | CA00697_01      |                                                                                                                                 | 2.5 |
| orf19.4279   | MNN1  | MNN1      | CA01775_01      | Putative alpha-1,3-mannosyltransferase, a component of mannosyltransferase complex; transcription is negatively                 | 2.5 |
| orf19.5576   |       | YDR531W   | CA01022_01      | Protein similar to <i>S. cerevisiae</i> Ydr531wp; transposon mutation affects filamentous growth; downregulated in core stress  | 2.5 |
| orf19.4056   | GAT2  | GAT2      | CA01405_01      | Putative DNA-binding transcription factor; similar to <i>S. cerevisiae</i> Gat2p; transposon mutation affects filamentous       | 2.5 |
| orf19.6833.2 |       |           | opCaV0100001200 | ORF Predicted by Annotation Working Group                                                                                       | 2.5 |
| orf19.753    |       | MNT4 MNT2 | CA02118_01      | Predicted ORF in Assemblies 19, 20 and 21                                                                                       | 2.5 |
| orf19.5192   |       |           | CA02043_01      | Predicted ORF from Assembly 19; removed from Assembly 20                                                                        | 2.4 |
| orf19.851    |       | MNN4      | CA00938_01      | Protein of unknown function; transcription is negatively regulated by Rim101p                                                   | 2.4 |
| orf19.35     |       | SKY1      | CA01070_01      | Predicted ORF in Assemblies 19, 20 and 21                                                                                       | 2.4 |
| orf19.941    | SEC14 | SEC14     | CA10295_01      | Essential protein; functional homolog of <i>S. cerevisiae</i> Sec14p, which is a Golgi phosphatidylinositol/phosphatidylcholine | 2.4 |
| orf19.2244   |       | YJR096W   | CA00695_01      | Similar to oxidoreductases and to <i>S. cerevisiae</i> Yjr096wp; transcription is negatively regulated by Sfu1p; increased      | 2.4 |

|              |        |                   |                 |                                                                                                                                     |      |
|--------------|--------|-------------------|-----------------|-------------------------------------------------------------------------------------------------------------------------------------|------|
| orf19.1149   | MRF1   | ETR1              | CA01586_01      | Protein similar to mitochondrial respiratory proteins; increased transcription is observed upon benomyl treatment; induced by       | 2.4  |
| orf19.7229   |        | IML2              | CA05473_01      | Predicted ORF in Assemblies 19, 20 and 21                                                                                           | 2.4  |
| orf19.2608   | ADH5   | ADH5              | CA02540_01      | Putative alcohol dehydrogenase; soluble protein in hyphae; expression is regulated upon white-opaque switching;                     | 2.4  |
| orf19.2432   | HAC1   | HAC1              | CA00857_01      | Putative transcription factor with bZIP DNA-binding motif; induced during the mating process; caspofungin induced                   | 2.4  |
| orf19.4263   |        |                   | CA00693_01      | Predicted ORF in Assemblies 19, 20 and 21; possibly spurious ORF (Annotation Working Group prediction)                              | 2.4  |
| orf19.1225   |        |                   | CA00825_01      | Predicted ORF in Assemblies 19, 20 and 21; possibly spurious ORF (Annotation Working Group prediction)                              | 2.4  |
| orf19.3994   |        | OST3              | CA04829_01      | Predicted ORF in Assemblies 19, 20 and 21                                                                                           | 2.3  |
| orf19.2903   |        |                   | CA03797_01      | Predicted ORF in Assemblies 19, 20 and 21; hyphal-induced expression, regulated by Cyr1p, Ras1p, Efg1p, Nrg1p, Tup1p                | 2.3  |
| orf19.1505   |        |                   | CA02065_01      | Predicted ORF in Assemblies 19, 20 and 21                                                                                           | 2.3  |
| orf19.6043   |        | DLD1              | CA04991_01      | Predicted ORF in Assemblies 19, 20 and 21                                                                                           | 2.3  |
| orf19.4943   | PSA2   | PSA1              | CA03747_01      | Predicted ORF in Assemblies 19, 20 and 21; macrophage-downregulated gene                                                            | 2.3  |
| orf19.3171   | ACH1   | ACH1              | CA00752_01      | Soluble protein in hyphae; similar to <i>S. cerevisiae</i> Ach1p, which is acetyl-coA hydrolase required for acetate utilization;   | 2.3  |
| orf19.1671   | UTR2   | UTR2              | CA00977_01      | Putative cell-surface glycosidase, role in adhesion; required for hyphal growth on Spider (not serum) medium; chitin-binding,       | 2.3  |
| orf19.3649   |        | FES1              | CA00596_01      | Predicted ORF in Assemblies 19, 20 and 21                                                                                           | 2.3  |
| orf19.4262   |        | JSN1              | CA00692_01      | Predicted ORF in Assemblies 19, 20 and 21                                                                                           | 2.3  |
| orf19.7030   | SSR1   | CCW14             | CA05328_01      | Beta-glucan associated cell-wall protein with role in cell wall structure; S/T rich protein, GPI anchor; similar mRNA               | 2.2  |
| orf19.2686   |        | CPS1              | CA02878_01      | Predicted ORF in Assemblies 19, 20 and 21                                                                                           | 2.2  |
| orf19.2232   | RPL11  | RPL11A <br>RPL11B | CA01100_01      | Predicted ribosomal protein; genes encoding cytoplasmic ribosomal subunits, translation factors, and tRNA synthetases               | -2.2 |
| orf19.3465   | RPL10A | RPL1A <br>RPL1B   | opCaV0100000672 | Predicted ribosomal protein; genes encoding cytoplasmic ribosomal subunits, translation factors, and tRNA synthetases               | -2.2 |
| orf19.5904   | RPL19A | RPL19A <br>RPL19B | CA06338_01      | Predicted ribosomal protein; genes encoding cytoplasmic ribosomal subunits, translation factors, and tRNA synthetases               | -2.2 |
| orf19.4447   | YMC1   | YMC1              | CA04715_01      | Predicted ORF in Assemblies 19, 20 and 21; flucytosine induced                                                                      | -2.2 |
| orf19.5838   |        | SER2              | CA03814_01      | Predicted ORF in Assemblies 19, 20 and 21                                                                                           | -2.2 |
| orf19.4013   |        | YHR045W           | CA04846_01      | Predicted ORF in Assemblies 19, 20 and 21                                                                                           | -2.2 |
| orf19.1700   | RPS7A  | RPS7A             | CA01734_01      | Predicted ribosomal protein; genes encoding cytoplasmic ribosomal subunits, translation factors, and tRNA synthetases               | -2.2 |
| orf19.4193.1 | RPS13  | RPS13             | opCaV0100000796 | Putative ribosomal protein; ORF predicted by Annotation Working Group                                                               | -2.2 |
| orf19.3341   |        | YDR341C           | CA02831_01      | Putative tRNA-Arg synthetase; essential; <i>S. cerevisiae</i> ortholog is essential; genes encoding ribosomal subunits, translation | -2.2 |
| orf19.687.1  | RPL25  | RPL25             | opCaV0100001569 | ORF Predicted by Annotation Working Group; shows colony morphology-related gene regulation by Ssn6p                                 | -2.2 |
| orf19.3942.1 | RPL43A | RPL43A <br>RPL43B | opCaV0100000001 | Downregulated in the presence of human whole blood or polymorphonuclear (PMN) cells; shows colony morphology-                       | -2.2 |
| orf19.5225.2 | RPL27A | RPL27A            | opCaV0100001307 | Predicted ribosomal protein                                                                                                         | -2.2 |
| orf19.5982   | RPL18  | RPL18A <br>RPL18B | CA06267_01      | Predicted ribosomal protein; Plc1p-regulated; genes encoding cytoplasmic ribosomal subunits, translation factors, and tRNA          | -2.2 |
| orf19.4632   | RPL20B | RPL20B <br>RPL20A | CA01082_01      | Predicted ribosomal protein; genes encoding cytoplasmic ribosomal subunits, translation factors, and tRNA synthetases               | -2.2 |

|              |        |                   |                 |                                                                                                                                 |      |
|--------------|--------|-------------------|-----------------|---------------------------------------------------------------------------------------------------------------------------------|------|
| orf19.6253   | RPS23A | RPS23B <br>RPS23A | opCaV0100001636 | Putative ribosomal protein; genes encoding cytoplasmic ribosomal subunits, translation factors, and tRNA synthetases            | -2.3 |
| orf19.2864.1 | RPL28  | RPL28             | opCaV0100001003 | Putative ribosomal protein; Plc1p-regulated; genes encoding cytoplasmic ribosomal subunits, translation factors, and tRNA       | -2.3 |
| orf19.6085   | RPL16A | RPL16A            | CA03900_01      | Protein similar to <i>S. cerevisiae</i> ribosomal protein Rpl16Ap; transposon mutation affects filamentous growth; genes        | -2.3 |
| orf19.5809   |        | BNA3              | CA04180_01      | Predicted ORF in Assemblies 19, 20 and 21; Gcn4p-regulated                                                                      | -2.3 |
| orf19.667.1  | RPL37B | RPL37B            | opCaV0100000159 | Predicted ribosomal protein                                                                                                     | -2.3 |
| orf19.2994   | RPL13  | RPL13A            | CA10240_01      | Protein described as ribosomal subunit; antigenic during murine systemic infection; genes encoding cytoplasmic                  | -2.3 |
| orf19.6415.1 |        | RPS29A            | opCaV0100001563 | ORF Predicted by Annotation Working Group; intron in 5'-UTR                                                                     | -2.3 |
| orf19.2560   | CDC60  | CDC60             | CA02223_01      | Cytosolic leucyl tRNA synthetase; has conserved amino acid and ATP binding class I signature, tRNA binding, and                 | -2.3 |
| orf19.3789   | RPL24A | RPL24B            | opCaV0100001310 | Predicted ribosomal protein; genes encoding cytoplasmic ribosomal subunits, translation factors, and tRNA synthetases           | -2.3 |
| orf19.3222   |        | YGR125W           | CA01043_01      | Predicted ORF in Assemblies 19, 20 and 21; fungal-specific (no human or murine homolog)                                         | -2.3 |
| orf19.5466   | RPS24  | RPS24B <br>RPS24A | CA05972_01      | Predicted ribosomal protein; hyphal downregulated; genes encoding cytoplasmic ribosomal subunits, translation factors,          | -2.3 |
| orf19.7217   | RPL4B  | RPL4B             | CA05463_01      | Putative ribosomal protein; genes encoding cytoplasmic ribosomal subunits, translation factors, and tRNA synthetases            | -2.3 |
| orf19.4616   | POL30  | POL30             | CA05292_01      | Protein described as proliferating cell nuclear antigen (PCNA); RNA abundance regulated by tyrosol and cell density;            | -2.3 |
| orf19.2329.1 | RPS17B | RPS17B            | opCaV0100000177 | Putative ribosomal protein; genes encoding cytoplasmic ribosomal subunits, translation factors, and tRNA synthetases            | -2.3 |
| orf19.1601   | RPL3   | RPL3              | CA00983_01      | Putative ribosomal protein; similar to <i>S. cerevisiae</i> Rpl3p; gene induced by ciclopirox olamine treatment; genes encoding | -2.3 |
| orf19.6689   | ARG4   | ARG4              | CA10030_01      | Argininosuccinate lyase, catalyzes the final step in the arginine biosynthesis pathway; alkaline downregulated                  | -2.3 |
| orf19.5408   |        | HRK1              | CA05917_01      | Predicted ORF in Assemblies 19, 20 and 21                                                                                       | -2.3 |
| orf19.6286.2 | RPS27  | RPS27B            | opCaV0100001419 | Putative ribosomal protein; genes encoding cytoplasmic ribosomal subunits, translation factors, and tRNA synthetases            | -2.3 |
| orf19.3690.2 |        | RPL26B            | opCaV0100000387 | ORF Predicted by Annotation Working Group                                                                                       | -2.3 |
| orf19.6265   | RPS22A | RPS22A            | CA03726_01      | Predicted ribosomal protein; genes encoding cytoplasmic ribosomal subunits, translation factors, and tRNA synthetases           | -2.3 |
| orf19.7278   |        |                   | opCaV0100000011 | Similar to a region of the Tca2 (pCal) retrotransposon, which is present in strain hOG1042 as 50 to 100 copies of a linear      | -2.3 |
| orf19.2309.2 |        | RPL2A <br>RPL2B   | opCaV0100000147 | ORF Predicted by Annotation Working Group                                                                                       | -2.3 |
| orf19.4623.3 | NHP6A  | NHP6B             | CA00170_01      | Protein described as nonhistone chromatin component; RNA abundance regulated by tyrosol and cell density; amphotericin          | -2.4 |
|              |        |                   | CA10053_01      |                                                                                                                                 | -2.4 |
| orf19.7297   |        | YHR112C           | CA05686_01      | Predicted ORF in Assemblies 19, 20 and 21; Hog1p-induced; Gcn4p-regulated                                                       | -2.4 |
| orf19.3572.3 |        | RPL31B <br>RPL31A | opCaV0100000884 | ORF Predicted by Annotation Working Group                                                                                       | -2.4 |
| orf19.3334   | RPS21  | RPS2              | CA01931_01      | Predicted ribosomal protein; genes encoding cytoplasmic ribosomal subunits, translation factors, and tRNA synthetases           | -2.4 |
| orf19.3415.1 | RPL32  | RPL32             | opCaV0100001058 | Predicted ribosomal protein                                                                                                     | -2.4 |
|              |        |                   | CA10037_01      |                                                                                                                                 | -2.4 |
| orf19.18     | IMH3   | IMD4              | CA10062_01      | Inosine monophosphate (IMP) dehydrogenase; enzyme of GMP biosynthesis; target of mycophenolic acid and mizoribine               | -2.4 |
| orf19.6265.1 | RPS14B | RPS14B <br>RPS14A | opCaV0100000975 | Putative ribosomal protein; genes encoding cytoplasmic ribosomal subunits, translation factors, and tRNA synthetases            | -2.4 |

|              |        |                   |                 |                                                                                                                                      |      |
|--------------|--------|-------------------|-----------------|--------------------------------------------------------------------------------------------------------------------------------------|------|
| orf19.3752   | RAD51  | RAD51             | CA02498_01      | Predicted ORF in Assemblies 19, 20 and 21; flucytosine induced                                                                       | -2.4 |
| orf19.5094   | BUL1   | BSC5              | CA03918_01      | Protein not essential for viability; macrophage/pseudohyphal-induced; similar to <i>S. cerevisiae</i> Bul1p, which may be involved   | -2.4 |
| orf19.3354   |        | RPS4A <br>RPS4B   | CA10098_01      | Predicted ORF in Assemblies 19, 20 and 21                                                                                            | -2.4 |
| orf19.6975   | YST1   | RPS0A             | CA00283_01      | Ribosome-associated protein; complements viability of <i>S. cerevisiae</i> yst1 yst2 mutant; similar to laminin-binding proteins,    | -2.4 |
| orf19.5719   |        |                   | CA03576_01      | Predicted ORF from Assembly 19; removed from Assembly 20                                                                             | -2.4 |
| orf19.4650   | ILV6   | ILV6              | CA01936_01      | Putative regulatory subunit of acetolacetate synthase ; fungal-specific (no human or murine homolog); alkaline upregulated;          | -2.4 |
| orf19.1756   | GPD1   | GPD1              | CA02416_01      | Protein similar to <i>S. cerevisiae</i> glycerol-3-phosphate dehydrogenase (enzyme of glycerol biosynthesis); biofilm-               | -2.4 |
| orf19.5996.1 | RPS19A | RPS19A            | opCaV0100000795 | Putative ribosomal protein; ORF Predicted by Annotation Working Group                                                                | -2.4 |
| orf19.4149.1 |        | RPS11A <br>RPS11B | opCaV0100001496 | ORF Predicted by Annotation Working Group                                                                                            | -2.4 |
| orf19.3066   | ENG1   | DSE4              | opCaV0100000640 | Endo-1,3-beta-glucanase required for cell separation after division, orthologous to <i>S. cerevisiae</i> Dse4p; caspofungin          | -2.5 |
| orf19.6220.4 |        | RPL34B            | opCaV0100001534 | ORF Predicted by Annotation Working Group                                                                                            | -2.5 |
| orf19.2179.2 | RPS10  | RPS10A            | opCaV0100001524 | Predicted ribosomal protein; downregulated in the presence of human whole blood or polymorphonuclear (PMN) cells                     | -2.5 |
| orf19.7015   | RPP0   | RPP0              | CA05314_01      | Putative ribosomal protein; genes encoding cytoplasmic ribosomal subunits, translation factors, and tRNA synthetases                 | -2.5 |
| orf19.840    | RPL21A | RPL21A            | opCaV0100000493 | Putative ribosomal protein; genes encoding cytoplasmic ribosomal subunits, translation factors, and tRNA synthetases                 | -2.5 |
| orf19.5635   | PGA7   | TIR1              | CA02680_01      | Protein described as a putative precursor of a hyphal surface antigen; putative GPI-anchor; induced by ciclopirox olamine,           | -2.5 |
| orf19.7238   | NPL3   | NPL3              | CA05480_01      | Putative RNA-binding protein, ortholog of <i>S. cerevisiae</i> Npl3p; nuclear export is facilitated by Hmt1p                         | -2.5 |
| orf19.5927   | RPS15  | RPS15             | CA06318_01      | Putative ribosomal protein; macrophage/pseudohyphal-induced after 16 h; genes encoding cytoplasmic ribosomal subunits,               | -2.5 |
| orf19.6541   | RPL5   | RPL5              | opCaV0100000431 | Predicted ribosomal protein; genes encoding cytoplasmic ribosomal subunits, translation factors, and tRNA synthetases                | -2.5 |
| orf19.1701   |        | RK11              | CA01735_01      | Predicted ORF in Assemblies 19, 20 and 21                                                                                            | -2.5 |
| orf19.3475   |        | DEF1              | opCaV0100001199 | Described as a Gag-related protein; hyphal induced; downregulation correlates with clinical development of                           | -2.5 |
| orf19.85     | GPX2   | HYR1              | opCaV0100000692 | Similar to glutathione peroxidase; expression greater in high iron; alkaline upregulated by Rim101p; transcriptionally induced       | -2.5 |
| orf19.3846   | LYS4   | LYS4              | CA04948_01      | Protein described as homoacnitase; regulated by Gcn4p, Gcn2p; induced in response to amino acid starvation (3-                       | -2.5 |
| orf19.7502   |        |                   | opCaV0100000636 | Predicted ORF in Assemblies 19, 20 and 21; greater mRNA abundance observed in a <i>cyr1</i> homozygous null mutant than in           | -2.5 |
| orf19.1033   | STR2   | STR2              | CA01851_01      | Protein not essential for viability; similar to <i>S. cerevisiae</i> Str2p, which is cystathionine gamma-synthase involved in sulfur | -2.5 |
| orf19.5673   | OPT7   | OPT2              | CA04411_01      | Putative oligopeptide transporter; possibly transports GSH and related compounds; induced upon biofilm formation; Hog1p-             | -2.5 |
|              |        |                   | CA10060_01      |                                                                                                                                      | -2.5 |
| orf19.4040   | ILV3   | ILV3              | CA04870_01      | Putative dihydroxyacid dehydratase; fungal-specific (no human or murine homolog); upregulated in biofilm; <i>S. cerevisiae</i>       | -2.5 |
| orf19.712    | KIP1   | CIN8              | CA01501_01      | Non-essential kinesin from the bipolar (Kinesis-5) family; involved in formation of the mitotic spindle                              | -2.5 |
| orf19.1358   | GCN4   | GCN4              | CA00423_01      | Transcriptional activator of general amino acid control response; required for Efg1p-dependent pseudohyphal filament                 | -2.6 |
| orf19.7048.1 | RPS28B | RPS28B            | opCaV0100000453 | Putative ribosomal protein S28B; ORF Predicted by Annotation Working Group                                                           | -2.6 |
| orf19.4931.1 |        | RPL14A <br>RPL14B | opCaV0100001471 | ORF Predicted by Annotation Working Group                                                                                            | -2.6 |

|              |        |                   |                 |                                                                                                                                  |      |
|--------------|--------|-------------------|-----------------|----------------------------------------------------------------------------------------------------------------------------------|------|
| orf19.1115   | GUK1   | GUK1              | CA02023_01      | Putative guanylate kinase; identified in extracts from biofilm and planktonic cells                                              | -2.6 |
| orf19.5528   | MOB1   | MOB1              | CA02658_01      | Predicted ORF in Assemblies 19, 20 and 21                                                                                        | -2.6 |
| orf19.4060   | ARO4   | ARO4              | opCaV0100001326 | 3-Deoxy-D-arabinoheptulosonate-7-phosphate synthase; enzyme of aromatic amino acid biosynthesis; GCN-regulated;                  | -2.6 |
| orf19.5062   |        |                   | opCaV0100000963 | Predicted ORF from Assembly 19; merged with orf19.5061 in Assembly 20                                                            | -2.6 |
| orf19.6779   | PRO2   | PRO2              | CA06089_01      | Predicted ORF in Assemblies 19, 20 and 21; regulated by Gcn2p and Gcn4p                                                          | -2.6 |
| orf19.5245   |        | BUL2              | CA05095_01      | Predicted ORF in Assemblies 19, 20 and 21                                                                                        | -2.6 |
| orf19.7634   | MCD1   | MCD1              | CA06204_01      | Protein similar to <i>S. cerevisiae</i> Mcd1p; transcription is repressed in response to alpha pheromone in SpiderM medium       | -2.6 |
| orf19.6124   | ACE2   | ACE2              | CA03076_01      | Putative transcription factor involved in regulation of morphogenesis; required for wild-type cell separation,                   | -2.6 |
| orf19.3616   | ERG9   | ERG9              | CA00372_01      | Putative farnesyl-diphosphate farnesyl transferase (squalene synthase) involved in the sterol biosynthesis pathway; likely to    | -2.6 |
| orf19.4945   | MSH6   | MSH6              | CA03745_01      | Protein similar to <i>S. cerevisiae</i> Msh6p, which is involved in mismatch repair; repressed under Cdc5p depletion             | -2.6 |
| orf19.1613   | ILV2   | ILV2              | CA00834_01      | Protein described as acetolactate synthase; regulated by Gcn4p; induced in response to amino acid starvation (3-                 | -2.6 |
| orf19.6312   | RPS3   | RPS3              | CA03342_01      | Putative ribosomal protein; Hog1p-induced; genes encoding cytoplasmic ribosomal subunits, translation factors, and tRNA          | -2.6 |
| orf19.493    | RPL15A | RPL15B <br>RPL15A | CA04555_01      | Putative ribosomal protein; genes encoding cytoplasmic ribosomal subunits, translation factors, and tRNA synthetases             | -2.6 |
| orf19.4617   |        | MAK3              | CA05293_01      | Predicted ORF in Assemblies 19, 20 and 21                                                                                        | -2.6 |
| orf19.6645   | HMO1   | HMO1              | CA04111_01      | High mobility group-like protein; activates pseudohyphal growth when expressed in <i>S. cerevisiae</i> ; decreased expression in | -2.6 |
| orf19.6755   |        | DLD1              | CA06110_01      | Predicted ORF in Assemblies 19, 20 and 21                                                                                        | -2.6 |
| orf19.4675   |        |                   | CA03312_01      | Predicted ORF in Assemblies 19, 20 and 21                                                                                        | -2.7 |
| orf19.5006   |        | GCV3              | CA05367_01      | Predicted ORF in Assemblies 19, 20 and 21                                                                                        | -2.7 |
| orf19.2618   | MET2   | MET2              | CA00985_01      | Putative homoserine acetyltransferase; Gcn4p-regulated; macrophage/pseudohyphal-repressed; not greatly induced by                | -2.7 |
| orf19.6644   |        |                   | CA04110_01      | Predicted ORF in Assemblies 19, 20 and 21                                                                                        | -2.7 |
| orf19.3641   |        |                   | CA01202_01      | Expression is regulated upon white-opaque switching; merged with orf19.84 in Assembly 20                                         | -2.7 |
| orf19.4630   | CPA1   | CPA1              | CA01189_01      | Alkaline downregulated                                                                                                           | -2.7 |
| orf19.6002   | RPL8B  | RPL8B             | opCaV0100000272 | Predicted ribosomal protein; transcription is regulated upon yeast-hyphal switch; genes encoding cytoplasmic ribosomal           | -2.7 |
| orf19.5750   | SHM2   | SHM2              | CA10044_01      | Cytoplasmic serine hydroxymethyltransferase; complements the glycine auxotrophy of an <i>S. cerevisiae</i> shm1 null shm2 null   | -2.7 |
| orf19.7095   |        | YOR390W           | CA05757_01      | Predicted ORF in Assemblies 19, 20 and 21                                                                                        | -2.7 |
| orf19.6936   | RAD53  | RAD53             | CA04767_01      | Protein involved in regulation of DNA-damage-induced filamentous growth; putative component of cell cycle                        | -2.7 |
| orf19.6882.1 |        | RPL33A            | opCaV0100000854 | ORF Predicted by Annotation Working Group                                                                                        | -2.7 |
| orf19.1116   |        |                   | CA02024_01      | Predicted ORF in Assemblies 19, 20 and 21; possibly spurious ORF (Annotation Working Group prediction)                           | -2.7 |
| orf19.2512   |        |                   | CA02300_01      | Predicted ORF in Assemblies 19, 20 and 21; possibly spurious ORF (Annotation Working Group prediction)                           | -2.7 |
| orf19.5928   | RPP2B  | RPP2B             | CA06317_01      | Conserved acidic ribosomal protein, likely to be involved in regulation of translation elongation; interacts with Rpp1Ap; one    | -2.8 |
| orf19.2525   | LYS12  | LYS12             | CA01954_01      | Protein described as mitochondrial homoisocitrate dehydrogenase                                                                  | -2.8 |



|              |        |         |                 |                                                                                                                               |      |
|--------------|--------|---------|-----------------|-------------------------------------------------------------------------------------------------------------------------------|------|
| orf19.3146   |        |         | CA00987_01      | Predicted ORF from Assembly 19; merged with orf19.2227 in Assembly 20                                                         | -2.8 |
| orf19.4704   | ARO1   | ARO1    | CA02054_01      | Putative pentafunctional arom enzyme; fungal-specific (no human or murine homolog); Gcn2p-, Gcn4p-regulated                   | -2.8 |
| orf19.1679   |        |         | CA01167_01      | Predicted ORF in Assemblies 19, 20 and 21                                                                                     | -2.8 |
| orf19.6403.1 | RPP2A  | RPP2B   | opCaV0100000556 | Conserved acidic ribosomal protein, likely to be involved in regulation of translation elongation; interacts with Rpp1Bp; one | -2.8 |
| orf19.4192   | CDC14  | CDC14   | CA01560_01      | Protein involved in exit from mitosis and morphogenesis; ortholog of <i>S. cerevisiae</i> Cdc14p, which is a dual-specificity | -2.8 |
| orf19.2360   | URA2   | URA2    | CA00584_01      | Predicted ORF in Assemblies 19, 20 and 21; flucytosine induced; macrophage/pseudohyphal-induced; intron in 5'-UTR             | -2.8 |
| orf19.2374   |        |         | opCaV0100001509 | Predicted ORF from Assembly 19; removed from Assembly 20                                                                      | -2.8 |
| orf19.2607   |        | PMU1    | CA02541_01      | Predicted ORF in Assemblies 19, 20 and 21                                                                                     | -2.8 |
| orf19.3969   |        | SFL1    | CA01563_01      | Predicted ORF in Assemblies 19, 20 and 21                                                                                     | -2.9 |
| orf19.5591   | ADO1   | ADO1    | opCaV0100001425 | Predicted ORF in Assemblies 19, 20 and 21; ketoconazole-induced                                                               | -2.9 |
| orf19.6702   | DED81  | DED81   | CA04325_01      | Putative tRNA-Asn synthetase; genes encoding ribosomal subunits, translation factors, and tRNA synthetases are                | -2.9 |
| orf19.1799   |        | GAP1    | opCaV0100001313 | Putative general amino acid permease; fungal-specific (no human or murine homolog)                                            | -2.9 |
| orf19.236    | RPL9B  | RPL9B   | CA00673_01      | Predicted ribosomal protein; genes encoding cytoplasmic ribosomal subunits, translation factors, and tRNA synthetases         | -2.9 |
| orf19.2372   |        |         | CA10283_01      | Predicted ORF from Assembly 19; orf19.2371, orf19.2372, and orf19.2375 are similar to the Tca2 (pCal) retrotransposon,        | -2.9 |
| orf19.3591   | APE3   | APE3    | CA01187_01      | Predicted ORF in Assemblies 19, 20 and 21; regulated by Gcn2p and Gcn4p                                                       | -2.9 |
| orf19.926    |        | EXO1    | CA01626_01      | Predicted ORF in Assemblies 19, 20 and 21                                                                                     | -2.9 |
| orf19.6632   | ACO2   | ACO2    | CA04099_01      | Protein described as aconitate hydratase 2; regulated by Gcn4p; repressed in response to amino acid starvation (3-            | -2.9 |
| orf19.2179   | SIT1   | ARN1    | CA03773_01      | Transporter of ferrichrome siderophores, but not ferrioxamine B; required for wild-type invasion of human epithelial cells in | -2.9 |
| orf19.2992   | RPP1A  | RPP1A   | CA10241_01      | Conserved acidic ribosomal protein, likely to be involved in regulation of translation elongation; interacts with Rpp2Bp; one | -2.9 |
| orf19.2371   |        |         | opCaV0100001532 | Predicted ORF from Assembly 19; orf19.2371, orf19.2372, and orf19.2375 are similar to the Tca2 (pCal) retrotransposon,        | -2.9 |
| orf19.3893   | SCW11  | SCW11   | CA01345_01      | Cell wall protein; transcription is decreased in mutant lacking ACE2; downregulated in core caspofungin response;             | -2.9 |
| orf19.944    | IFG3   |         | CA05524_01      | Putative D-amino acid oxidase                                                                                                 | -2.9 |
| orf19.3957   |        | FOL2    | CA00734_01      | Predicted ORF in Assemblies 19, 20 and 21                                                                                     | -3.0 |
| orf19.4827   | ADE12  | ADE12   | CA04817_01      | Predicted enzyme of adenine biosynthesis; upregulated in biofilm; decreased expression in hyphae compared to yeast-           | -3.0 |
| orf19.668    |        | TOS4    | CA04127_01      | Predicted ORF in Assemblies 19, 20 and 21                                                                                     | -3.0 |
| orf19.780    | DUR1,2 | DUR1,2  | CA02433_01      | Transcription is regulated by Nrg1p                                                                                           | -3.0 |
| orf19.5877   |        |         | CA06359_01      | Predicted ORF in Assemblies 19, 20 and 21; caspofungin repressed                                                              | -3.0 |
| orf19.2196   |        | CUE3    | CA02581_01      | Predicted ORF in Assemblies 19, 20 and 21                                                                                     | -3.0 |
| orf19.5372   |        |         | opCaV0100000291 | Predicted ORF from Assembly 19; orf19.5372 and orf19.5373 are similar to the Tca2 (pCal) retrotransposon, which is present    | -3.0 |
| orf19.7244   |        | YNL168C | CA05486_01      | Predicted ORF in Assemblies 19, 20 and 21; induced by nitric oxide in yhb1 mutant                                             | -3.0 |
| orf19.7534   |        | MIS1    | CA06036_01      | Predicted ORF in Assemblies 19, 20 and 21                                                                                     | -3.0 |

|            |        |         |                 |                                                                                                                                       |      |
|------------|--------|---------|-----------------|---------------------------------------------------------------------------------------------------------------------------------------|------|
| orf19.6086 | LEU4   | LEU4    | CA03899_01      | Putative 2-isopropylmalalate synthase; regulated by Nrg1p, Mig1p, Tup1p, Gcn4p; upregulated in the presence of human                  | -3.0 |
|            |        |         | CA04954_01      |                                                                                                                                       | -3.0 |
| orf19.5178 | ERG5   | ERG5    | CA04447_01      | Putative C-22 sterol desaturase; fungal C-22 sterol desaturases are cytochrome P450 enzymes of ergosterol                             | -3.0 |
| orf19.1235 | HOM3   | HOM3    | opCaV0100000213 | Putative L-aspartate 4-P-transferase; fungal-specific (no human or murine homolog); regulated by Gcn2p and Gcn4p                      | -3.0 |
| orf19.3115 |        |         | CA04427_01      | Predicted ORF in Assemblies 19, 20 and 21; possibly spurious ORF (Annotation Working Group prediction)                                | -3.0 |
| orf19.4012 | PCL5   |         | CA04845_01      | Protein similar to <i>S. cerevisiae</i> Pcl5p and other cyclins for Pho85p kinase; Gcn4p-induced; suppresses toxicity of C.           | -3.0 |
| orf19.1743 | ACS1   | ACS1    | opCaV0100000858 | Putative acetyl-CoA synthetase, similar to <i>S. cerevisiae</i> Acs2p; upregulated in the presence of human neutrophils; fluconazole- | -3.0 |
| orf19.6899 |        |         | CA04629_01      | Predicted ORF in Assemblies 19, 20 and 21                                                                                             | -3.0 |
| orf19.1857 |        | SPT10   | CA03426_01      | Protein not essential for viability                                                                                                   | -3.0 |
| orf19.1375 | LEU42  | LEU4    | CA02461_01      | Putative alpha-isopropylmalate synthase; fungal-specific (no human or murine homolog); upregulated in the presence of                 | -3.0 |
| orf19.2375 |        |         | opCaV0100000169 | Predicted ORF from Assembly 19; orf19.2371, orf19.2372, and orf19.2375 are similar to the Tca2 (pCal) retrotransposon,                | -3.1 |
| orf19.5784 |        |         | CA02918_01      | Predicted ORF in Assemblies 19, 20 and 21                                                                                             | -3.1 |
| orf19.2759 |        |         | opCaV0100000280 | Putative GPI-anchored protein of unknown function; repressed during cell wall regeneration; merged with orf19.2758 in                 | -3.1 |
| orf19.1272 |        | YGR111W | CA01255_01      | Predicted ORF in Assemblies 19, 20 and 21                                                                                             | -3.1 |
| orf19.4513 |        |         | opCaV0100000427 | Protein not essential for viability; possibly spurious ORF (Annotation Working Group prediction)                                      | -3.1 |
| orf19.3489 | ARO22  |         | opCaV0100001129 | Putative chorismate synthase; fungal-specific (no human or murine homolog); merged with orf19.1986 in Assembly 20                     | -3.1 |
|            |        |         | CA01474_01      |                                                                                                                                       | -3.1 |
| orf19.1587 | HGT20  | YBR241C | CA03214_01      | Putative glucose transporter of the major facilitator superfamily; the <i>C. albicans</i> glucose transporter family comprises 20     | -3.1 |
| orf19.5188 | CHS1   | CHS2    | CA00376_01      | Chitin synthase; essential; required for primary septum synthesis in yeast-form cells and hyphae; one of multiple chitin              | -3.1 |
| orf19.4304 | GAP1   | GAP1    | CA02765_01      | General amino acid permease; antigenic in human; 10-12 transmembrane regions; regulated by nitrogen source; alkaline,                 | -3.1 |
| orf19.3142 |        |         | CA01085_01      | Predicted ORF in Assemblies 19, 20 and 21                                                                                             | -3.1 |
| orf19.557  |        |         | CA01234_01      | Predicted ORF in Assemblies 19, 20 and 21                                                                                             | -3.1 |
| orf19.6451 |        |         | opCaV0100001319 | Predicted ORF from Assembly 19; similar to a region of the Tca2 (pCal) retrotransposon, which is present in strain                    | -3.2 |
| orf19.5243 | TRP3   | TRP3    | CA05097_01      | Predicted ORF in Assemblies 19, 20 and 21; regulated by Gcn2p and Gcn4p                                                               | -3.2 |
| orf19.5061 | ADE5,7 | ADE5,7  | opCaV0100000430 | Enzyme of adenine biosynthesis; interacts with Vps34p; required for hyphal growth and virulence; flucytosine induced;                 | -3.2 |
| orf19.1832 | FCY23  | TPN1    | CA02526_01      | Putative transporter; Gcn4p-regulated; more similar to <i>S. cerevisiae</i> Tpn1p, which is a vitamin B6 transporter, than to         | -3.2 |
|            |        |         | CA10144_01      |                                                                                                                                       | -3.2 |
| orf19.3612 | PST2   | PST2    | CA01891_01      | Putative NADH:quinone oxidoreductase; similar to 1,4-benzoquinone reductase; immunogenic in mouse; increased                          | -3.2 |
| orf19.3895 | CHT2   | CTS1    | CA10176_01      | Chitinase; putative N-terminal catalytic domain, GPI anchor, O-mannosylated region, signal peptide; 3 N-glycosylation motifs;         | -3.2 |
| orf19.2551 | MET6   | MET6    | CA01016_01      | 5-methyltetrahydropteroyltriglutamate-homocysteine methyltransferase (cobalamin-independent methionine                                | -3.3 |
|            |        |         | CA00152_01      |                                                                                                                                       | -3.4 |

|              |        |         |                 |                                                                                                                                       |      |
|--------------|--------|---------|-----------------|---------------------------------------------------------------------------------------------------------------------------------------|------|
| orf19.2758   | PGA38  | AGA1    | opCaV0100000511 | Putative GPI-anchored protein of unknown function; repressed during cell wall regeneration                                            | -3.4 |
| orf19.7313   | SSU1   | SSU1    | CA05698_01      | Protein similar to <i>S. cerevisiae</i> Ssu1p sulfite transport protein; transposon mutation affects filamentous growth; regulated by | -3.4 |
| orf19.3722   |        | FAP1    | CA01078_01      | Predicted ORF in Assemblies 19, 20 and 21                                                                                             | -3.4 |
| orf19.2583.2 |        | OPT2    | opCaV0100000904 | ORF Predicted by Annotation Working Group                                                                                             | -3.4 |
| orf19.5263   | SER33  | SER3    | CA05077_01      | Predicted enzyme of amino acid biosynthesis; Gcn4p-regulated; upregulated in biofilm; <i>S. cerevisiae</i> ortholog is                | -3.4 |
| orf19.4631   | ERG251 | ERG25   | opCaV0100000418 | Predicted ORF in Assemblies 19, 20 and 21; ketoconazole-induced; amphoterin B, caspofungin repressed                                  | -3.4 |
| orf19.5779   | RNR1   | RNR1    | CA02913_01      | Protein similar <i>S. cerevisiae</i> Rnr1p, large subunit of ribonucleotide reductase; expression greater in low iron;                | -3.4 |
| orf19.2283   | DQD1   |         | opCaV0100000775 | Predicted ORF in Assemblies 19, 20 and 21; ketoconazole-repressed; macrophage-downregulated protein abundance                         | -3.4 |
| orf19.9      |        | LAS17   | CA00553_01      | Predicted ORF in Assemblies 19, 20 and 21; possibly spurious ORF (Annotation Working Group prediction)                                | -3.5 |
| orf19.1394   |        | YCR090C | opCaV0100000238 | Protein not essential for viability                                                                                                   | -3.5 |
| orf19.4664   |        | NAT4    | CA02822_01      | Predicted ORF in Assemblies 19, 20 and 21                                                                                             | -3.5 |
| orf19.4581   |        | GPI14   | CA05258_01      | Predicted ORF in Assemblies 19, 20 and 21; regulated by Tsa1p, Tsa1Bp under H <sub>2</sub> O <sub>2</sub> stress conditions           | -3.5 |
| orf19.1986   | ARO2   | ARO2    | opCaV0100000584 | Putative chorismate synthase; fungal-specific (no human or murine homolog)                                                            | -3.5 |
| orf19.3099   | TRP4   | TRP4    | CA04440_01      | Predicted enzyme of amino acid biosynthesis; upregulated in biofilm; regulated by Gcn2p and Gcn4p; <i>S. cerevisiae</i> ortholog      | -3.5 |
| orf19.1815   |        | TIF6    | opCaV0100001631 | Predicted ORF in Assemblies 19, 20 and 21                                                                                             | -3.5 |
| orf19.1295   | VAS1   | VAS1    | CA00661_01      | Putative tRNA-Val synthetase; genes encoding ribosomal subunits, translation factors, and tRNA synthetases are                        | -3.6 |
| orf19.6559   |        | TFC7    | opCaV0100001589 | Predicted ORF in Assemblies 19, 20 and 21                                                                                             | -3.6 |
| orf19.2951   | HOM6   | HOM6    | CA04201_01      | Protein described as homoserine dehydrogenase; regulated by Gcn4p; induced in response to amino acid starvation (3-                   | -3.6 |
| orf19.2351   | NIT3   | NIT3    | CA02488_01      | Predicted ORF in Assemblies 19, 20 and 21; regulated by Gcn2p and Gcn4p                                                               | -3.6 |
| orf19.2849   | AQY1   | AQY1    | CA02971_01      | Aquaporin water channel; mutant has increased resistance to osmotic shock; required for wild-type tolerance of freezing; not          | -3.6 |
|              |        |         | CA10001_01      |                                                                                                                                       | -3.6 |
|              |        |         | CA02682_01      |                                                                                                                                       | -3.6 |
| orf19.6317   | ADE6   | ADE6    | CA03347_01      | Enzyme of adenine biosynthesis; not induced during GCN response, in contrast to the <i>S. cerevisiae</i> ortholog                     | -3.6 |
| orf19.2284   |        |         | opCaV0100000996 | Predicted ORF in Assemblies 19, 20 and 21                                                                                             | -3.7 |
| orf19.5636   | RBT5   |         | CA02681_01      | GPI-anchored cell wall protein; has CRoW motif, not required for filamentous growth; expression is regulated by Rfg1p,                | -3.7 |
| orf19.5211   | IDP1   | IDP1    | CA02287_01      | Protein described as isocitrate dehydrogenase; transcriptionally induced by interaction with macrophage; alkaline upregulated         | -3.7 |
| orf19.7312   | ERG13  | ERG13   | CA05697_01      | Protein similar to <i>S. cerevisiae</i> Erg13p, which is involved in ergosterol biosynthesis; transposon mutation affects             | -3.7 |
| orf19.3810   |        | MTD1    | CA04915_01      | Predicted ORF in Assemblies 19, 20 and 21                                                                                             | -3.7 |
| orf19.4211   | FET3   | FET3    | CA03015_01      | Multicopper oxidase; required for growth under low-iron conditions; null mutant shows decreased prostaglandin E <sub>2</sub>          | -3.8 |
| orf19.5480   | ILV1   | ILV1    | CA02470_01      | Protein described as threonine dehydratase; regulated by Gcn4p and Gcn2p; induced in response to amino acid                           | -3.8 |
| orf19.300    | AIP2   | DLD2    | CA02554_01      | Protein described as an actin interacting protein; regulated by Gcn4p; induced in response to amino acid starvation (3-               | -3.8 |

|              |       |           |                 |                                                                                                                                           |      |
|--------------|-------|-----------|-----------------|-------------------------------------------------------------------------------------------------------------------------------------------|------|
| orf19.1585   | ZRT2  | ZRT2      | CA03215_01      | Protein described as predicted zinc transporter; ciclopirox olamine, fluconazole, or alkaline downregulated;                              | -3.8 |
| orf19.4718   | TRP5  | TRP5      | CA01809_01      | Predicted tryptophan synthase; Gcn4p-regulated; upregulated in biofilm; identified in detergent-resistant membrane fraction               | -3.8 |
| orf19.198    | ASN1  | ASN2      | CA03658_01      | Protein described as asparagine synthetase; soluble protein in hyphae; regulated by Rim101p; decreased expression at pH 4                 | -3.9 |
| orf19.5664   | HOF1  |           | CA04402_01      | Protein not essential for viability; similar to <i>S. cerevisiae</i> Hof1p, which is a protein localized to the bud neck and required for | -3.9 |
| orf19.7638   | PRO1  | PRO1      | CA06208_01      | Transcription is regulated by Nrg1p; regulated by Gcn2p and Gcn4p                                                                         | -3.9 |
| orf19.3549   | CDC21 | CDC21     | CA00384_01      | Predicted ORF in Assemblies 19, 20 and 21; flucytosine induced                                                                            | -3.9 |
| orf19.5137.1 | HHO1  | HHO1      | opCaV0100001469 | Protein described at histone H1; farnesol regulated                                                                                       | -3.9 |
| orf19.2546   | TRP2  | TRP2      | CA01353_01      | Predicted ORF in Assemblies 19, 20 and 21; regulated by Gcn2p and Gcn4p                                                                   | -3.9 |
| orf19.1853   | HHT2  | HHT2 HHT1 | opCaV0100001007 | Protein described as histone H3; farnesol regulated                                                                                       | -4.0 |
| orf19.3365   | DAO2  |           | opCaV0100000901 | Putative D-amino acid oxidase                                                                                                             | -4.0 |
| orf19.1061   | HHT21 | HHT2 HHT1 | opCaV0100001390 | Putative histone H3; amphotericin B repressed; regulated by Efg1p; farnesol regulated                                                     | -4.0 |
| orf19.4910   | FGR41 | DSE2      | CA02198_01      | Putative GPI-anchored protein; transposon mutation affects filamentous growth; possibly spurious ORF (Annotation                          | -4.1 |
| orf19.797    | BAT21 | BAT2      | CA00741_01      | Protein described as a branched chain amino acid aminotransferase; regulated by Gcn4p, Gcn2p; induced in                                  | -4.1 |
| orf19.2292   |       |           | opCaV0100000630 | Oligopeptide transporter; transcriptionally induced upon phagocytosis by macrophage; fungal-specific (no human or                         | -4.1 |
| orf19.7637   | YHB4  | YHB1      | CA06207_01      | Protein related to flavohemoglobins; not required for wild-type nitric oxide resistance; has predicted globin, FAD-binding, and           | -4.2 |
| orf19.923    | THR1  | THR1      | CA01629_01      | Putative homoserine kinase; fungal-specific (no human or murine homolog); transcription is regulated by Tup1p;                            | -4.2 |
| orf19.1789.1 | LYS1  | LYS1      | CA00241_01      | Saccharopine dehydrogenase (biosynthetic); enzyme of alpha-aminoacidipate lysine biosynthesis pathway; functionally                       | -4.2 |
| orf19.7484   | ADE1  | ADE1      | CA10191_01      | Phosphoribosylaminoimidazole succinocarboxamide synthetase, enzyme of adenine biosynthesis; not induced                                   | -4.2 |
| orf19.6924   | HTA1  | HTA1      | CA04758_01      | Putative histone H2A; reduced mRNA abundance detected in homozygous fkh2 null mutant; amphotericin B repressed;                           | -4.3 |
| orf19.2446   |       | YDL144C   | CA01119_01      | Predicted ORF in Assemblies 19, 20 and 21                                                                                                 | -4.3 |
| orf19.2364   | MIS11 | MIS1      | CA02406_01      | Protein described as similar to precursor of mitochondrial C1-tetrahydrofolate synthase; putative protein of glycine                      | -4.3 |
| orf19.1559   | HOM2  | HOM2      | CA04011_01      | Putative aspartate-semialdehyde dehydrogenase; fungal-specific (no human or murine homolog); ketoconazole-                                | -4.3 |
| orf19.3770   | ARG8  | ARG8      | opCaV0100000423 | Predicted ORF in Assemblies 19, 20 and 21; Gcn2p-, Gcn4p-regulated                                                                        | -4.3 |
| tE(UUC)1     |       |           | CAF0007147      | tRNA-Glu predicted by tRNAscan-SE                                                                                                         | -4.3 |
| orf19.3870   | ADE13 | ADE13     | opCaV0100001066 | Enzyme of adenine biosynthesis; soluble protein in hyphae; not induced during GCN response, in contrast to the <i>S. cerevisiae</i>       | -4.3 |
| orf19.288    |       | MET13     | CA02891_01      | Predicted ORF in Assemblies 19, 20 and 21                                                                                                 | -4.4 |
| orf19.2988   |       |           | CA03489_01      | Predicted ORF in Assemblies 19, 20 and 21                                                                                                 | -4.4 |
| orf19.1631   | ERG6  | ERG6      | CA10112_01      | Delta(24)-sterol C-methyltransferase, converts zymosterol to fecosterol in ergosterol biosynthesis by methylating position C-             | -4.4 |
| orf19.1790   |       |           | opCaV0100001145 | Predicted ORF from Assembly 19; merged with orf19.1789.1 in Assembly 20                                                                   | -4.5 |
| orf19.1854   | HHF2  | HHF2 HHF1 | opCaV0100001490 | Putative histone H4; regulated by Efg1p; flucytosine, fluconazole-induced; amphotericin B, caspofungin repressed;                         | -4.5 |
| orf19.1059   | HHF1  | HHF2 HHF1 | opCaV0100000137 | Putative histone H4; reduced mRNA in homozygous fkh2 null mutant; regulated by Efg1p; fluconazole induced; amphotericin                   | -4.6 |

|            |       |         |                 |                                                                                                                               |      |
|------------|-------|---------|-----------------|-------------------------------------------------------------------------------------------------------------------------------|------|
| orf19.7586 | CHT3  | CTS1    | CA10175_01      | Chitinase, major; functional homolog of <i>S. cerevisiae</i> Cts1p; 4 N-glycosylation motifs; possible O-mannosylated region; | -4.6 |
| orf19.4506 | LYS22 | LYS21   | opCaV0100000820 | Putative homocitrate synthase; fungal-specific (no human or murine homolog); repressed by nitric oxide                        | -4.7 |
| orf19.406  | ERG1  | ERG1    | CA10278_01      | Squalene epoxidase, catalyzes epoxidation of squalene to 2,3(S)-oxidosqualene in the ergosterol biosynthetic pathway;         | -4.7 |
| orf19.2947 | SNZ1  | SNZ1    | CA04205_01      | Similar to stationary-phase-related proteins; soluble in hyphae; induced on yeast to hyphal switch, in response to 3-         | -4.8 |
| orf19.5267 |       |         | CA05073_01      | Putative cell wall protein; downregulated in core caspofungin response; transcription is repressed in response to alpha       | -4.8 |
| orf19.2970 | LYS2  | LYS2    | opCaV0100000598 | Large subunit of heterodimeric alpha-amino acid reductase; enzyme of lysine biosynthesis; contains predicted binding sites    | -4.8 |
| orf19.5505 | HIS7  | HIS7    | CA02589_01      | Putative imidazole glycerol phosphate synthase; enzyme of histidine biosynthesis; fungal-specific (no human or murine         | -4.9 |
| orf19.176  | OPT4  | OPT2    | opCaV0100000116 | Oligopeptide transporter; detected at germ tube plasma membrane by mass spectrometry; transcriptionally induced               | -4.9 |
| orf19.5484 |       | SER1    | CA02473_01      | Predicted ORF in Assemblies 19, 20 and 21                                                                                     | -4.9 |
| orf19.1347 |       |         | opCaV0100000389 | Predicted ORF from Assembly 19; gene fragment (probable assembly 19 error); 3' end of OPT5 (oligopeptide transporter);        | -5.0 |
| orf19.385  | GCV2  | GCV2    | opCaV0100000658 | Putative protein of glycine catabolism; downregulated by Efg1p; Hog1p-induced; upregulated by Rim101p at acid pH              | -5.0 |
| orf19.1108 | HAM1  | HAM1    | CA01696_01      | Predicted ORF in Assemblies 19, 20 and 21; caspofungin repressed; regulated by Gcn2p and Gcn4p                                | -5.0 |
| orf19.5672 | MEP2  | MEP2    | CA04410_01      | Ammonium permease and regulator of nitrogen starvation-induced filamentation; 11 predicted transmembrane regions; in          | -5.1 |
| orf19.4026 | HIS1  | HIS1    | CA10076_01      | ATP phosphoribosyl transferase; enzyme of histidine biosynthesis; fungal-specific (no human, murine homolog);                 | -5.1 |
| orf19.767  | ERG3  | ERG3    | CA10061_01      | C-5 sterol desaturase; introduces C-5(6) double bond into episterol in ergosterol biosynthesis; clinically-isolated           | -5.2 |
| orf19.3554 | AAT1  | AAT1    | CA02783_01      | Protein described as aspartate aminotransferase; soluble protein in hyphae; macrophage-induced protein; alkaline              | -5.2 |
| orf19.922  | ERG11 | ERG11   | CA10287_01      | Lanosterol 14-alpha-demethylase, member of cytochrome P450 family that functions in ergosterol biosynthesis; target of        | -5.2 |
| orf19.1052 |       | HTB1    | opCaV0100000617 | Predicted histone H2B                                                                                                         | -5.4 |
| orf19.4177 | HIS5  | HIS5    | CA03761_01      | Predicted ORF in Assemblies 19, 20 and 21; Gcn4p-regulated                                                                    | -5.4 |
| orf19.1051 | HTA2  | HTA1    | CA01171_01      | Protein described as histone H2A; farnesol regulated                                                                          | -5.5 |
|            |       |         | CA00295_01      |                                                                                                                               | -5.5 |
| orf19.5639 | HIS4  | HIS4    | CA10274_01      | Multifunctional enzyme that catalyzes three steps of histidine biosynthesis, with phosphoribosyl-AMP cyclohydrolase,          | -5.5 |
| orf19.3749 | IFC3  | OPT2    | opCaV0100000282 | Oligopeptide transporter; transcriptionally induced upon phagocytosis by macrophage; induced by BSA or peptides;              | -5.5 |
|            |       |         | CA10244_01      |                                                                                                                               | -5.5 |
| orf19.1517 | ARO3  | ARO3    | opCaV0100000128 | 3-Deoxy-D-arabinoheptulosonate-7-phosphate synthase; enzyme of aromatic amino acid biosynthesis; GCN-regulated;               | -5.6 |
| orf19.3175 |       | YOR356W | CA00901_01      | Predicted ORF in Assemblies 19, 20 and 21; alkaline downregulated; repressed by nitric oxide                                  | -5.6 |
| orf19.6925 | HTB1  | HTB1    | opCaV0100000540 | Putative histone H2B; induced upon adherence to polystyrene; amphotericin B or caspofungin repressed; flucytosine or          | -5.6 |
| orf19.6993 | GAP2  | GAP1    | CA05132_01      | Protein similar to amino acid permeases; ketoconazole, flucytosine repressed; induced by histidine, and induction             | -6.1 |
| orf19.6994 | BAT22 | BAT2    | CA05133_01      | Protein described as a branched chain amino acid aminotransferase; regulated by Gcn4p; induced in response to                 | -6.3 |
|            |       |         | CA01465_01      |                                                                                                                               | -6.4 |
| orf19.5870 | CTP1  | CTP1    | opCaV0100000501 | Predicted ORF in Assemblies 19, 20 and 21; flucytosine induced; amphotericin B repressed, caspofungin repressed               | -6.5 |

|                                                                                                                                                                    |       |      |                 |                                                                                                                             |       |
|--------------------------------------------------------------------------------------------------------------------------------------------------------------------|-------|------|-----------------|-----------------------------------------------------------------------------------------------------------------------------|-------|
| orf19.5720                                                                                                                                                         |       | MCH4 | CA02217_01      | Predicted ORF in Assemblies 19, 20 and 21; ketoconazole or caspofungin repressed                                            | -6.7  |
| orf19.2098                                                                                                                                                         | ARO8  | ARO8 | CA04872_01      | Protein abundance is affected by URA3 expression in the CAI-4 strain background; alkaline upregulated; Gcn4p-regulated      | -6.8  |
| orf19.386                                                                                                                                                          | SAM4  | SAM4 | CA03915_01      | Alkaline upregulated                                                                                                        | -7.2  |
| orf19.4335                                                                                                                                                         | TNA1  | TNA1 | CA00613_01      | Putative nicotinic acid transporter; fungal-specific (no human or murine homolog); detected at germ tube plasma membrane by | -7.3  |
| orf19.2948                                                                                                                                                         | SNO1  | SNO1 | CA04204_01      | Protein of unknown function expressed during stationary phase; transcription is regulated by Tup1p, Efg1p                   | -7.7  |
| orf19.6570                                                                                                                                                         | NUP   |      | CA10093_01      | Nucleoside permease; adenosine and guanosine are substrates, whereas cytidine, adenine, guanine, uridine, uracil            | -8.0  |
| orf19.2584                                                                                                                                                         | OPT9  | OPT1 | opCaV0100001143 | Probable pseudogene similar to fragments of OPT1 oligopeptide transporter gene; decreased expression in hyphae              | -8.7  |
| orf19.5674                                                                                                                                                         | PGA10 | FIT1 | CA04412_01      | Plasma membrane protein involved in heme-iron utilization; allows utilization of heme and hemoglobin as iron sources in     | -9.4  |
| orf19.2602                                                                                                                                                         | OPT1  | OPT1 | CA02102_01      | Oligopeptide transporter; transports 3-to-5-residue peptides; alleles are distinct, one has intron; not ABC or PTR type     | -12.2 |
|                                                                                                                                                                    |       |      |                 |                                                                                                                             |       |
| *Oligo_ID is based on database provided by the array manufacturer (Microarrays Inc., Nashville, TN, <a href="http://www.microarrays.com">www.microarrays.com</a> ) |       |      |                 |                                                                                                                             |       |
