# Supplementary material
Source: PubMed Central journal article supplement (PMC3370752)
Supplement: supp_56.6.2894_TableS5.pdf [file supp_56.6.2894_TableS5.pdf]

**Supplemental Table S5. Primers for real-time RT-PCR assays on *C. albicans* genes**

| Gene     | ORF        | Primer Pairs                                                                 | Position*    | Amplicon Size (bp) |
|----------|------------|------------------------------------------------------------------------------|--------------|--------------------|
| FAA2     | orf19.7379 | F: 5'-CAACCTACATGTCAATTGTTCTCG-3'<br>R: 5'-GGTGATAATTCCTTGATTTTACCCTTG-3'    | 1169<br>1247 | 79                 |
| FOX2     | orf19.1288 | F: 5'-GAAACTGTCAAGCCGATAACAAGG-3'<br>R: 5'-TAGCGAATGATCTACGTTTCAGCG-3'       | 2279<br>2329 | 51                 |
| LAG1     | orf19.3249 | F: 5'-TCTGATTTCTTTTGGCATTATCG-3'<br>R: 5'-GGACCGGTAATGGGAGATTCC-3'           | 850<br>911   | 62                 |
| POT1     | orf19.7520 | F: 5'-CATGGGTGTTGGTCCAGCTTAC-3'<br>R: 5'-GTCATCCACAGTCAATCCAGTTC-3'          | 915<br>981   | 67                 |
| POX1     | orf19.5723 | F: 5'-CGGAAGTGATTA AAAAAGATATCCTCAG-3'<br>R: 5'-CGACATTTGGTCTGATTTGTTTAGC-3' | 1691<br>1759 | 69                 |
| TES1     | orf9.5217  | F: 5'-AAATCAGTGAAAATAAACCGTCC-3'<br>R: 5'-AGTTTTACCTATTGGAGTCTCGAACAG-3'     | 391<br>444   | 54                 |
| 18S rRNA |            | F: 5'-TCTGGTTGATCCTGCCAGTAGTC-3'<br>R: 5'-GCATGGCTTAATCTTTGAGACAAG-3'        | 3<br>54      | 52                 |

\*Position of 5' most primer nucleotide in the coding sequence of the gene
